# Supplementary material for: Employing a template synthesis to access diastereopure Np(iv) and U(iv) complexes and analysis of their 5f orbitals in bonding
Source: Royal Society of Chemistry journal article supplement (doi:10.1039/d4qi00810c), 2024-01-01
Supplement: d4qi00810c1.pdf [file d4qi00810c1.pdf]

Electronic Supplementary Information

**Employing a template synthesis to access diastereopure Np(IV) and U(IV) complexes and analysis of their 5f orbitals in bonding**

Stephanie H. Carpenter,<sup>a†</sup> María J. Beltrán-Leiva,<sup>b‡</sup> Shikha Sharma,<sup>a</sup> Micahel L. Tarlton,<sup>a</sup> James T. Moore,<sup>a</sup> Andrew J. Gaunt,<sup>a</sup> Enrique R. Batista,<sup>b\*</sup> Aaron M. Tondreau,<sup>a\*</sup> and Ping Yang<sup>b\*</sup>

<sup>a</sup>Chemistry Division, Los Alamos National Laboratory, Los Alamos, New Mexico 87545, United States

<sup>b</sup>Theoretical Division, Los Alamos National Laboratory, Los Alamos, New Mexico 87545, United States

Corresponding Authors

**Aaron M. Tondreau** – *Los Alamos National Laboratory, Los Alamos, New Mexico 87545, United States*; orcid.org/0000-0003-0440-5497; Email: tondreau\_a@lanl.gov

**Ping Yang** – *Los Alamos National Laboratory, Los Alamos, New Mexico 87545, United States*; orcid.org/0000-0003-4726-2860; Email: pyang@lanl.gov

**Enrique R. Batista** – *Los Alamos National Laboratory, Los Alamos, New Mexico 87545, United States*; orcid.org/0000-0002-3074-4022; Email: erb@lanl.gov

## Table of Contents (S2)

|    |                                                                                                                                      |         |
|----|--------------------------------------------------------------------------------------------------------------------------------------|---------|
| 1. | Experimental Considerations                                                                                                          | S3      |
|    | 1.1 Materials                                                                                                                        | S3      |
|    | 1.2 General Considerations                                                                                                           | S3      |
|    | 1.3 Computational Descriptions                                                                                                       | S4      |
|    | 1.4 Synthesis of $(^{t\text{Bu}2\text{P}}\text{ONO})\text{NpCl}_2(\text{dtbpy})$ , <b>2</b>                                          | S5      |
|    | 1.5 Synthesis of $(1,3\text{-iPr}_2\text{-4,7-Me}_2\text{-C}_9\text{H}_3)(^{t\text{Bu}2\text{P}}\text{ONO})\text{UCl}$ , <b>3</b>    | S5      |
|    | 1.6 Synthesis of $(1,3\text{-iPr}_2\text{-4,7-Me}_2\text{-C}_9\text{H}_3)(^{t\text{Bu}2\text{P}}\text{ONO})\text{NpCl}$ , <b>4</b>   | S6      |
| 2. | Theoretical Descriptions                                                                                                             | S7      |
|    | 2.1 Tables                                                                                                                           | S7      |
|    | 2.1.1 Raw Data for Figure 3                                                                                                          | S20-S23 |
|    | 2.2 Figures                                                                                                                          | S32     |
| 3. | Supplementary Data                                                                                                                   | S37     |
|    | 3.1 NMR Data                                                                                                                         | S37     |
|    | 3.2 UV/Vis/NIR Data                                                                                                                  | S40     |
|    | 3.3 Pictures of Reactions and Crystalline Material of <b>1</b> and <b>4</b>                                                          | S42     |
| 4. | Isolation of an Intermediate Product                                                                                                 | S45     |
| 5. | Single Crystal X-ray Diffraction Data                                                                                                | S47     |
|    | 5.1 CCDC Deposition                                                                                                                  | S47     |
|    | 5.2 Crystallography Tables: Refinement Details, Bond Distances (Å), and Angles (°)                                                   |         |
|    | $(^{t\text{Bu}2\text{P}}\text{ONO})\text{UCl}_2(\text{dtbpy})$ , <b>1</b> ( <i>P</i> -1)                                             | S48     |
|    | $(^{t\text{Bu}2\text{P}}\text{ONO})\text{NpCl}_2(\text{dtbpy})$ , <b>2</b>                                                           | S49     |
|    | $(1,3\text{-iPr}_2\text{-4,7-Me}_2\text{-C}_9\text{H}_3)(^{t\text{Bu}2\text{P}}\text{ONO})\text{UCl}$ , <b>3</b>                     | S50     |
|    | $(^{\text{OTMS}}\text{PNO}^{t\text{Bu}})\text{UCl}_2(\eta^5\text{-C}_9\text{H}_3\text{-1,3-(CHMe}_2)_2\text{-4,7-Me}_2)$ , <b>3b</b> | S51     |
|    | $(1,3\text{-iPr}_2\text{-4,7-Me}_2\text{-C}_9\text{H}_3)(^{t\text{Bu}2\text{P}}\text{ONO})\text{NpCl}$ , <b>4</b>                    | S52     |
| 6. | References                                                                                                                           | S53     |

## 1. Experimental Considerations

**Caution!** Depleted uranium (primary isotope  $^{238}\text{U}$ ,  $t_{1/2} = 4.47 \times 10^9$  years) is a weak  $\alpha$ -emitter. Neptunium ( $^{237}\text{Np}$ ,  $t_{1/2} = 2.144 \times 10^6$  years) is an  $\alpha$ -emitter and its  $^{233}\text{Pa}$  daughter is a  $\beta$ - and  $\gamma$ -emitter, where both isotopes present serious health threats. Only persons trained to handle such material should perform work and only in an adequately prepared laboratory setting. All manipulations of neptunium chemistry were conducted in a radiation laboratory equipped with high efficiency particulate air (HEPA) filtered hoods and in a negative pressure glovebox with a purified helium atmosphere. Additional safeguards used to monitor radiation levels include, but are not limited to, continuous air monitoring, hand-held radiation monitoring devices, and hand, foot, and full body contamination monitoring. Due to radiological hazards  $^{237}\text{Np}$  presents, it is not possible to have elemental analyses performed by a third-party laboratory.

**1.1 Materials.** The solvent THF was dried over molecular sieves and sodium-potassium alloy (NaK) prior to use; the solvents pentane, fluorobenzene,  $\text{C}_6\text{H}_6$  and  $\text{C}_6\text{D}_6$  were dried over molecular sieves prior to use.  $\text{C}_6\text{D}_6$  was purchased from Cambridge Isotope Laboratories.  $\text{UCl}_4$ ,<sup>1</sup>  $(\text{dme})_2\text{NpCl}_4$ ,<sup>2</sup> 4,7-dimethyl-1,3-bis(1-methylethyl)-1*H*-indene ( $1,3\text{-iPr}_2\text{-4,7-Me}_2\text{-C}_9\text{H}_3$ ),<sup>3</sup> and trimethylsilyl-(di-*tert*-butyl)-phosphine ( $^t\text{Bu}_2\text{PSiMe}_3$ )<sup>4, 5</sup> were synthesized from previously reported procedures. 2,6-pyridinedicarboxaldehyde (97%), 4,4'-di-*tert*-butyl-2,2'-bipyridyl (dtbpy), and potassium bis(trimethylsilyl)amide (KHMDs) were purchased from commercial sources (e.g., Sigma) and used as received after degassing and bringing into the inert atmosphere gloveboxes.

**1.2 General Considerations.** All air- and moisture-sensitive  $^{238}\text{U}$  manipulations were carried out in an MBraun dry box containing a purified argon atmosphere. All air- and moisture-sensitive  $^{237}\text{Np}$  manipulations were carried out in an MBraun negative-pressure dry box containing a purified helium atmosphere.  $^1\text{H}$  and  $^{31}\text{P}$  NMR spectra were recorded on a Bruker Avance 400 MHz spectrometer operating at 400.132 MHz and 161.978 MHz, respectively. All  $^1\text{H}$  chemical shifts are reported relative to  $\text{SiMe}_4$ . Paramagnetically broadened resonances have the peak-width at half-height recorded in parenthesis following the  $\delta$ ; integration and splitting is reported when able to assign the resonances with reasonable confidence, such as in the case of the PtBu<sub>2</sub> moiety. CHN analyses were conducted by the University of Rochester CENTC Elemental Analysis Facility, B14 Hutchison Hall, 120 Trustee Road, Rochester, NY 14627 and analyzed by William W. Brennessel. Uranium UV/Vis/NIR spectra were collected at RT on a Cary 5000 UV-Vis-NIR spectrophotometer from Agilent Technologies. Neptunium UV/Vis/NIR spectra were collected at RT on a Varian Cary 6000i UV/vis/NIR spectrometer. Extreme caution must be used when making solution neptunium UV/Vis/NIR samples to ensure no radiological contamination occurs on the outside of the cuvette, and previously described methods for the handling of such samples were used.<sup>6</sup>

Single crystals of uranium complexes suitable for X-ray diffraction were coated with Krytox<sup>TM</sup> in a dry box, placed on a nylon loop and then transferred to a goniometer head of a Bruker D8 Quest diffractometer equipped with a Mo  $\text{K}\alpha$  X-ray tube ( $\lambda = 0.01073 \text{ \AA}$ ) I $\mu$ S 3.0 Microfocus source X-ray generator.<sup>7</sup> Single crystals of neptunium complexes suitable for X-ray diffractions were coated with Krytox<sup>TM</sup> and mounted inside a 0.5 mm quartz capillary from Charles Supper. To prevent radiation contamination, the quartz capillaries were inserted into a test tube via silicon stoppers to

allow for handling of the capillaries while inserting crystalline material. As the capillaries are too long to mount on a goniometer head, the capillaries are carefully cut with nail clippers to a more appropriate size prior to sealing with hot capillary wax. After removal from the dry box, the capillaries are coated in clear nail polish to provide shatter-resilience. The capillaries are then transferred to a goniometer head of a Bruker D8 Quest diffractometer equipped with a Mo K $\alpha$  X-ray tube ( $\lambda = 0.01073 \text{ \AA}$ ) I $\mu$ S 3.0 Microfocus source X-ray generator.<sup>7</sup> A hemisphere routine was used for data collection and determination of lattice constants. The space group was identified and the data were processed using the Bruker SAINT+ program and corrected for absorption using SADABS.<sup>8-10</sup> The structures were solved using direct methods (SHELXS) completed by subsequent Fourier synthesis and refined by full-matrix least-squares procedures.<sup>11, 12</sup> Olex2 software was used as the graphical interface.<sup>13, 14</sup> Crystallographic data for all structures is available from the Cambridge Structural Database.

**1.3 Computational Descriptions.** *Density Functional Theory (DFT) Calculations.* Geometry optimizations of complexes **1-4** were performed on AMS version 2022.101 with no symmetry or geometry constraints.<sup>15</sup> Additionally, models for **1** and **2** were also optimized by removing the methyl groups from the ONO ligand. At first, the level of theory consisted of the generalized gradient approximation (GGA) Perdew-Burke-Ernzerhof (PBE) functional in conjunction with Slate-type basis functions (STO) triple- $\zeta$  plus polarization (TZP).<sup>16</sup> The resulting optimized coordinates were used as input for a second optimization step using the hybrid Becke, 3-parameter, Lee-Yang-Parr exchange-correlation B3LYP functional (25% of Hartree-Fock (HF) exchange).<sup>17, 18</sup> Scalar relativistic effects (SR) were incorporated through the zeroth-order relativistic approximation (ZORA) Hamiltonian.<sup>19</sup> The optimized structures were confirmed to be true minima by analytical vibrational frequency calculations. The natural localized molecular orbital (NLMO) analysis was further performed in the standalone version of NBO 7.0 to get a more accurate picture of the bonding in these systems.<sup>20</sup> The extended transition state (ETS) combined with the natural orbitals for chemical valence (NOCV) theory, along with the second-order perturbation analysis in NBO basis were also performed to analyze the nature of the different An-ligand interactions and to estimate their energetic importance.<sup>21</sup> Time-dependent DFT (TD-DFT) calculations were carried out to identify the transitions involved in the absorption spectra. The lowest 300 excitations were obtained employing the PBE, as well as the B3LYP, functionals.

*Wavefunction Calculations.* All the complexes were subjected to wavefunction calculations using the ORCA 5.0.3 package.<sup>22</sup> In a first step, DFT densities obtained at B3LYP/def2-TZVP level of theory were calculated to serve as starting points for the multiconfigurational calculations.<sup>23</sup> The metal center was described with the SARC-DKH-TZVP basis set.<sup>24</sup> SR effects were incorporated via the second-order Douglas-Kroll-Hess (DKH) Hamiltonian.<sup>25</sup> In a second step, state average (SA) complete active space self-consistent field (CASSCF) calculations were performed using the basis sets and SR approximation previously defined.<sup>26</sup> At this point, the static correlation that arises from the unpaired electrons being distributed among near-degenerate  $5f$  shell is accounted for. The first active space consisted of  $n$  electrons ( $n = 2,3$  for  $U^{4+}$  and  $Np^{4+}$ , in seven  $5f$  orbitals (CAS( $n,7$ )) (**Figure S1**). All the possible configuration state functions (CSF) were considered. For the uranium complexes **1** and **3**, 21 and 28 CSF were included for the triplets and singlets, respectively. In the case of the neptunium complexes **2** and **4**, 35 and 112 CSF were included for the quartet and doublets, respectively. A second active space that incorporates ligand orbitals was also pursued. The idea was to incorporate their bonding and antibonding counterparts in order to keep the



balance of the active space. These orbitals corresponded to 2 low-lying bonding orbitals plus their antibonding equivalents coming from the dtbpy and indenide ligands (CAS(n+4,11) (**Figure S2**). Convergence was achieved for the systems containing the indenide ligand. However, for those having coordinated the dtbpy ligand, just the minimum active space converged. This means that more ligand orbitals need to be included into the active space, which becomes impractical from a computational perspective. After the CASSCF calculations converged, the N-electron valence state second-order perturbation theory (NEVPT2) method was employed to account for the so-called dynamic correlation.<sup>27</sup> Finally, the spin-orbit (SO) coupling was included via quasi-degenerate perturbation theory (QDPT) employing the NEVPT2 diagonal energies.

*Spectra Broadening.* The SO-CASSCF/NEVPT2 calculated energies and oscillator strengths were subjected to Gaussian broadening. Initially, the energies in wavenumbers were considered to perform the broadening process with a full width at half-maximum (FWHM) equal to 227 cm<sup>-1</sup> (~0.03 eV). As final step, the energies were converted to wavelengths (nm) to match the experimental data.

**1.4 Synthesis of (<sup>t</sup>Bu<sup>2</sup>P)ONO)NpCl<sub>2</sub>(dtbpy), 2.** A 20 mL scintillation vial was loaded with a stir bar, (dme)<sub>2</sub>NpCl<sub>4</sub> (20.9 mg, 0.037 mmol), 2,6-pyridinedicarboxaldehyde (5.1 mg, 0.038 mmol) and THF (1 mL). The reaction was allowed to mix at room temperature for 5 minutes, wherein the solution turns pale pink (**Figure S18**). The additions of <sup>t</sup>Bu<sub>2</sub>PSiMe<sub>3</sub> (18.2 mg, 0.083 mmol) to this pale pink solution resulted in a color change to golden yellow (**Figure S19**), where this solution was allowed to mix at room temperature for 5 minutes. All volatiles were then removed under reduced pressure, and the remaining solid was washed with THF (1 mL). The volatiles were once again removed under reduced pressure. To the remaining solid was added dtbpy (10.1 mg, 0.038 mmol) and fluorobenzene (250 μL). The resulting solution changed to a pale peach color (**Figure S20**). The solution was then filtered and stored at -35 °C, wherein crystalline material was observed after 10 days. Crystalline material was collected in 46% yield. Analysis for (<sup>t</sup>Bu<sup>2</sup>P)ONO)NpCl<sub>2</sub>(dtbpy). <sup>1</sup>H NMR (C<sub>6</sub>D<sub>6</sub>, 23 °C) δ 65.50 (s, 47 Hz), 54.43 (s, 26 Hz), 16.23 (s, 9 Hz), 15.08 (d, *J* = 6 Hz), 13.05 (d, *t*BuP, 18 H, *J* = 10 Hz), 10.27 (s, 9 Hz), 9.21 (d, *J* = 6 Hz), 2.42 (s, *t*Bu<sub>bp</sub> 18H, 6Hz), -1.86 (d, *t*BuP, 18 H, *J* = 10 Hz), -6.69 (s, 21 Hz). <sup>31</sup>P NMR (C<sub>6</sub>D<sub>6</sub>, 23 °C) δ 79.3. UV/vis/NIR (C<sub>6</sub>H<sub>6</sub>:C<sub>6</sub>D<sub>6</sub> 60:40, 1.6 mM, 25 °C, L·mol<sup>-1</sup>·cm<sup>-1</sup>): 511 nm (ε = 77.5), 640 nm (ε = 63.1), 740 nm (ε = 83.8), 816 nm (ε = 47.5), 900 nm (ε = 75.0), and 966 nm (ε = 73.8).

**1.5 Synthesis of (1,3-*i*Pr<sub>2</sub>-4,7-Me<sub>2</sub>-C<sub>9</sub>H<sub>3</sub>)(<sup>t</sup>Bu<sup>2</sup>P)ONO)UCl, 3.** A 20 mL scintillation vial was charged with a stir bar, (50 mg, 0.13 mmol) of UCl<sub>4</sub>, 2,6-pyridinedicarboxaldehyde (18 mg, 0.13 mmol) and THF (1 mL). The reaction was allowed to mix at room temperature for 20 min, where a tan slurry is formed. <sup>t</sup>Bu<sub>2</sub>PSiMe<sub>3</sub> (60 mg, 0.27 mmol) was added to this tan slurry and the resulting bright green solution was allowed to mix at RT for 20 min prior to removing all volatiles under reduced pressure. During this time, to a second 20 mL was added 1,3-(*i*Pr<sub>2</sub>)<sub>2</sub>-4,7-Me<sub>2</sub>-C<sub>9</sub>H<sub>3</sub> (30 mg, 0.13 mmol) and THF (5 mL) followed by KHMDS (26 mg, 0.13 mmol), resulting in an immediate color change from a clear to yellow solution. All volatiles were removed under reduced pressure after mixing 5 min at room temperature. The remaining solids from both the uranium solution and the deprotonated indene solution were dissolved in THF (1 mL). The deprotonated indene solution was added dropwise to the uranium solution, and the vial was washed 3 x 1 mL THF. The resulting solution, which turned dark red in color, was allowed to mix at RT for 3 hr. Volatiles were removed under reduced pressure, and the resulting red material was dissolved in

pentane (5 mL). This solution was then filtered to remove any KCl salts. The remaining salt-free solution was then concentrated to approximately 1 mL under reduced pressure, and then stored at -35 °C. Crystalline material of **3** was isolated from this solution. (<sup>OTMS</sup>PNO<sup>tBu</sup>)UCl<sub>2</sub>(η<sup>5</sup>-C<sub>9</sub>H<sub>3</sub>-1,3-(iPr<sub>2</sub>)<sub>2</sub>-4,7-Me<sub>2</sub> (**3b**, (<sup>OTMS</sup>PNO<sup>tBu</sup> = 2-((trimethylsiloxy)(*tert*-butylphosphino)-methyl-6-((*tert*-butylphosphino-methanolato)pyridine)) could be isolated from this reaction, though in limited quantities and is a likely contaminant of **3** (see SI Section 3 for more details). Further characterization of **3b** was not pursued. Crystallization of **3** from diethyl ether produced crystalline material of **3** that was collected in 61% yield. Analysis for (1,3-(iPr<sub>2</sub>)<sub>2</sub>-4,7-Me<sub>2</sub>-C<sub>9</sub>H<sub>3</sub>)(<sup>tBu2P</sup>ONO)UCl. Calculated: C = 51.86%, H = 6.96%, N = 1.51%. Found: C = 49.23%, H = 6.87%, N = 1.36%. <sup>1</sup>H NMR (C<sub>6</sub>D<sub>6</sub>, 23 °C) δ 78.90 (s, 15Hz), 44.75 (s, 27 Hz), 32.21 (s, 27Hz, 18H, *t*BuP), 27.02 (s, 17Hz, 6H, *i*Pr), 9.93 (s, 8Hz, 6H, *i*Pr), -1.61 (s, 11 Hz), -2.97 (d, 18H, *t*BuP, *J* = 6 Hz), -5.72 (d, *J* = 3 Hz, 6 Hz), -6.35 (s, 160 Hz), -18.98 (s, 4 Hz), -21.25 (s, 19 Hz), -64.31 (s, 17 Hz) <sup>31</sup>P NMR (C<sub>6</sub>D<sub>6</sub>, 23 °C) δ 81.8. UV/vis/NIR (toluene, 10 mM, 25 °C, L·mol<sup>-1</sup>·cm<sup>-1</sup>): 507 nm (ε = 452.3), 636 nm (ε = 125.1), 670 nm (ε = 91.4), 1018 nm (ε = 36.4), 1085 nm (ε = 44.2), and 1139 nm (ε = 69.6).

**1.6 Synthesis of (1,3-*i*Pr<sub>2</sub>-4,7-Me<sub>2</sub>-C<sub>9</sub>H<sub>3</sub>)(<sup>tBu2P</sup>ONO)NpCl, **4**.** 1,3-*i*Pr<sub>2</sub>-4,7-Me<sub>2</sub>-C<sub>9</sub>H<sub>3</sub> (8.5 mg, 0.037 mmol) was deprotonated with KHMDS (7.5 mg, 0.038 mmol) in THF in an argon-filled, positive pressure dry box. The volatiles were then removed under reduced pressure. This vial was then transferred to a transuranic, helium-filled, negative pressure dry box. A 20 mL scintillation vial was charged with a stir bar, (dme)<sub>2</sub>NpCl<sub>4</sub> (20.2 mg, 0.036 mmol), 2,6-pyridine dicarboxaldehyde (4.9 mg, 0.037 mmol), and THF (1 mL). The resulting pale pink solution was allowed to mix at room temperature for 5 min prior to the addition of <sup>t</sup>Bu<sub>2</sub>PSiMe<sub>3</sub> (18.3 mg, 0.084 mmol). The resulting golden yellow solution was allowed to mix at room temperature for 5 min. All volatiles were then removed under reduced pressure. Vials containing both the Np material and the deprotonated indene were dissolved in THF (1 mL). The deprotonated indene solution was then added dropwise to the Np solution. The vial containing the indene solution was washed with THF (3 x 1 mL), and the washings were added to the Np solution. The addition of the deprotonated indene to the Np solution resulted in an immediate color change to a dark, almost indistinguishable, solution (**Figures S18-19, S22-23**). After 5 min of mixing at room temperature, all volatiles were removed under reduced pressure. The resulting material was dissolved in approximately 500 μL pentane. This solution was then filtered to remove any KCl. The resulting solution was stored at -35 °C until crystalline material was observed. Crystalline material was collected in 12% yield. Analysis of (<sup>tBu2P</sup>ONO)NpCl(η<sup>5</sup>-C<sub>9</sub>H<sub>3</sub>-1,3-(iPr<sub>2</sub>)<sub>2</sub>-4,7-Me<sub>2</sub>). <sup>1</sup>H NMR (C<sub>6</sub>D<sub>6</sub>, 23 °C) δ 51.91 (s, 60 Hz), 24.67 (s, 43 Hz), 15.37 (s, 57 Hz), 13.96 (s, 13 Hz), 10.07 (s, 5 Hz), 9.35 (d, *J* = 7 Hz, 15 Hz), 8.80 (d, 18H, *J* = 8 Hz, *t*BuP), 6.56 (s, 6H, *i*Pr, 26 Hz), 4.61 (d, *J* = 5 Hz, 21 Hz), -2.42 (s, 10 Hz), -11.34 (s, 6 Hz). <sup>31</sup>P NMR (C<sub>6</sub>D<sub>6</sub>, 23 °C) δ 72.7. UV/vis/NIR (C<sub>6</sub>H<sub>6</sub>:C<sub>6</sub>D<sub>6</sub> 60:40, 1.2 mM, 25 °C, L·mol<sup>-1</sup>·cm<sup>-1</sup>): 572 nm (ε = 391.7), 725 nm (ε = 162.5), 817 nm (ε = 97.5), 881 nm (ε = 130.8), 904 nm (ε = 152.5), and 985 nm (ε = 73.3).

## 2. Theoretical Descriptions

### 2.1 Tables

**Table S1.** Calculated and experimental An-Cl, An-N, and An-O bond lengths for **1** and **2**. Distances are given in Å. The optimized cartesian coordinates of these systems are detailed in **Table S16**.

|                 | <b>1</b>    |                |                  | <b>2</b>    |                |                  |
|-----------------|-------------|----------------|------------------|-------------|----------------|------------------|
|                 | <b>Exp.</b> | <b>PBE/TZP</b> | <b>B3LYP/TZP</b> | <b>Exp.</b> | <b>PBE/TZP</b> | <b>B3LYP/TZP</b> |
| An – Cl         | 2.669       | 2.618          | 2.636            | 2.651       | 2.626          | 2.625            |
| An – N1 (dtbpy) | 2.625       | 2.600          | 2.644            | 2.604       | 2.608          | 2.618            |
| An – N2 (dtbpy) | 2.613       | 2.572          | 2.642            | 2.570       | 2.605          | 2.617            |
| An – N (ONO)    | 2.479       | 2.496          | 2.489            | 2.463       | 2.500          | 2.496            |
| An – O1 (ONO)   | 2.174       | 2.177          | 2.177            | 2.153       | 2.180          | 2.165            |
| An – O2 (ONO)   | 2.159       | 2.169          | 2.173            | 2.147       | 2.171          | 2.162            |

**Table S2.** Calculated and experimental An-Cl, An-N, An-O, and An-Centroid bond lengths for **3** and **4**. Distances are given in Å. The optimized cartesian coordinates of these systems are detailed in **Table S17**.

|               | <b>3</b>    |                |                  | <b>4</b>    |                |                  |
|---------------|-------------|----------------|------------------|-------------|----------------|------------------|
|               | <b>Exp.</b> | <b>PBE/TZP</b> | <b>B3LYP/TZP</b> | <b>Exp.</b> | <b>PBE/TZP</b> | <b>B3LYP/TZP</b> |
| An – Cl       | 2.603       | 2.597          | 2.597            | -           | 2.592          | 2.585            |
| An – Centroid | 2.477       | 2.487          | 2.476            | -           | 2.481          | 2.458            |
| An – N (ONO)  | 2.466       | 2.477          | 2.524            | -           | 2.488          | 2.479            |
| An – O1 (ONO) | 2.132       | 2.154          | 2.149            | -           | 2.163          | 2.147            |
| An – O2 (ONO) | 2.123       | 2.152          | 2.149            | -           | 2.163          | 2.146            |

**Table S3.** Calculated and experimental An-Cl, An-N, and An-O, bond lengths for the truncated structures of **1** and **2** (**model**). Distances are given in Å. The optimized cartesian coordinates of these systems are detailed in **Table S18**.

|                 | <b>1</b>    | <b>1 model</b>   | <b>2</b>    | <b>2 model</b>   |
|-----------------|-------------|------------------|-------------|------------------|
|                 | <b>Exp.</b> | <b>B3LYP/TZP</b> | <b>Exp.</b> | <b>B3LYP/TZP</b> |
| An – Cl         | 2.669       | 2.649            | 2.651       | 2.628            |
| An – N1 (dtbpy) | 2.625       | 2.566            | 2.604       | 2.611            |
| An – N2 (dtbpy) | 2.613       | 2.589            | 2.570       | 2.607            |
| An – N (ONO)    | 2.479       | 2.498            | 2.463       | 2.497            |
| An – O1 (ONO)   | 2.174       | 2.155            | 2.153       | 2.160            |
| An – O2 (ONO)   | 2.159       | 2.159            | 2.147       | 2.158            |

Experimentally, a small decrease of the An-ONO bond lengths was observed after replacing the dtbpy by the indenide ligand. These changes were more pronounced in the An-O bonds (range of 0.036 – 0.042 Å for uranium complexes **1** and **3**). The geometry optimization process was able to reproduce this shrinking in the uranium systems with predicted values of 0.024 – 0.028 Å. Since no crystallographic data is available for **4**, the optimized geometries (**2** and **4**) confirm the same conclusion for the neptunium complexes (**Table S1** and **Table S2**).

The origin of this decrease in bond length could come from either the difference in the steric bulk of the ligand or the difference in chemical bonding. To differentiate them, simplified structures (**1 model** and **2 model**) with fewer steric interactions but the same chemical bonding environment were modeled. The model removed the six methyl groups of the tert-butyl branches of the ONO ligand, thus reducing the steric interaction between this and the dtbpy ligand. By comparing the geometric data (Table S3) of the model complex and its parent compound, **1** vs. **1 model** and **2** vs. **2 model**, it reveals a decrease of the An – ONO, as well as the An – dtbpy bond distances, as the steric hindrance is decreased in the complexes. This confirms the steric factor is important in complexes **1** and **2**, preventing the systems from becoming more compacted in the parent complexes. However, by comparing the **1 model** vs. **2 model**, the An – ONO bonds are nearly identical, hence further concluding the impact on the bond length change from the steric factor of the coordinating ligands. Conversely, when the indenide ligand is employed, it coordinates preferentially trans to the ONO moiety (since the symmetry of the 5-member ring is appropriate to interact with the *f* orbitals of the An center), allowing a better arrangement of the ligands around the metal.

Despite the small changes in the bond lengths, no significant differences were found in terms of An-O and An-N bond orders between dtbpy and indenide complexes (**Tables S12-15, S19**). In fact, the uranium complexes are identical, while almost negligible differences were found in case of the neptunium complexes (**Figure 4, Table S12-S15**). This means that the bond order is not sensitive to this small perturbation in the bond lengths.

**Table S4.** SO-CAS(2,7)SCF/NEVPT2 states for **1**. The assignment was done in terms of J and the composition of each state shows the RS terms with higher contributions. The first band corresponds to the ground manifold (GM) and the first state of this manifold is the SO-GS (highlighted in gray). The other bands (corresponding to the excited manifolds) were labeled with capital letters from A to H.

| Band | J | Composition                                 | Energy (cm <sup>-1</sup> ) | Energy (nm) |
|------|---|---------------------------------------------|----------------------------|-------------|
|      |   | <b>88% <sup>3</sup>H + 8% <sup>1</sup>G</b> | <b>0.00</b>                | <b>-</b>    |
|      |   | 86% <sup>3</sup> H + 7% <sup>1</sup> G      | 275.24                     | 36331.9     |
|      |   | 85% <sup>3</sup> H + 8% <sup>1</sup> G      | 537.17                     | 18616.1     |
|      |   | 85% <sup>3</sup> H + 10% <sup>1</sup> G     | 694.35                     | 14402.0     |
| GM   | 4 | 86% <sup>3</sup> H + 8% <sup>1</sup> G      | 903.44                     | 11068.8     |
|      |   | 84% <sup>3</sup> H + 9% <sup>1</sup> G      | 1310.15                    | 7632.7      |
|      |   | 82% <sup>3</sup> H + 8% <sup>1</sup> G      | 1580.97                    | 6325.2      |
|      |   | 85% <sup>3</sup> H + 9% <sup>1</sup> G      | 1872.48                    | 5340.5      |
|      |   | 86% <sup>3</sup> H + 9% <sup>1</sup> G      | 1955.64                    | 5113.4      |
|      |   | 59% <sup>3</sup> F + 12% <sup>1</sup> D     | 4850.58                    | 2061.6      |
|      |   | 67% <sup>3</sup> F + 13% <sup>1</sup> D     | 5174.41                    | 1932.6      |
| A    | 2 | 75% <sup>3</sup> F + 7% <sup>1</sup> D      | 5266.26                    | 1898.9      |
|      |   | 51% <sup>3</sup> F + 7% <sup>1</sup> D      | 5423.75                    | 1843.7      |
|      |   | 63% <sup>3</sup> F + 10% <sup>1</sup> D     | 5473.81                    | 1826.9      |
|      |   | 92% <sup>3</sup> H                          | 6243.39                    | 1601.7      |
|      |   | 78% <sup>3</sup> H                          | 6251.92                    | 1599.5      |
|      |   | 90% <sup>3</sup> H                          | 6461.53                    | 1547.6      |
|      |   | 92% <sup>3</sup> H                          | 6495.23                    | 1539.6      |
|      |   | 84% <sup>3</sup> H                          | 6841.29                    | 1461.7      |
| B    | 5 | 71% <sup>3</sup> H                          | 7068.38                    | 1414.8      |
|      |   | 73% <sup>3</sup> H                          | 7317.50                    | 1366.6      |
|      |   | 95% <sup>3</sup> H                          | 7434.65                    | 1345.1      |
|      |   | 84% <sup>3</sup> H                          | 7533.98                    | 1327.3      |
|      |   | 88% <sup>3</sup> H                          | 7567.87                    | 1321.4      |
|      |   | 78% <sup>3</sup> H                          | 7596.96                    | 1316.3      |
|      |   | 56% <sup>3</sup> F + 13% <sup>1</sup> G     | 9400.47                    | 1063.8      |
|      |   | 36% <sup>3</sup> F + 34% <sup>1</sup> G     | 9622.19                    | 1039.3      |
|      |   | 65% <sup>3</sup> F + 15% <sup>1</sup> G     | 9662.73                    | 1034.9      |
| C    | 3 | 74% <sup>3</sup> F + 11% <sup>1</sup> G     | 9671.26                    | 1034.0      |
|      |   | 68% <sup>3</sup> F + 9% <sup>1</sup> G      | 9781.97                    | 1022.3      |
|      |   | 78% <sup>3</sup> F + 4% <sup>1</sup> G      | 9835.25                    | 1016.8      |

|   |   |                                         |          |        |
|---|---|-----------------------------------------|----------|--------|
|   |   | 68% <sup>3</sup> F + 9% <sup>1</sup> G  | 9947.77  | 1005.3 |
|   |   | 57% <sup>3</sup> F + 16% <sup>1</sup> G | 10007.25 | 999.3  |
|   |   | 40% <sup>3</sup> F + 33% <sup>1</sup> G | 10106.64 | 989.4  |
|   |   | 42% <sup>3</sup> F + 33% <sup>1</sup> G | 10108.15 | 989.3  |
|   |   | 71% <sup>3</sup> F + 19% <sup>1</sup> G | 10340.39 | 967.1  |
| D | 4 | 63% <sup>3</sup> F + 25% <sup>1</sup> G | 10382.18 | 963.2  |
|   |   | 46% <sup>3</sup> F + 35% <sup>1</sup> G | 10482.85 | 953.9  |
|   |   | 47% <sup>3</sup> F + 30% <sup>1</sup> G | 10746.56 | 930.5  |
|   |   | 60% <sup>3</sup> F + 29% <sup>1</sup> G | 10964.10 | 912.1  |
|   |   | 62% <sup>3</sup> F + 27% <sup>1</sup> G | 10978.05 | 910.9  |
|   |   | 72% <sup>3</sup> H                      | 11299.58 | 885.0  |
|   |   | 75% <sup>3</sup> H                      | 11380.10 | 878.7  |
|   |   | 81% <sup>3</sup> H                      | 11513.15 | 868.6  |
|   |   | 88% <sup>3</sup> H                      | 11580.39 | 863.5  |
|   |   | 86% <sup>3</sup> H                      | 11890.21 | 841.0  |
|   |   | 82% <sup>3</sup> H                      | 12191.56 | 820.2  |
| E | 6 | 76% <sup>3</sup> H                      | 12448.15 | 803.3  |
|   |   | 81% <sup>3</sup> H                      | 12734.02 | 785.3  |
|   |   | 76% <sup>3</sup> H                      | 12767.03 | 783.3  |
|   |   | 78% <sup>3</sup> H                      | 13041.30 | 766.8  |
|   |   | 75% <sup>3</sup> H                      | 13086.32 | 764.2  |
|   |   | 64% <sup>3</sup> H                      | 13209.32 | 757.0  |
|   |   | 67% <sup>3</sup> H                      | 13222.82 | 756.3  |
|   |   | 44% <sup>3</sup> F + 41% <sup>1</sup> G | 16425.56 | 608.8  |
|   |   | 46% <sup>3</sup> F + 39% <sup>1</sup> G | 16619.35 | 601.7  |
|   |   | 36% <sup>3</sup> F + 42% <sup>1</sup> G | 16666.29 | 600.0  |
|   |   | 39% <sup>3</sup> F + 36% <sup>1</sup> G | 16893.04 | 592.0  |
| F | 4 | 10% <sup>3</sup> F + 21% <sup>1</sup> G | 16955.97 | 589.8  |
|   |   | 41% <sup>3</sup> F + 41% <sup>1</sup> G | 17046.54 | 586.6  |
|   |   | 24% <sup>3</sup> F + 19% <sup>1</sup> G | 17113.03 | 584.4  |
|   |   | 40% <sup>3</sup> F + 42% <sup>1</sup> G | 17164.58 | 582.6  |
|   |   | 22% <sup>3</sup> F + 19% <sup>1</sup> G | 17278.75 | 578.7  |
|   |   | 41% <sup>3</sup> F + 44% <sup>1</sup> D | 17729.82 | 564.0  |
|   |   | 42% <sup>3</sup> F + 50% <sup>1</sup> D | 17839.47 | 560.6  |
| G | 2 | 59% <sup>3</sup> P + 15% <sup>1</sup> D | 18017.28 | 555.0  |
|   |   | 41% <sup>3</sup> P + 33% <sup>1</sup> D | 18114.86 | 552.0  |
|   |   | 35% <sup>3</sup> P + 27% <sup>1</sup> D | 18406.05 | 543.3  |

H 0 70% <sup>3</sup>P + 7% <sup>1</sup>S 18529.97 539.7

**Table S5.** SO-CAS(6,11)SCF/NEVPT2 states for **3**. The assignment was done in terms of J and the composition of each state shows the RS terms with higher contributions. The first band corresponds to the ground manifold (GM) and the first state of this manifold is the SO-GS (highlighted in gray). The other bands (corresponding to the excited manifolds) were labeled with capital letters from A to H.

| Band | J | CAS(6,11)SCF/NEVPT2                         |                            | CAS(2,7)SCF/NEVPT2 |                            |             |
|------|---|---------------------------------------------|----------------------------|--------------------|----------------------------|-------------|
|      |   | Composition                                 | Energy (cm <sup>-1</sup> ) | Energy (nm)        | Energy (cm <sup>-1</sup> ) | Energy (nm) |
|      |   | <b>84% <sup>3</sup>H + 7% <sup>1</sup>G</b> | 0.00                       | -                  | 0                          | -           |
|      |   | 84% <sup>3</sup> H + 8% <sup>1</sup> G      | 94.59                      | 105719.4           | 94.54                      | 105775.333  |
|      |   | 86% <sup>3</sup> H + 9% <sup>1</sup> G      | 695.80                     | 14371.9            | 695.8                      | 14371.946   |
|      |   | 86% <sup>3</sup> H + 8% <sup>1</sup> G      | 1022.21                    | 9782.7             | 1022.2                     | 9782.72566  |
| GM   | 4 | 84% <sup>3</sup> H + 6% <sup>1</sup> G      | 1100.28                    | 9088.6             | 1100.3                     | 9088.59563  |
|      |   | 81% <sup>3</sup> H + 8% <sup>1</sup> G      | 1863.31                    | 5366.8             | 1863.3                     | 5366.7935   |
|      |   | 81% <sup>3</sup> H + 10% <sup>1</sup> G     | 1864.44                    | 5363.5             | 1864.4                     | 5363.5408   |
|      |   | 82% <sup>3</sup> H + 9% <sup>1</sup> G      | 1982.82                    | 5043.3             | 1982.8                     | 5043.32214  |
|      |   | 83% <sup>3</sup> H + 9% <sup>1</sup> G      | 2011.06                    | 4972.5             | 2011.1                     | 4972.50206  |
|      |   | 41% <sup>3</sup> F + 8% <sup>1</sup> D      | 5101.07                    | 1960.4             | 5101.1                     | 1960.37302  |
|      |   | 61% <sup>3</sup> F + 9% <sup>1</sup> D      | 5364.99                    | 1863.9             | 5365                       | 1863.93637  |
| A    | 2 | 63% <sup>3</sup> F + 9% <sup>1</sup> D      | 5480.46                    | 1824.7             | 5480.5                     | 1824.66435  |
|      |   | 58% <sup>3</sup> F + 9% <sup>1</sup> D      | 5581.95                    | 1791.5             | 5582                       | 1791.48864  |
|      |   | 71% <sup>3</sup> F + 10% <sup>1</sup> D     | 5717.96                    | 1748.9             | 5718                       | 1748.87547  |
|      |   | 93% <sup>3</sup> H                          | 6059.42                    | 1650.3             | 6059.4                     | 1650.32297  |
|      |   | 63% <sup>3</sup> H                          | 6291.82                    | 1589.4             | 6291.8                     | 1589.36524  |
|      |   | 81% <sup>3</sup> H                          | 6741.21                    | 1483.4             | 6741.2                     | 1483.41322  |
|      |   | 76% <sup>3</sup> H                          | 6960.42                    | 1436.7             | 6960.4                     | 1436.69491  |
|      |   | 77% <sup>3</sup> H                          | 7038.71                    | 1420.7             | 7038.7                     | 1420.71488  |
| B    | 5 | 86% <sup>3</sup> H                          | 7399.13                    | 1351.5             | 7399.1                     | 1351.51025  |
|      |   | 89% <sup>3</sup> H                          | 7453.32                    | 1341.7             | 7453.3                     | 1341.68397  |
|      |   | 75% <sup>3</sup> H                          | 7877.43                    | 1269.4             | 7877.4                     | 1269.44955  |
|      |   | 92% <sup>3</sup> H                          | 7936.89                    | 1259.9             | 7936.9                     | 1259.93935  |
|      |   | 84% <sup>3</sup> H                          | 7980.15                    | 1253.1             | 7980.2                     | 1253.10928  |
|      |   | 94% <sup>3</sup> H                          | 8027.53                    | 1245.7             | 8027.5                     | 1245.71319  |
|      |   | 59% <sup>3</sup> F + 16% <sup>1</sup> G     | 9742.77                    | 1026.4             | 9742.8                     | 1026.40214  |
| C    | 3 | 49% <sup>3</sup> F + 14% <sup>1</sup> G     | 9755.97                    | 1025.0             | 9756                       | 1025.0134   |
|      |   | 64% <sup>3</sup> F + 11% <sup>1</sup> G     | 9934.17                    | 1006.6             | 9934.2                     | 1006.62662  |

|   |   |                                         |          |       |       |            |
|---|---|-----------------------------------------|----------|-------|-------|------------|
|   |   | 37% <sup>3</sup> F + 19% <sup>1</sup> G | 10001.07 | 999.9 | 10001 | 999.893011 |
|   |   | 74% <sup>3</sup> F + 11% <sup>1</sup> G | 10063.57 | 993.7 | 10064 | 993.683156 |
|   |   | 50% <sup>3</sup> F + 31% <sup>1</sup> G | 10100.32 | 990.1 | 10100 | 990.067641 |
|   |   | 35% <sup>3</sup> F + 31% <sup>1</sup> G | 10140.43 | 986.2 | 10140 | 986.151475 |
|   |   | 38% <sup>3</sup> F + 17% <sup>1</sup> G | 10235.2  | 977.0 | 10235 | 977.020478 |
|   |   | 55% <sup>3</sup> F + 23% <sup>1</sup> G | 10312.37 | 969.7 | 10312 | 969.709194 |
|   |   | 64% <sup>3</sup> F + 8% <sup>1</sup> G  | 10383.13 | 963.1 | 10383 | 963.100722 |
|   |   | 66% <sup>3</sup> F + 19% <sup>1</sup> G | 10496.29 | 952.7 | 10496 | 952.717579 |
| D | 4 | 58% <sup>3</sup> F + 26% <sup>1</sup> G | 10529.99 | 949.7 | 10530 | 949.668518 |
|   |   | 51% <sup>3</sup> F + 18% <sup>1</sup> G | 10805.01 | 925.5 | 10805 | 925.496598 |
|   |   | 50% <sup>3</sup> F + 25% <sup>1</sup> G | 10842.25 | 922.3 | 10842 | 922.317785 |
|   |   | 41% <sup>3</sup> F + 26% <sup>1</sup> G | 10907.78 | 916.8 | 10908 | 916.776833 |
|   |   | 61% <sup>3</sup> F + 26% <sup>1</sup> G | 10924.74 | 915.4 | 10925 | 915.353592 |
|   |   | 61% <sup>3</sup> H                      | 11378.29 | 878.9 | 11378 | 878.866684 |
|   |   | 53% <sup>3</sup> H                      | 11476.5  | 871.3 | 11477 | 871.345794 |
|   |   | 61% <sup>3</sup> H                      | 12022.47 | 831.8 | 12022 | 831.775833 |
|   |   | 63% <sup>3</sup> H                      | 12202.82 | 819.5 | 12203 | 819.48271  |
|   |   | 61% <sup>3</sup> H                      | 12363.14 | 808.9 | 12363 | 808.856003 |
|   |   | 69% <sup>3</sup> H                      | 12652.57 | 790.4 | 12653 | 790.353264 |
| E | 6 | 71% <sup>3</sup> H                      | 12695.36 | 787.7 | 12695 | 787.689361 |
|   |   | 76% <sup>3</sup> H                      | 12935.18 | 773.1 | 12935 | 773.085492 |
|   |   | 77% <sup>3</sup> H                      | 12959.52 | 771.6 | 12960 | 771.633517 |
|   |   | 67% <sup>3</sup> H                      | 13554.84 | 737.7 | 13555 | 737.743861 |
|   |   | 77% <sup>3</sup> H                      | 13706.34 | 729.6 | 13706 | 729.589373 |
|   |   | 78% <sup>3</sup> H                      | 13745.07 | 727.5 | 13745 | 727.533581 |
|   |   | 87% <sup>3</sup> H                      | 13866.6  | 721.2 | 13867 | 721.157313 |
|   |   | 52% <sup>3</sup> F + 34% <sup>1</sup> D | 16789.42 | 595.6 | 16789 | 595.61319  |
|   |   | 35% <sup>3</sup> F + 26% <sup>1</sup> G | 16956.36 | 589.7 | 16956 | 589.749215 |
|   |   | 16% <sup>3</sup> F + 12% <sup>1</sup> G | 17025.02 | 587.4 | 17025 | 587.370822 |
|   |   | 42% <sup>3</sup> F + 34% <sup>1</sup> G | 17034.28 | 587.1 | 17034 | 587.051522 |
| F | 4 | 20% <sup>3</sup> F + 18% <sup>1</sup> G | 17049.74 | 586.5 | 17050 | 586.519208 |
|   |   | 25% <sup>3</sup> F + 20% <sup>1</sup> G | 17144.76 | 583.3 | 17145 | 583.268591 |
|   |   | 20% <sup>3</sup> F + 18% <sup>1</sup> G | 17467.12 | 572.5 | 17467 | 572.504225 |
|   |   | 47% <sup>3</sup> F + 38% <sup>1</sup> G | 17687.33 | 565.4 | 17687 | 565.376459 |
|   |   | 24% <sup>3</sup> F + 27% <sup>1</sup> G | 17831.44 | 560.8 | 17831 | 560.807203 |
| G | 2 | 16% <sup>3</sup> F + 40% <sup>1</sup> D | 17853.45 | 560.1 | 17853 | 560.115832 |
|   |   | 25% <sup>3</sup> F + 23% <sup>1</sup> D | 17870.67 | 559.6 | 17871 | 559.57611  |



|   |   |                                         |          |       |       |            |
|---|---|-----------------------------------------|----------|-------|-------|------------|
|   |   | 43% <sup>3</sup> F + 46% <sup>1</sup> D | 18066.71 | 553.5 | 18067 | 553.504207 |
|   |   | 39% <sup>3</sup> F + 7% <sup>1</sup> D  | 18115.99 | 552.0 | 18116 | 551.998538 |
|   |   | 26% <sup>3</sup> F + 51% <sup>1</sup> D | 18528.3  | 539.7 | 18528 | 539.714923 |
| H | 0 | 78% <sup>3</sup> P + 9% <sup>1</sup> S  | 18588.62 | 538.0 | 18589 | 537.96355  |

**Table S6.** SO-CAS(3,7)SCF/NEVPT2 states for **2**. The assignment was done in terms of J and the composition of each state shows the RS terms with higher contributions. The first band corresponds to the ground manifold (GM) and the first state of this manifold is the SO-GS (highlighted in gray). The other bands (corresponding to the excited manifolds) were labeled with capital letters from A to F. Since Np<sup>4+</sup> is a *f<sup>3</sup>* system, each SO state is doubly-degenerate (Kramers doublets).

| Band | J    | Composition                             | Energy (cm <sup>-1</sup> ) | Energy (nm) |
|------|------|-----------------------------------------|----------------------------|-------------|
|      |      | 76% <sup>4</sup> I + 12% <sup>2</sup> H | 0.00                       | -           |
|      |      | 77% <sup>4</sup> I + 9% <sup>2</sup> H  | 169.59                     | 58965.7     |
| GM   | 9/2  | 77% <sup>4</sup> I + 11% <sup>2</sup> H | 399.84                     | 25010.0     |
|      |      | 72% <sup>4</sup> I + 13% <sup>2</sup> H | 857.01                     | 11668.5     |
|      |      | 72% <sup>4</sup> I + 14% <sup>2</sup> H | 1092.23                    | 9155.6      |
|      |      | 83% <sup>4</sup> I                      | 5739.48                    | 1742.3      |
|      |      | 86% <sup>4</sup> I                      | 5866.96                    | 1704.5      |
| A    | 11/2 | 88% <sup>4</sup> I                      | 6010.55                    | 1663.7      |
|      |      | 83% <sup>4</sup> I                      | 6292.55                    | 1589.2      |
|      |      | 84% <sup>4</sup> I                      | 6459.14                    | 1548.2      |
|      |      | 85% <sup>4</sup> I                      | 6556.55                    | 1525.2      |
| B    | 3/2  | 62% <sup>4</sup> F + 14% <sup>2</sup> D | 9380.85                    | 1066.0      |
|      |      | 61% <sup>4</sup> F + 20% <sup>2</sup> D | 9717.57                    | 1029.1      |
|      |      | 81% <sup>4</sup> I                      | 10597.39                   | 943.6       |
|      |      | 83% <sup>4</sup> I                      | 10626.48                   | 941.0       |
|      |      | 84% <sup>4</sup> I                      | 10890.89                   | 918.2       |
| C    | 13/2 | 79% <sup>4</sup> I                      | 11097.24                   | 901.1       |
|      |      | 81% <sup>4</sup> I                      | 11282.67                   | 886.3       |
|      |      | 85% <sup>4</sup> I                      | 11455.64                   | 872.9       |
|      |      | 85% <sup>4</sup> I                      | 11528.67                   | 867.4       |
|      |      | 24% <sup>2</sup> H + 19% <sup>2</sup> G | 12515.19                   | 799.0       |
|      |      | 20% <sup>2</sup> H + 18% <sup>2</sup> G | 12603.96                   | 793.4       |
| D    | 9/2  | 28% <sup>2</sup> H + 25% <sup>2</sup> G | 12724.76                   | 785.9       |
|      |      | 29% <sup>2</sup> H + 23% <sup>2</sup> G | 12802.25                   | 781.1       |
|      |      | 23% <sup>2</sup> H + 24% <sup>2</sup> G | 13022.11                   | 767.9       |

|   |                                   |                                        |          |            |
|---|-----------------------------------|----------------------------------------|----------|------------|
| E | 5/2                               | 55% <sup>4</sup> F + 9% <sup>4</sup> G | 13179.33 | 758.8      |
|   |                                   | 49% <sup>4</sup> F + 3% <sup>4</sup> G | 13227.60 | 756.0      |
|   |                                   | 43% <sup>4</sup> F + 3% <sup>4</sup> G | 13393.05 | 746.7      |
| F | 5/2, 3/2,<br>7/2,<br>15/2,<br>7/2 | -                                      | 14301.67 | 699.219042 |
|   |                                   | -                                      | 14702.65 | 680.149497 |
|   |                                   | -                                      | 14772.41 | 676.937615 |
|   |                                   | -                                      | 14869.53 | 672.516213 |
|   |                                   | -                                      | 14979.84 | 667.563873 |
|   |                                   | -                                      | 15107.55 | 661.920695 |
|   |                                   | -                                      | 15164.8  | 659.421819 |
|   |                                   | -                                      | 15328.23 | 652.391046 |
|   |                                   | -                                      | 15552.17 | 642.997087 |
|   |                                   | -                                      | 15662.47 | 638.4689   |
|   |                                   | -                                      | 15782.65 | 633.607157 |
|   |                                   | -                                      | 15835.85 | 631.478576 |
|   |                                   | -                                      | 15901.62 | 628.866744 |
|   |                                   | -                                      | 15940.19 | 627.345094 |
|   |                                   | -                                      | 16037.95 | 623.521086 |
| - | 16171.39                          | 618.376033                             |          |            |
| - | 16292.4                           | 613.783114                             |          |            |
| - | 17732.86                          | 563.924827                             |          |            |
| - | 17943.37                          | 557.308911                             |          |            |
| - | 18181.07                          | 550.022633                             |          |            |
| - | 18362.94                          | 544.575106                             |          |            |

**Table S7.** SO-CAS(7,11)SCF/NEVPT2 states for **4**. The assignment was done in terms of J and the composition of each state shows the RS terms with higher contributions. The first band corresponds to the ground manifold (GM) and the first state of this manifold is the SO-GS (highlighted in gray). The other bands (corresponding to the excited manifolds) were labeled with capital letters from A to F. Since Np<sup>4+</sup> is a *f<sup>3</sup>* system, each SO state is doubly-degenerate (Kramers doublets).

| Band | J   | CAS(7,11)SCF/NEVPT2                     |                            |             | CAS(3,7)SCF/NEVPT2         |             |
|------|-----|-----------------------------------------|----------------------------|-------------|----------------------------|-------------|
|      |     | Composition                             | Energy (cm <sup>-1</sup> ) | Energy (nm) | Energy (cm <sup>-1</sup> ) | Energy (nm) |
| GM   | 9/2 | 74% <sup>4</sup> I + 11% <sup>2</sup> H | 0.00                       | -           | 0                          | -           |
|      |     | 74% <sup>4</sup> I + 9% <sup>2</sup> H  | 394.33                     | -           | 366.6                      | 27277.68685 |
|      |     | 74% <sup>4</sup> I + 12% <sup>2</sup> H | 1246.4                     | 8023.10655  | 1188.86                    | 8411.419343 |
|      |     | 72% <sup>4</sup> I + 11% <sup>2</sup> H | 1455.42                    | 6870.86889  | 1386.32                    | 7213.341797 |

|       |                                      |                                         |          |                                         |          |             |          |             |
|-------|--------------------------------------|-----------------------------------------|----------|-----------------------------------------|----------|-------------|----------|-------------|
|       |                                      | 71% <sup>4</sup> I + 14% <sup>2</sup> H | 1693.34  | 5905.48856                              | 1605.15  | 6229.947357 |          |             |
|       |                                      | 85% <sup>4</sup> I                      | 6053.69  | 1651.88505                              | 6037.86  | 1656.215944 |          |             |
|       |                                      | 87% <sup>4</sup> I                      | 6219.37  | 1607.8799                               | 6207.17  | 1611.040136 |          |             |
| A     | 11/2                                 | 84% <sup>4</sup> I                      | 6618.09  | 1511.00997                              | 6581.8   | 1519.341214 |          |             |
|       |                                      | 81% <sup>4</sup> I                      | 6850.71  | 1459.70272                              | 6807.37  | 1468.996103 |          |             |
|       |                                      | 87% <sup>4</sup> I                      | 7056.16  | 1417.20142                              | 6986.13  | 1431.407661 |          |             |
|       |                                      | 84% <sup>4</sup> I                      | 7242.92  | 1380.65863                              | 7133.34  | 1401.867849 |          |             |
|       |                                      | <hr/>                                   |          |                                         |          |             |          |             |
|       |                                      | B                                       | 3/2      | 65% <sup>4</sup> F + 17% <sup>2</sup> D | 9303.34  | 1074.88278  | 9563.01  | 1045.695864 |
|       |                                      |                                         |          | 62% <sup>4</sup> F + 18% <sup>2</sup> D | 10064.49 | 993.592323  | 10232.65 | 977.2639541 |
| <hr/> |                                      |                                         |          |                                         |          |             |          |             |
| C     | 13/2                                 | 81% <sup>4</sup> I                      | 10864.44 | 920.434003                              | 10883.07 | 918.8583736 |          |             |
|       |                                      | 82% <sup>4</sup> I                      | 10933.54 | 914.616858                              | 10955.7  | 912.7668702 |          |             |
|       |                                      | 87% <sup>4</sup> I                      | 11326.23 | 882.906316                              | 11313.46 | 883.9028909 |          |             |
|       |                                      | 75% <sup>4</sup> I                      | 11642.18 | 858.945661                              | 11648.16 | 858.5046909 |          |             |
|       |                                      | 82% <sup>4</sup> I                      | 11893.08 | 840.825085                              | 11857.31 | 843.3616056 |          |             |
|       |                                      | 84% <sup>4</sup> I                      | 12076.68 | 828.042144                              | 12013.03 | 832.4294537 |          |             |
|       |                                      | 84% <sup>4</sup> I                      | 12219.44 | 818.368109                              | 12146.16 | 823.3054727 |          |             |
|       |                                      | <hr/>                                   |          |                                         |          |             |          |             |
| D     | 9/2                                  | 24% <sup>2</sup> H + 20% <sup>2</sup> G | 12804.73 | 780.96141                               | 12905.4  | 774.8694345 |          |             |
|       |                                      | 18% <sup>2</sup> H + 19% <sup>2</sup> G | 13014.48 | 768.374918                              | 13169.56 | 759.3268112 |          |             |
|       |                                      | 24% <sup>2</sup> H + 23% <sup>2</sup> G | 13179.58 | 758.74952                               | 13246.32 | 754.9266513 |          |             |
|       |                                      | 31% <sup>2</sup> H + 25% <sup>2</sup> G | 13225.05 | 756.140809                              | 13402.86 | 746.1094125 |          |             |
|       |                                      | 21% <sup>2</sup> H + 22% <sup>2</sup> G | 13362.7  | 748.351755                              | 13470.77 | 742.3480618 |          |             |
| <hr/> |                                      |                                         |          |                                         |          |             |          |             |
| E     | 5/2                                  | 52% <sup>4</sup> F + 8% <sup>4</sup> G  | 13551.59 | 737.92079                               | 13659.63 | 732.0842512 |          |             |
|       |                                      | 46% <sup>4</sup> F + 2% <sup>4</sup> G  | 13640.65 | 733.102895                              | 13659.63 | 732.0842512 |          |             |
|       |                                      | 41% <sup>4</sup> F + 2% <sup>4</sup> G  | 13829.62 | 723.085667                              | 13723.87 | 728.6574414 |          |             |
| <hr/> |                                      |                                         |          |                                         |          |             |          |             |
| F     | 5/2,<br>3/2,<br>7/2,<br>15/2,<br>7/2 | -                                       | 14626.52 | 683.689627                              | 13925.36 | 718.1142893 |          |             |
|       |                                      | -                                       | 14708.43 | 679.882217                              | 14727.56 | 678.999101  |          |             |
|       |                                      | -                                       | 14800.49 | 675.653306                              | 14840.42 | 673.8353766 |          |             |
|       |                                      | -                                       | 14884.96 | 671.819071                              | 15063    | 663.8783775 |          |             |
|       |                                      | -                                       | 15028.42 | 665.405944                              | 15135.66 | 660.6913739 |          |             |
|       |                                      | -                                       | 15136.88 | 660.638124                              | 15266.48 | 655.0298432 |          |             |
|       |                                      | -                                       | 15378.73 | 650.248753                              | 15380.39 | 650.1785715 |          |             |
|       |                                      | -                                       | 15402.69 | 649.237244                              | 15508.46 | 644.8093492 |          |             |
|       |                                      | -                                       | 15655.78 | 638.74173                               | 15541.08 | 643.4559246 |          |             |
|       |                                      | -                                       | 15807.74 | 632.601498                              | 15782.02 | 633.6324501 |          |             |
|       |                                      | -                                       | 16138.68 | 619.629363                              | 16019.15 | 624.2528474 |          |             |
|       |                                      | -                                       | 16227.72 | 616.229513                              | 16189.04 | 617.7018526 |          |             |
|       |                                      | -                                       | 16370.27 | 610.863474                              | 16369.99 | 610.8739223 |          |             |

|   |          |            |          |             |
|---|----------|------------|----------|-------------|
| - | 16466.44 | 607.295809 | 16464.65 | 607.3618328 |
| - | 16656.44 | 600.368386 | 16511    | 605.6568348 |
| - | 16934.4  | 590.513983 | 16649.76 | 600.609258  |
| - | 17076.35 | 585.605238 | 16897.59 | 591.8003692 |
| - | 17668.18 | 565.989253 | 17073.72 | 585.6954431 |
| - | 17878.92 | 559.317901 | 18053.65 | 553.9046121 |
| - | 18319.55 | 545.864937 | 18329.12 | 545.5799296 |
| - | 18423.06 | 542.797993 | 18651.67 | 536.1450208 |

**Table S8.** TD-DFT assignment of electronic transitions in **1**. Level of theory: ZORA-PBE/TZP. The  $5f \rightarrow 6d$  transitions do not appear as pure contributions to independent peaks, but they are observed in the region between 250-500 nm.

| Wavelength (nm) | Oscillator Strength | Transition        |
|-----------------|---------------------|-------------------|
| 307             | 0.0470              | LMCT (dtbpy)      |
| 322             | 0.0120              | LMCT (dtbpy)      |
| 352             | 0.0119              | LMCT (dtbpy)      |
| 480             | 0.0111              | MLCT (dtbpy)      |
| 751             | 0.0097              | MLCT (dtbpy)      |
| 821             | 0.0253              | MLCT (dtbpy)      |
| 920             | 0.0091              | $f \rightarrow f$ |
| 993             | 0.0003              | $f \rightarrow f$ |
| 1237            | 0.0040              | $f \rightarrow f$ |
| 1422            | 0.0015              | $f \rightarrow f$ |

**Table S9.** TD-DFT assignment of electronic transitions in **2**. Level of theory: ZORA-PBE/TZP. The  $5f \rightarrow 6d$  transitions do not appear as pure contributions to independent peaks, but they are observed in the region between 250-500 nm.

| Wavelength (nm) | Oscillator Strength | Transition                  |
|-----------------|---------------------|-----------------------------|
| 352             | 0.0102              | $n \rightarrow \pi^*$ (ONO) |
| 390             | 0.0032              | LMCT (Cl)                   |
| 404             | 0.0036              | LMCT (dtbpy)                |
| 571             | 0.0029              | MLCT (dtbpy)                |
| 580             | 0.0098              | MLCT (dtbpy)                |

|      |        |                   |
|------|--------|-------------------|
| 663  | 0.0062 | MLCT (dtbpy)      |
| 963  | 0.0021 | $f \rightarrow f$ |
| 1052 | 0.0041 | $f \rightarrow f$ |
| 1310 | 0.0040 | $f \rightarrow f$ |

**Table S10.** TD-DFT assignment of electronic transitions in **3**. Level of theory: ZORA-PBE/TZP. The  $5f \rightarrow 6d$  transitions do not appear as pure contributions to independent peaks, but they are observed in the region between 250-500 nm.

| Wavelength (nm) | Oscillator Strength | Transition                  |
|-----------------|---------------------|-----------------------------|
| 334             | 0.0169              | LMCT (ind)                  |
| 357             | 0.0145              | $n \rightarrow \pi^*$ (ONO) |
| 378             | 0.0115              | LMCT (ONO)                  |
| 387             | 0.0107              | LMCT (ONO)                  |
| 453             | 0.0026              | LMCT (ONO)                  |
| 587             | 0.0049              | LMCT (ONO)                  |
| 822             | 0.0001              | MLCT (ONO)                  |
| 911             | 0.0001              | $f \rightarrow f$           |

**Table S11.** TD-DFT assignment of electronic transitions in **4**. Level of theory: ZORA-PBE/TZP. The  $5f \rightarrow 6d$  transitions do not appear as pure contributions to independent peaks, but they are observed in the region between 250-500 nm.

| Wavelength (nm) | Oscillator Strength | Transition                    |
|-----------------|---------------------|-------------------------------|
| 331             | 0.0313              | $\pi \rightarrow \pi^*$ (ONO) |
| 332             | 0.0118              | LMCT (ind)                    |
| 340             | 0.0073              | LMCT (ONO)                    |
| 359             | 0.0173              | $n \rightarrow \pi^*$ (ONO)   |
| 426             | 0.0101              | MLCT (ind)                    |
| 469             | 0.0063              | MLCT (ind)                    |
| 572             | 0.0091              | MLCT (ONO)                    |
| 763             | 0.0097              | LMCT (ONO)                    |
| 1187            | 0.0006              | $f \rightarrow f$             |
| 1382            | 0.0006              | $f \rightarrow f$             |

**Table S12.** NLMO decomposition for **1** at ZORA-PBE/TZP level of theory. NLMO/NPA bond orders are also detailed. In case of the chlorine atoms, the three most important NLMOs are described. The natural spin density is 1.84.

| NLMO | Type                | Composition                                            | BO /NLMO | BO   |
|------|---------------------|--------------------------------------------------------|----------|------|
| 1a   | U 5f                | 97% U [100% f]                                         | -        | -    |
| 1b   | U 5f                | 75% U [100% f] + 15% lig(bpy)                          | -        | -    |
| 2a   | U-Cl1               | 92% Cl [100% p] + 8% U [40% d + 60% f]                 | 0.080    |      |
| 2b   | U-Cl1               | 90% Cl [100% p] + 10% U [44% d + 56% f]                | 0.095    | 0.31 |
| 2c   | U-Cl1               | 85% Cl [42% s + 58% p] + 14% U [23% s + 38% d + 39% f] | 0.138    |      |
| 3a   | U-Cl2               | 90% Cl [100% p] + 10% U [45% d + 55% f]                | 0.095    |      |
| 3b   | U-Cl2               | 90% Cl [100% p] + 10% U [48% d + 52% f]                | 0.092    | 0.33 |
| 3c   | U-Cl2               | 85% Cl [42% s + 58% p] + 14% U [16% s + 33% d + 51% f] | 0.134    |      |
| 4a   | U-O1                | 94% O [55% s + 45% p] + 5% U [16% s + 49% d + 35% f]   | 0.051    |      |
| 4b   | U-O1                | 88% O [13% s + 87% p] + 9% U [26% d + 71% f]           | 0.091    | 0.23 |
| 4c   | U-O1                | 87% O [100% p] + 9% U [27% d + 72% f]                  | 0.092    |      |
| 5a   | U-O2                | 94% O [54% s + 46% p] + 5% U [15% s + 51% d + 34% f]   | 0.046    |      |
| 5b   | U-O2                | 88% O [14% s + 86% p] + 9% U [24% d + 71% f]           | 0.089    | 0.22 |
| 5c   | U-O2                | 87% O [100% p] + 9% U [29% d + 71% f]                  | 0.093    |      |
| 6a   | U-N1                | 88% N [25% s + 75% p] + 9% U [13% s + 32% d + 55% f]   | 0.086    | 0.12 |
| 7a   | U-N2 <sub>bpy</sub> | 89% N [27% s + 73% p] + 8% U [18% s + 35% d + 47% f]   | 0.081    | 0.12 |
| 7b   | U-N3 <sub>bpy</sub> | 89% N [27% s + 73% p] + 8% U [18% s + 35% d + 47% f]   | 0.080    | 0.12 |

**Table S13.** NLMO decomposition for **2** at ZORA-PBE/TZP level of theory. NLMO/NPA bond orders are also detailed. In case of the chlorine atoms, the three most important NLMOs are described. The natural spin density is 3.01.

| NLMO | Type                            | Composition                                             | BO /NLMO | BO   |
|------|---------------------------------|---------------------------------------------------------|----------|------|
| 1a   | Np                              | 99% Np [100% f]                                         | -        | -    |
| 1b   | Np                              | 99% Np [100% f]                                         | -        | -    |
| 1c   | Np                              | 96% Np [100% f]                                         | -        | -    |
| 2a   | Np-Cl1                          | 93% Cl [100% p] + 7% Np [73% d + 27% f]                 | 0.068    |      |
| 2b   | Np-Cl1                          | 92% Cl [99% p] + 8% Np [54% d + 44% f]                  | 0.074    | 0.28 |
| 2c   | Np-Cl1                          | 85% Cl [37% s + 63% p] + 14% Np [17% s + 30% d + 53% f] | 0.138    |      |
| 3a   | Np-Cl2                          | 94% Cl [100% p] + 6% Np [60% d + 40% f]                 | 0.057    |      |
| 3b   | Np-Cl2                          | 90% Cl [99% p] + 10% Np [43% d + 57% f]                 | 0.098    | 0.28 |
| 3c   | Np-Cl2                          | 87% Cl [38% s + 62% p] + 13% Np [24% s + 44% d + 32% f] | 0.122    |      |
| 4a   | Np-O1                           | 95% O [60% s + 40% p] + 4% Np [21% s + 61% d + 17% f]   | 0.039    |      |
| 4b   | Np-O1                           | 88% O [100% p] + 7% Np [38% d + 62% f]                  | 0.072    | 0.23 |
| 4c   | Np-O1                           | 85% O [8% s + 92% p] + 12% Np [14% d + 83% f]           | 0.121    |      |
| 5a   | Np-O2                           | 95% O [60% s + 40% p] + 4% Np [22% s + 62% d + 16% f]   | 0.040    |      |
| 5b   | Np-O2                           | 88% O [100% p] + 8% Np [32% d + 67% f]                  | 0.078    | 0.23 |
| 5c   | Np-O1                           | 85% O [8% s + 92% p] + 12% Np [14% d + 83% f]           | 0.117    |      |
| 6a   | Np-N1                           | 88% N [25% s + 75% p] + 9% Np [14% s + 31% d + 55% f]   | 0.090    | 0.12 |
| 7a   | Np-N2 <sub>(bpy)</sub>          | 89% N [27% s + 73% p] + 8% Np [18% s + 36% d + 46% f]   | 0.075    | 0.09 |
| 7b   | $\sigma$ Np-N3 <sub>(bpy)</sub> | 89% N [27% s + 73% p] + 8% Np [14% s + 36% d + 49% f]   | 0.078    | 0.09 |

**Table S14.** NLMO decomposition for **3** at ZORA-PBE/TZP level of theory. NLMO/NPA bond orders are also detailed. In case of the chlorine atoms, the three most important NLMOs described. The natural spin density is 2.01.

| NLMO | Type  | Composition                                            | BO /NLMO | BO   |
|------|-------|--------------------------------------------------------|----------|------|
| 1a   | U 5f  | 97% Np [100% f]                                        | -        | -    |
| 1b   | U 5f  | 95% Np [100% f]                                        | -        | -    |
| 1c   |       |                                                        |          |      |
| 2a   | U-Cl1 | 91% Cl [100% p] + 9% U [50% d + 50% f]                 | 0.086    |      |
| 2b   | U-Cl1 | 91% Cl [100% p] + 9% U [50% d + 50% f]                 | 0.088    | 0.30 |
| 2c   | U-Cl1 | 88% Cl [52% s + 48% p] + 12% U [24% s + 43% d + 33% f] | 0.122    |      |
| 3a   | U-O1  | 93% O [60% s + 40% p] + 6% U [16% s + 40% d + 44% f]   | 0.056    |      |
| 3b   | U-O1  | 90% O [9% s + 91% p] + 7% U [2% s + 36% d + 61% f]     | 0.073    | 0.22 |
| 3c   | U-O1  | 87% O [100% p] + 9% U [29% d + 71% f]                  | 0.089    |      |
| 4a   | U-O2  | 93% O [60% s + 40% p] + 6% U [15% s + 38% d + 47% f]   | 0.056    |      |
| 4b   | U-O2  | 89% O [9% s + 91% p] + 8% U [2% s + 30% d + 67% f]     | 0.078    | 0.21 |
| 4c   | U-O2  | 87% O [100% p] + 9% U [32% d + 68% f]                  | 0.090    |      |
| 5a   | U-N   | 89% N [25% s + 75% p] + 9% U [18% s + 28% d + 54% f]   | 0.077    | 0.12 |
| 6a   | U-Ind | 91% lig + 9% U [2% s + 28% d + 70% f]                  | -        | -    |
| 6b   | U-Ind | 91% lig + 9% U [4% s + 23% d + 73% f]                  | -        | -    |
| 6c   | U-Ind | 93% lig + 7% U [8% s + 28% d + 64% f]                  | -        | -    |

**Table S15.** NLMO decomposition for **4** at ZORA-PBE/TZP level of theory. NLMO/NPA bond orders are also detailed. In case of the chlorine atoms, the three most important NLMOs described. The natural spin density is 3.14.

| NLMO | Type   | Composition                                             | BO /NLMO | BO   |
|------|--------|---------------------------------------------------------|----------|------|
| 1a   | Np 5f  | 99% Np [100% f]                                         | -        | -    |
| 1b   | Np 5f  | 99% Np [100% f]                                         | -        | -    |
| 1c   | Np 5f  | 98% Np [100% f]                                         | -        | -    |
| 2a   | Np-Cl1 | 91% Cl [100% p] + 9% Np [45% d + 55% f]                 | 0.088    |      |
| 2b   | Np-Cl1 | 90% Cl [36% s + 64% p] + 10% Np [27% s + 50% d + 22% f] | 0.095    | 0.29 |
| 2c   | Np-Cl1 | 89% Cl [19% s + 81% p] + 10% Np [11% s + 49% d + 40% f] | 0.100    |      |
| 3a   | Np-O1  | 95% O [50% s + 50% p] + 4% Np [15% s + 56% d + 29% f]   | 0.041    |      |
| 3b   | Np-O1  | 89% O [14% s + 86% p] + 7% Np [5% s + 42% d + 52% f]    | 0.066    | 0.19 |
| 3c   | Np-O1  | 87% O [5% s + 95% p] + 10% Np [23% d + 75% f]           | 0.096    |      |
| 4a   | Np-O2  | 95% O [50% s + 50% p] + 4% Np [16% s + 57% d + 27% f]   | 0.041    |      |
| 4b   | Np-O2  | 89% O [14% s + 86% p] + 7% Np [4% s + 43% d + 53% f]    | 0.068    | 0.19 |
| 4c   | Np-O2  | 87% O [5% s + 95% p] + 10% Np [26% d + 73% f]           | 0.098    |      |
| 5a   | Np-N   | 88% N [25% s + 75% p] + 9% Np [18% s + 23% d + 59% f]   | 0.090    | 0.12 |
| 6a   | Np-Ind | 90% lig + 10% Np [3% s + 24% d + 73% f]                 | -        | -    |
| 6b   | Np-Ind | 91% lig + 9% Np [5% s + 21% d + 74% f]                  | -        | -    |
| 6c   | Np-Ind | 84% lig + 16% Np [15% d + 83% f]                        | -        | -    |

### 2.1.1 Raw Data For Figure 3

Energy and orbital compositions were obtained from fragment calculations performed at ZORA-B3LYP/TZP level of theory in AMS.2022.101. The orbital composition was normalized in terms of the most contributing fragments.

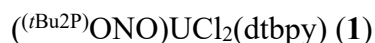

| Energy | Composition                                     |
|--------|-------------------------------------------------|
| -0.941 | 94% dtbpy + 6% U ( <i>d</i> )                   |
| -1.715 | 100% ONO                                        |
| -1.894 | 100% ONO                                        |
| -2.017 | 91% dtbpy + 9% U( <i>f</i> )                    |
| -2.198 | 90% dtbpy + 4% U( <i>f</i> ) + 6% U( <i>d</i> ) |
| -2.554 | 23% ONO + 77% U( <i>f</i> )                     |
| -2.639 | 7% ONO + 93% U( <i>f</i> )                      |
| -2.732 | 17% dtbpy + 83% U( <i>f</i> )                   |
| -2.836 | 15% dtbpy + 85% U( <i>f</i> )                   |
| -3.066 | 3% ONO + 97% U( <i>f</i> )                      |
| -3.238 | 52% dtbpy + 2% ONO + 46% U( <i>f</i> )          |
| -3.415 | 3% dtbpy + 97% U( <i>f</i> )                    |
| -3.572 | 15% dtbpy + 85% U( <i>f</i> )                   |
| -5.179 | 95% ONO + 5% U( <i>d</i> )                      |
| -5.237 | 90% ONO + 3% U( <i>d</i> ) + 7% U( <i>f</i> )   |
| -5.857 | 94% dtbpy + 6% U( <i>d</i> )                    |
| -6.289 | 95% ONO + 5% U( <i>d</i> )                      |
| -6.385 | 96% Cl + 4% U( <i>f</i> )                       |
| -6.491 | 95% Cl + 5% U( <i>f</i> )                       |
| -6.585 | 90% ONO + 6% U( <i>d</i> ) + 4% U( <i>f</i> )   |
| -6.771 | 91% Cl + 4%U( <i>d</i> ) + 5% U( <i>f</i> )     |
| -6.837 | 94% dtbpy + 6% U( <i>d</i> )                    |
| -6.879 | 97% dtbpy + 3% U( <i>d</i> )                    |
| -6.923 | 100% ONO                                        |
| -6.993 | 100% Cl                                         |



$(t\text{Bu}_2\text{P})\text{ONO})\text{NpCl}_2(\text{dtbpy})$  (2)

| Energy  | Composition                                      |
|---------|--------------------------------------------------|
| -0.7001 | 100% dtbpy                                       |
| -1.0162 | 100% dtbpy                                       |
| -1.2967 | 100% dtbpy                                       |
| -1.6739 | 100% ONO                                         |
| -2.0478 | 93% ONO + 3% Np( <i>d</i> ) + 4% Np( <i>f</i> )  |
| -2.2458 | 100% dtbpy                                       |
| -2.5512 | 100% dtbpy                                       |
| -2.8361 | 69% dtbpy + 5% Np( <i>d</i> ) 26% Np( <i>f</i> ) |
| -3.1729 | 8% ONO + 92% Np( <i>f</i> )                      |
| -3.2952 | 12% dtbpy + 88% Np( <i>f</i> )                   |
| -3.3444 | 5% dtbpy + 5% ONO + 90% Np( <i>f</i> )           |
| -3.5025 | 28% dtbpy + 72% Np( <i>f</i> )                   |
| -3.919  | 5% ONO + 4% Np( <i>d</i> ) + 91% Np( <i>f</i> )  |
| -4.1088 | 5% ONO + 3% Np( <i>d</i> ) + 92% Np( <i>f</i> )  |
| -4.1368 | 2% dtbpy + 98% Np( <i>f</i> )                    |
| -5.0631 | 92% ONO + 3% Np( <i>d</i> ) + 5% Np( <i>f</i> )  |
| -5.0999 | 90% ONO + 4% Np( <i>d</i> ) + 6% Np( <i>f</i> )  |
| -5.7141 | 95% dtbpy + 5% Np( <i>f</i> )                    |
| -6.0157 | 95% ONO + 5% Np( <i>f</i> )                      |
| -6.2492 | 92% Cl                                           |
| -6.2984 | 97% Cl + 3% Np( <i>f</i> )                       |
| -6.3519 | 96% Cl + 4% Np( <i>f</i> )                       |
| -6.3716 | 100% ONO                                         |
| -6.4302 | 91% ONO + 3% Np( <i>d</i> ) + 6% Np( <i>f</i> )  |
| -6.5227 | 87% Cl + 4% Np( <i>d</i> ) + 9% Np( <i>f</i> )   |
| -6.563  | 87% Cl + 3% Np( <i>d</i> ) + 10% Np( <i>f</i> )  |
| -6.7678 | 100% dtbpy                                       |
| -6.8292 | 100% Cl                                          |
| -6.8346 | 100% ONO                                         |

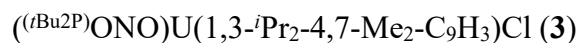

| Energy  | Composition                                    |
|---------|------------------------------------------------|
| -0.7633 | 100% Ind                                       |
| -0.9022 | 80 % Ind + 20% U( <i>d</i> )                   |
| -1.6215 | 86% Ind + 7% U( <i>d</i> ) + 7% U( <i>f</i> )  |
| -2.1076 | 100% ONO                                       |
| -2.1932 | 89% ONO + 11% U( <i>f</i> )                    |
| -2.7072 | 3% ONO + 9% Ind + 88% U( <i>f</i> )            |
| -2.8011 | 5% ONO + 8% Ind + 87% U( <i>f</i> )            |
| -3.0902 | 8% ONO + 92% U( <i>f</i> )                     |
| -3.3304 | 5% ONO + 95% U( <i>f</i> )                     |
| -3.3777 | 7% ONO + 93% U( <i>f</i> )                     |
| -3.7354 | 5% Ind + 95% U( <i>f</i> )                     |
| -3.7805 | 4% Ind + 96% U( <i>f</i> )                     |
| -4.8331 | 86% Ind + 3% U( <i>d</i> ) + 11% U( <i>f</i> ) |
| -5.4122 | 90% ONO + 4% U( <i>d</i> ) + 6% U( <i>f</i> )  |
| -5.4489 | 88% ONO + 5% U( <i>d</i> ) + 7% U( <i>f</i> )  |
| -5.888  | 92% Ind + 8% U( <i>f</i> )                     |
| -6.1804 | 95% ONO + 5% U( <i>f</i> )                     |
| -6.5173 | 95% Ind + 5% U( <i>f</i> )                     |
| -6.7992 | 95% ONO + 5% U( <i>f</i> )                     |
| -6.816  | 95% Cl + 5% U( <i>f</i> )                      |
| -6.884  | 94% Cl + 6% U( <i>f</i> )                      |
| -6.9863 | 100% Cl                                        |

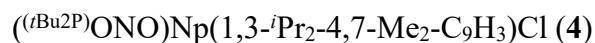

| Energy  | Composition                                      |
|---------|--------------------------------------------------|
| -0.7908 | 100% Ind                                         |
| -0.9447 | 85% Ind + 15% Np( <i>d</i> )                     |
| -1.7222 | 92% Ind + 8% Np( <i>d</i> )                      |
| -2.1171 | 100% ONO                                         |
| -2.5054 | 91% ONO + 4% Np( <i>d</i> ) + 5% Np( <i>f</i> )  |
| -3.3511 | 4% ONO + 4% Ind + 92% Np( <i>f</i> )             |
| -3.4845 | 21% Ind + 79% Np( <i>f</i> )                     |
| -3.581  | 5% Ind + 6% ONO + 89% Np( <i>f</i> )             |
| -3.7481 | 3% ONO + 6% Ind + 91% Np( <i>f</i> )             |
| -4.2943 | 4% Ind + 96% Np( <i>f</i> )                      |
| -4.3607 | 6% Ind + 94% Np( <i>f</i> )                      |
| -4.5304 | 100% Np( <i>f</i> )                              |
| -4.9614 | 77% Ind + 4% Np( <i>d</i> ) + 19% Np( <i>f</i> ) |
| -5.3778 | 94% ONO + 3% Np( <i>d</i> ) + 3% Np( <i>f</i> )  |
| -5.3924 | 94% ONO + 3% Np( <i>d</i> ) + 3% Np( <i>f</i> )  |
| -5.9745 | 96% Ind + 4% Np( <i>f</i> )                      |
| -6.1132 | 94% ONO + 6% Np( <i>f</i> )                      |
| -6.4632 | 95% ONO + 5% Np( <i>f</i> )                      |
| -6.5407 | 96% Ind + 4% Np( <i>f</i> )                      |
| -6.7302 | 94% ONO + 6% Np( <i>f</i> )                      |
| -6.7868 | 95% Cl + 5% Ind                                  |
| -6.9124 | 92% Cl + 5% Ind + 3% Np( <i>f</i> )              |
| -6.9373 | 95% Cl + 5% Np( <i>d</i> )                       |

**Table S16.** Optimized Cartesian Coordinates for **1** and **2**. Level of theory: ZORA-B3LYP/TZP.

| <b>1</b> |                   |                   |                   | <b>2</b> |                   |                   |                  |
|----------|-------------------|-------------------|-------------------|----------|-------------------|-------------------|------------------|
| U        | 16.85505620382039 | 11.74836444154461 | 7.97486837104347  | Np       | 10.22742892327810 | 12.32022812902987 | 6.83200726762001 |
| P        | 14.73705188310940 | 12.64954589004166 | 12.30529069637341 | Cl       | 10.67699841000155 | 14.89696214385044 | 6.62695262784232 |
| Cl       | 16.35778932758612 | 9.16676416670276  | 8.20635126015179  | P        | 12.32962177029744 | 11.41099401013955 | 2.50447607780474 |
| P        | 12.99159638510317 | 12.30884058335773 | 5.02177926325197  | Cl       | 9.02215044006880  | 10.01288659127084 | 7.18046744252701 |
| C        | 13.53435228927713 | 10.67898960388795 | 10.83427178011905 | P        | 14.09038201866010 | 11.77319470500027 | 9.77122794898185 |
| H        | 12.73416428102317 | 11.42512783704878 | 10.75242355719354 | O        | 10.62576773709543 | 11.88812692103474 | 4.74864148374990 |
| H        | 13.07185282439651 | 9.68457658476536  | 10.78423030732484 | O        | 11.52410044984937 | 12.03489707831929 | 8.53875633809815 |
| H        | 14.20013401416581 | 10.77349522100068 | 9.97315041214326  | N        | 12.25224120386688 | 10.92412774488409 | 6.40618969011418 |
| O        | 15.53845600171717 | 11.98409149139683 | 6.26283055095427  | N        | 8.42317048132561  | 13.02990789785862 | 8.58957115793821 |
| C        | 14.49367734735688 | 12.88070985504571 | 6.04219050896542  | N        | 7.85560523119115  | 13.01360044655002 | 5.96816528723733 |
| H        | 14.85496185658923 | 13.73187087442163 | 5.43468971365542  | C        | 12.47869347427117 | 10.46446189652574 | 5.16779049289799 |
| C        | 12.71839542692053 | 10.50197560946320 | 5.51900717056153  | C        | 5.58300694146285  | 13.67251358573995 | 6.29940124355881 |
| C        | 12.63093351034399 | 10.51106191017900 | 7.05391246619254  | H        | 4.79013336235679  | 13.92878569405643 | 6.99080392611468 |
| H        | 13.61019067516804 | 10.67366463259373 | 7.51053473443124  | C        | 14.09202802781767 | 9.68144509190881  | 7.26087554025283 |
| H        | 12.26542898421883 | 9.53521942539784  | 7.39942135753274  | H        | 14.72069951573214 | 9.41145736703044  | 8.10405602633620 |
| H        | 11.93486379541670 | 11.27762654385589 | 7.41711700845601  | C        | 6.84776921603195  | 13.33469898237485 | 6.79415781800708 |
| C        | 13.77347198624398 | 9.48055031119125  | 5.08155975516870  | C        | 14.32781573133794 | 9.18157995502963  | 5.98164382049303 |
| H        | 13.81402011495341 | 9.37467065984040  | 3.99223183500355  | H        | 15.15082457214238 | 8.48982568505267  | 5.81337623240140 |
| H        | 13.51407220927337 | 8.49606088955970  | 5.49498141900706  | C        | 13.52287368174829 | 9.57527363631885  | 4.91436749958643 |
| H        | 14.76518973751878 | 9.74604148966615  | 5.45541450975423  | H        | 13.70252006128935 | 9.22267461441884  | 3.90320026097190 |
| C        | 13.69593835974682 | 12.43305972020185 | 3.26092774604823  | C        | 11.47435033626267 | 10.96315970347973 | 4.14519537352265 |

|   |                    |                   |                   |   |                   |                    |                   |
|---|--------------------|-------------------|-------------------|---|-------------------|--------------------|-------------------|
| C | 12.77214094395596  | 11.67997334465359 | 2.29341747422232  | H | 10.89386891979547 | 10.06883547368106  | 3.84888816402882  |
| H | 12.85323730205688  | 10.59473182937194 | 2.40622054329838  | C | 7.15687291167639  | 13.31970944346528  | 8.25183274999370  |
| H | 13.05140238810342  | 11.92679899881106 | 1.25991482055797  | C | 6.51668949497387  | 13.57981425849647  | 10.58333755023810 |
| H | 11.72258709287984  | 11.96465776168281 | 2.43278313821148  | C | 13.02953176546558 | 10.56754830250566  | 7.43799145961330  |
| C | 14.05870379849512  | 13.49072848694265 | 7.36396039744282  | C | 12.59357372258695 | 11.17051892491946  | 8.76008747890470  |
| C | 13.00762953476349  | 14.39089743917619 | 7.53744358342859  | H | 12.25477611636389 | 10.31360020691201  | 9.37284086537282  |
| H | 12.38529609450929  | 14.66962990714407 | 6.69246880974234  | C | 14.32241044551400 | 13.58763319874225  | 9.28126207569821  |
| C | 12.77455119709611  | 14.89447008387711 | 8.81615375625550  | C | 8.75505967542310  | 13.01892244765793  | 9.88425713559684  |
| H | 11.95880508365370  | 15.59543900318097 | 8.98132981097977  | H | 9.79389283256061  | 12.77962692154921  | 10.10169443885854 |
| C | 13.57126842340534  | 14.49304872342091 | 9.88701026629482  | C | 6.19007297354918  | 13.594001874403581 | 9.22581851675788  |
| H | 13.39296744786663  | 14.85105068432640 | 10.89646650554934 | H | 5.17447682362207  | 13.81530729377359  | 8.92235622660238  |
| C | 14.60474245685840  | 13.58979519189483 | 9.63897411547311  | C | 9.51960510298355  | 11.60393874888844  | 1.70510591095617  |
| N | 14.82604553694323  | 13.12600964065782 | 8.40082888540597  | H | 9.19571892888895  | 11.11125102066409  | 2.62716994616353  |
| C | 15.60362861772717  | 13.08314320943134 | 10.66616923214169 | H | 8.78983964344059  | 11.35925198252818  | 0.91936969253133  |
| H | 16.19060860875831  | 13.97320563087617 | 10.96183978259366 | H | 9.49148248944501  | 12.68499964884126  | 1.86674678256294  |
| C | 16.15503689344134  | 12.92134236067842 | 13.54097219420479 | C | 5.49649733183227  | 13.86106085312972  | 11.68812745531642 |
| C | 17.54315494113647  | 12.43351689641499 | 13.11241502672670 | C | 5.33182375491831  | 13.68659229602012  | 4.92593257902223  |
| H | 17.56266913093494  | 11.35404758038778 | 12.93967408341927 | C | 12.74221056730429 | 13.25353537701574  | 2.65444086125430  |
| H | 18.27110812897198  | 12.66483438917535 | 13.90383299233687 | C | 7.63394930235279  | 13.02579359638072  | 4.65033433077768  |
| H | 17.87551658082268  | 12.93218360188429 | 12.19671679995953 | H | 8.48447702177975  | 12.75584275122338  | 4.02837515563073  |
| C | 15.777434683930817 | 12.2719822997889  | 14.8872386956349  | C | 10.91022423944012 | 11.12558279340173  | 1.27374841142879  |
| H | 14.77277887813559  | 12.58455308102443 | 15.20768372088843 | C | 14.39860279436737 | 13.58737296021959  | 7.74583051906117  |
| H | 16.48730664264773  | 12.62195744930926 | 15.65682900909727 | H | 15.10769885174834 | 12.83719673308306  | 7.37360523989100  |
| H | 15.82057694399485  | 11.19428489714154 | 14.85386480186024 | H | 14.73978858097548 | 14.57246381682597  | 7.40169324381963  |
| C | 14.30381665277795  | 10.81128319119198 | 12.15904601696871 | H | 13.41970017440168 | 13.40637755407877  | 7.29566541564250  |
| C | 15.46198567881349  | 9.80807914764243  | 12.16909143827327 | C | 6.40607363402271  | 13.35125182397794  | 4.09237386744598  |
| H | 16.17275960597811  | 10.01193963583682 | 11.36482732684539 | H | 6.30328320610659  | 13.33795522543714  | 3.01093705329313  |
| H | 15.06307431237279  | 8.79634242085057  | 12.01190076949274 | C | 3.96866703956514  | 14.04658134768236  | 4.33226057803365  |
| H | 15.99162491227345  | 9.80242254574418  | 13.12774055154480 | C | 13.50914458235367 | 13.39052360505286  | 3.98013870104463  |
| O | 16.44521515584484  | 12.14082602577313 | 10.07672851418348 | H | 12.84329214368251 | 13.28751559969797  | 4.84024464790152  |
| N | 18.69718460489107  | 11.04270156632015 | 6.21507665731612  | H | 13.96200394384938 | 14.38919974194063  | 4.03320085735870  |
| C | 19.96533460083746  | 10.75921898967690 | 6.55006287112140  | H | 14.31614716725160 | 12.65170891282181  | 4.06172475301722  |
| C | 20.27593015490927  | 10.75773019152258 | 8.007334358383249 | H | 11.57312945707179 | 14.24408079157301  | 2.64691201957011  |
| N | 19.26742186748022  | 11.08909829809460 | 8.82811290695877  | H | 11.04380024736132 | 14.24695577528702  | 1.68808664428108  |
| C | 19.48800841057870  | 11.08775679626528 | 10.14644537429260 | H | 11.96063704911401 | 15.25966100720941  | 2.80771471571344  |
| H | 18.63718347621853  | 11.36311607438206 | 10.76625762984493 | H | 10.86409237856955 | 14.03032653953037  | 3.45030617228403  |
| C | 20.71457548460355  | 10.76480808491964 | 10.70904799056109 | C | 11.27790931363285 | 11.75953434245295  | -0.07517603430705 |
| H | 20.81610345630784  | 10.78756764485001 | 11.79042980113550 | H | 11.22999817348856 | 12.85224283589498  | -0.04406865489856 |
| C | 21.78892773260038  | 10.41868474193893 | 9.87999458019256  | H | 10.56875571850944 | 11.41808643092248  | -0.84166808101238 |
| C | 23.14955816310867  | 10.05828572679063 | 10.47909355704803 | H | 12.28453034375180 | 11.46862294833200  | -0.39831862703244 |
| C | 24.18749184019903  | 9.72323983876850  | 9.40161974691062  | C | 14.31845001521019 | 12.39112331692982  | 12.50139550247673 |
| H | 23.88625984365666  | 8.86703029113043  | 8.80124785716271  | H | 15.37175428673201 | 12.12472564102915  | 12.3540271601161  |
| H | 25.14115119041780  | 9.47566646945063  | 8.97890663794647  | H | 14.05008424221839 | 12.13480320425158  | 13.53551058398624 |
| H | 24.36564264417258  | 10.57086786035234 | 8.72969545728447  | H | 14.21841589289389 | 13.47536818020168  | 12.39429727416128 |
| C | 22.98119763049967  | 8.83281838890941  | 11.39749313032143 | C | 13.72058152283256 | 13.59462782458899  | 1.51598794285699  |
| H | 22.27504240897810  | 9.02797290809932  | 12.21076173663461 | H | 14.58672283085272 | 12.92314100182127  | 1.52209178645570  |
| H | 23.94561485988035  | 8.56816873575214  | 11.84603095752831 | H | 14.08473793865559 | 12.62199055188351  | 1.65250393882982  |
| H | 22.61622341093342  | 7.96673657702193  | 10.83451642188035 | H | 13.25484279047766 | 13.53731072010806  | 0.52773141390559  |
| C | 21.53960042971974  | 10.42157604303306 | 8.50600643260354  | C | 3.45561683546375  | 12.85457345258978  | 3.50184606264945  |
| H | 22.33212420717594  | 10.15597449764871 | 7.81761260840144  | H | 4.13723163706894  | 12.60682649671618  | 2.68189204056721  |
| C | 20.93069188607533  | 10.47952958568861 | 5.57623120766683  | H | 2.48008645516751  | 13.09780131293990  | 3.06567753951034  |
| H | 21.94781245391299  | 10.26417510269323 | 5.87910189111053  | H | 3.33911308122903  | 11.96166637214199  | 4.12597929048919  |
| C | 20.60002182528573  | 10.48116192932980 | 4.21951527990037  | C | 5.97277519507704  | 15.06981899510474  | 12.51586729800024 |
| C | 21.61743172145114  | 10.19322412565121 | 3.11394149831195  | H | 6.94833476346643  | 14.88807428499534  | 12.97784955028132 |
| C | 18.36199045518885  | 11.04063814603963 | 4.92114654181913  | H | 5.25507564653822  | 15.27664109373618  | 13.31788517566697 |
| H | 17.32097318185242  | 11.27140422107391 | 4.70336709493599  | H | 6.05631321531315  | 15.96614798732337  | 11.89132999393539 |
| C | 19.26609243692554  | 10.76878176808880 | 3.90410372360075  | C | 5.39421392410921  | 12.62073905778998  | 12.59639168335505 |
| H | 18.91791307434709  | 10.78980555167844 | 2.87521758303701  | H | 5.06255236933879  | 11.74420066353506  | 12.02901836677145 |
| C | 16.21058116652335  | 14.44673136488880 | 13.74387305187574 | H | 4.66942896886879  | 12.80470297407800  | 13.39762431323143 |
| H | 16.46193158452047  | 14.98135696550616 | 12.82017911142316 | H | 6.35480373876022  | 12.37723750640858  | 13.0962632027052  |
| H | 16.98622884855496  | 14.69036194421093 | 14.48261176462286 | C | 4.13105302041008  | 15.27869942945119  | 3.42177144747117  |
| H | 15.25336408720946  | 14.83452958779816 | 14.10895228950347 | H | 4.49469564612424  | 16.14214346488573  | 3.98968383356967  |
| C | 23.01187695748180  | 9.88887808764991  | 3.67393216336391  | H | 3.16473224695202  | 15.54329980336637  | 2.97728553222013  |
| H | 23.41482455012644  | 10.73350507521088 | 4.24468007213233  | H | 4.83585961153674  | 15.09116473136819  | 2.60550676217464  |
| H | 23.70129729729570  | 9.69321321774782  | 2.84588956429368  | C | 13.24934370118875 | 14.58451655373853  | 9.73135717538076  |
| H | 23.00799925533248  | 9.00093705956724  | 4.31666427781458  | H | 12.26010545554357 | 14.29946877330247  | 9.36527603014591  |
| C | 23.66487072720248  | 11.25394661553556 | 11.30276909475200 | H | 13.48296758906873 | 15.57577367487062  | 9.31883776004753  |
| H | 23.78653953032745  | 12.14205665892993 | 10.67284297938308 | H | 13.21623057332079 | 14.68577528201746  | 10.82142148351945 |
| H | 24.63822869614118  | 11.00999929901859 | 11.74329505216010 | C | 4.10401625539830  | 14.17151652521372  | 11.12657949046240 |
| H | 22.98197742819912  | 11.50986021387843 | 12.11911238517417 | H | 4.11071493753462  | 15.06406455876368  | 10.49026221477154 |

|    |                   |                    |                   |   |                   |                   |                   |
|----|-------------------|--------------------|-------------------|---|-------------------|-------------------|-------------------|
| C  | 21.14072358193616 | 8.97743733600223   | 2.29673955728768  | H | 3.41264730078624  | 14.36220248996881 | 11.95419555962635 |
| H  | 21.05983259052314 | 8.08593497479517   | 2.92844742500488  | H | 3.70143955558586  | 13.33145385487195 | 10.54880209233018 |
| H  | 21.85675287192364 | 8.76530083359108   | 1.49464391743085  | C | 7.84866819785698  | 13.28536786623352 | 10.90045983192114 |
| H  | 20.16384631512721 | 9.15431562358166   | 1.83575019950815  | H | 8.19359535085404  | 13.25403078577834 | 11.93018012028285 |
| C  | 21.71531562189937 | 11.42648739904622  | 2.19570987834281  | C | 11.94905720116389 | 12.07126333238862 | 11.74586018366003 |
| H  | 20.75282376419393 | 11.665146888478045 | 1.73202481221031  | H | 11.80135167890035 | 13.12540360730818 | 11.49677376327973 |
| H  | 22.43756209919629 | 11.23723522775167  | 1.39343226385230  | H | 11.67340204087840 | 11.92798461511853 | 12.80109157823015 |
| H  | 22.04781904280995 | 12.30779813799716  | 2.75510788595177  | H | 11.26029621189342 | 11.47642659794648 | 11.13752646255532 |
| Cl | 18.04774050238775 | 14.06644105807818  | 7.60247334178757  | C | 13.40101407304552 | 11.62702583375994 | 11.53623036892822 |
| C  | 11.33694725288029 | 10.08805342775069  | 4.98084693015451  | C | 2.93203587190885  | 14.37093865235237 | 5.41428882206330  |
| H  | 10.55652412223885 | 10.78235981640872  | 5.31294004139411  | H | 2.75815053547146  | 13.51824960281059 | 6.08094064801529  |
| H  | 11.08942047456634 | 9.08856346386113   | 5.36333869945100  | H | 1.97645211107221  | 14.61838711067146 | 4.93985106546872  |
| H  | 11.30549904873727 | 10.04082466321502  | 3.88848611992031  | H | 3.23170495483523  | 15.23424048591557 | 6.01973039063771  |
| C  | 15.14151814778759 | 11.96321343645605  | 3.06396012833839  | C | 10.86551859578806 | 9.59936771387061  | 1.07432390708560  |
| H  | 15.83571515194892 | 12.55366628531717  | 3.67008874195135  | H | 11.82505414533717 | 9.21762352047696  | 0.70883037484088  |
| H  | 15.42491094780268 | 12.09175445900056  | 2.00887955459264  | H | 10.09078776535030 | 9.34878596892690  | 0.33692566968053  |
| H  | 15.27205950056280 | 10.90983794599207  | 3.32514969577130  | H | 10.61871599371451 | 9.06483503291294  | 1.99927221139259  |
| C  | 13.32204088451796 | 10.48443622512366  | 13.29869304706203 | C | 13.51118131116155 | 10.12953655773229 | 11.87709077779151 |
| H  | 13.78950708344667 | 10.53617168997092  | 14.28640047564378 | H | 12.89601417745217 | 9.50518243330647  | 11.21807976975352 |
| H  | 12.94429077370205 | 9.46189178651976   | 13.16321313330105 | H | 13.16224869013037 | 9.95969878170793  | 12.90484464260861 |
| H  | 12.46476747877708 | 11.16722973837536  | 13.29283833201755 | H | 14.54661677389751 | 9.77988764536468  | 11.80267995536995 |
| C  | 13.61382472988839 | 13.93040281669264  | 2.91203938313263  | C | 15.69860692903697 | 14.02865802404324 | 9.81114380807464  |
| H  | 12.58371523957148 | 14.29752302985544  | 2.97518626547050  | H | 15.73772853551624 | 14.07011246975606 | 10.90349237038628 |
| H  | 13.97496331500252 | 14.08980003771059  | 1.88687125889154  | H | 15.92105638862291 | 15.03559348748778 | 9.43272351785176  |
| H  | 14.23299183207200 | 14.54749432736824  | 3.57411908837225  | H | 16.49147377255939 | 13.35372680841232 | 9.46877748569863  |

**Table S17.** Optimized Cartesian Coordinates for **3** and **4**. Level of theory: ZORA-B3LYP/TZP.

| <b>3</b> |                   |                  |                   | <b>4</b> |                   |                   |                   |
|----------|-------------------|------------------|-------------------|----------|-------------------|-------------------|-------------------|
| U        | 5.19413582272441  | 5.15373827590963 | 11.65393352774895 | Np       | 5.22866773625421  | 5.09271084342000  | 11.71264676066301 |
| Cl       | 4.27199281951165  | 6.20483331620019 | 9.46490376850933  | Cl       | 4.30860764962636  | 6.11290808842258  | 9.52278146224769  |
| P        | 1.36994268939166  | 2.19005912324781 | 12.37144311665533 | P        | 8.17308048605366  | 1.94130770195778  | 9.42913558642080  |
| P        | 8.19293723913686  | 2.02257606083167 | 9.39097435734300  | P        | 1.34980174945021  | 2.21459904752517  | 12.39440798109904 |
| O        | 6.89149658557946  | 4.14427754814718 | 10.80592204596537 | O        | 6.90330347217531  | 4.09863553444622  | 10.81033146926241 |
| O        | 3.37197837436717  | 4.23160302079082 | 12.32243583718663 | O        | 3.36503082471938  | 4.24269099307664  | 12.35694287191637 |
| C        | 6.91765512420523  | 7.10824806356526 | 12.55593818451306 | N        | 5.23434629057670  | 2.62569377760281  | 11.95539001571321 |
| C        | 4.77157343696990  | 7.18015759325796 | 13.47750967788283 | C        | 7.14879256063625  | 3.86737346945046  | 7.46560811549473  |
| N        | 5.24471066532611  | 6.64436653786542 | 11.91617446307788 | H        | 6.93303696250859  | 4.57721752182339  | 8.26818354175498  |
| C        | 6.86311208950681  | 6.13572713699070 | 13.61859274454162 | H        | 6.39734376941686  | 4.01388843054271  | 6.67740128788478  |
| C        | 8.11782203062355  | 7.56112447216884 | 11.74797672935500 | H        | 8.12392635810165  | 4.10633380665621  | 7.02973952474608  |
| H        | 8.77942993999033  | 6.70274318635413 | 11.59506998746335 | C        | 6.41833015737087  | 0.56628010001401  | 11.83348687386122 |
| C        | 8.90322529775105  | 8.62937168527760 | 12.52653494510861 | H        | 7.30043293486911  | 0.0165260813064   | 11.51935058363379 |
| H        | 8.29101660965394  | 9.52983779424785 | 12.65800684024560 | C        | 7.43827719551783  | 1.45993067226225  | 6.80599077252648  |
| H        | 9.81551573058511  | 8.91372785874126 | 11.98811655508931 | H        | 8.45268974554756  | 1.61498306737095  | 6.42737771772856  |
| H        | 9.18616030012443  | 8.27672747711237 | 13.5240545583068  | H        | 6.74355725006090  | 1.62832651856154  | 5.97196953942410  |
| C        | 7.74067827612511  | 8.09255198762188 | 10.36139125593326 | H        | 7.34934064228876  | 0.41278088238896  | 7.11679979817794  |
| H        | 7.17961399159300  | 7.35642217590555 | 9.77499318001472  | C        | 7.39378895438571  | 2.79988663347631  | 10.94265256623066 |
| H        | 8.64516643835089  | 8.35447179434597 | 9.80090985929435  | H        | 8.24874627614478  | 2.78936824675571  | 11.64461608828330 |
| H        | 7.12767874598392  | 8.99863179858571 | 10.43161512573822 | C        | 6.32662905122470  | 1.93538648288383  | 11.58759784560095 |
| C        | 5.65168440115513  | 7.73763697547309 | 12.52018158920271 | C        | 7.08085278498588  | 2.41743713368959  | 7.95714965356098  |
| H        | 5.37911351894137  | 8.52236289950291 | 11.82232120497826 | C        | 1.06140648180988  | 2.63934010852050  | 10.57104674882145 |
| C        | 5.52381912925151  | 6.18147873000750 | 14.19478718042557 | C        | 5.64022575204455  | 2.10536193261421  | 8.38740203362778  |
| C        | 5.16398978390210  | 5.28220366288832 | 15.25275198496331 | H        | 5.54487206788818  | 1.09520201392370  | 8.80453364054336  |
| C        | 3.81123068432072  | 5.28424578754340 | 15.91306734988123 | H        | 4.98099732738293  | 2.16926314588763  | 7.51193825698432  |
| H        | 3.79239585927029  | 4.56231996987976 | 16.73552846243167 | H        | 5.27897387883282  | 2.82797570006626  | 9.12276814794297  |
| H        | 3.01548482639579  | 5.01518383248262 | 15.20952457867926 | C        | 5.34364954504864  | -0.06628588969559 | 12.45667940736396 |
| H        | 3.55721509312854  | 6.26829144924139 | 16.32278768710777 | H        | 5.38797725707348  | -1.13500678746712 | 12.65690890711791 |
| C        | 6.12993356037541  | 4.39754130411545 | 15.68822526154076 | C        | 4.17795324299086  | 2.02248361408689  | 12.52575518789134 |
| H        | 5.8885251261450   | 3.71346406133393 | 16.50031984338380 | C        | 4.20318799499420  | 0.65658660153845  | 12.80339970689819 |
| C        | 7.42897877967798  | 4.35312582979407 | 15.12933251717940 | H        | 3.33829697595251  | 0.17871161430762  | 13.25404338367355 |
| H        | 8.14429686668445  | 3.63682925089888 | 15.53055382438821 | C        | 2.33342540963543  | 2.19895187415952  | 9.83194977397561  |
| C        | 7.82592385784820  | 5.19131123289304 | 14.10706312092840 | H        | 3.16848109863085  | 2.87154695597629  | 10.04036582225138 |
| C        | 9.23213718884477  | 5.09870975562554 | 13.57803668286806 | H        | 2.14928788311780  | 2.22887051778071  | 8.750004628278690 |
| H        | 9.830305191131584 | 4.36255113505029 | 14.15233856927464 | H        | 2.62756803866552  | 1.17473956255986  | 10.09316456222629 |
| H        | 9.75852776762088  | 6.05746891933634 | 13.64226395257530 | C        | 3.03966747871754  | 2.97560204813450  | 12.83883932536991 |
| H        | 9.25016949720053  | 4.79353943159559 | 12.52581869085922 | H        | 2.96618343951947  | 2.99911749604078  | 13.94252951311610 |
| C        | 3.38848792802013  | 7.72224667566436 | 13.78089723253832 | C        | 10.52684505630242 | 2.43969601827411  | 8.00895860285819  |

|   |                   |                   |                   |   |                   |                  |                    |
|---|-------------------|-------------------|-------------------|---|-------------------|------------------|--------------------|
| H | 2.77614394892845  | 6.91009623989294  | 14.18530175440952 | H | 10.52762146840985 | 1.35377539390072 | 7.85628973948698   |
| C | 3.47874255035390  | 8.82261007298304  | 14.85152363861885 | H | 11.57203949943184 | 2.77666964358721 | 8.02597342764430   |
| H | 3.98590478408100  | 8.46723454835674  | 15.75474668200688 | H | 10.04508980586658 | 2.91001182634185 | 7.14652885040180   |
| H | 2.47952324969642  | 9.17714737466080  | 15.13245079072271 | C | -1.26009614555815 | 2.93266563611934 | 13.10267932725904  |
| H | 4.04900176824003  | 9.67825951951005  | 14.47017921469976 | H | -1.52231307041877 | 3.39602319024612 | 12.14694015457309  |
| C | 2.66708816054007  | 8.25365975112592  | 12.53784033169255 | H | -1.93734564541575 | 3.34397219037564 | 13.86329083655782  |
| H | 3.18845290817946  | 9.11725355191551  | 12.10877543448784 | H | -1.45216540134315 | 1.85549410530437 | 13.03056058180205  |
| H | 1.65581122734997  | 8.58263574707033  | 12.80261043277318 | C | 9.83968660209875  | 4.35545616129108 | 9.47185876995938   |
| H | 2.58154418204195  | 7.49364716027798  | 11.75329854687803 | H | 9.34599955133909  | 4.84635992800486 | 8.63055796279566   |
| C | 7.40290506351730  | 2.85008425327397  | 10.91316538470482 | H | 10.87537465576191 | 4.72190173341129 | 9.51410351803164   |
| C | 6.34408341154356  | 1.96807856018841  | 11.54795657876859 | H | 9.32508512738081  | 4.67851328597815 | 10.38012746386961  |
| C | 4.20039900718452  | 2.02452792395960  | 12.48863326444724 | C | 10.68672143297258 | 2.22486788506079 | 10.47375288909288  |
| C | 3.05249836352953  | 2.96355003310140  | 12.80986907559186 | H | 10.28968322282084 | 2.47467260273399 | 11.46481433946579  |
| H | 2.98626700247483  | 2.99134051059282  | 13.91325827840939 | H | 11.70811138799611 | 2.62565220820591 | 10.42582837152002  |
| C | 1.07409095389579  | 2.60299689217447  | 10.54615512868699 | H | 10.74312453101078 | 1.13334265946299 | 10.39645478320868  |
| C | 2.34814829057774  | 2.17132281690005  | 9.80501986087321  | C | 9.84858587893310  | 2.82833444937717 | 9.33117622722670   |
| H | 2.16101322314371  | 2.19695121731432  | 8.72350479568418  | C | 0.76785919165828  | 4.10248717780555 | 10.22307228912938  |
| H | 2.65094585678839  | 1.15028138921006  | 10.06840515343429 | H | -0.19437983152548 | 4.43430717761537 | 10.62556244318885  |
| H | 3.17924272396051  | 2.84983071708848  | 10.01040904447152 | H | 0.71531458677300  | 4.20746070852788 | 9.13048057834868   |
| C | -0.07081086183126 | 1.69341002866717  | 10.06388487045325 | H | 1.55506529961321  | 4.76974130580629 | 10.58399896963629  |
| H | -1.02698546281349 | 1.93074955225023  | 10.53878973820701 | C | -0.09130613195918 | 1.74372916785777 | 10.081442278990209 |
| H | 0.15109363810088  | 0.63789774281867  | 10.25829339066883 | H | 0.11789519635828  | 0.68518308858387 | 10.27377761954879  |
| H | -0.19762288811687 | 1.82165306017351  | 8.98039039442168  | H | -0.21221418407996 | 1.87625878824956 | 8.99775163473238   |
| C | 0.76316186834616  | 4.06109804114019  | 10.19158510397107 | H | -1.04688855339771 | 1.99032984030807 | 10.55290670007550  |
| H | 0.78660775127126  | 4.16067474082271  | 9.09863882748236  | C | 0.41184193117809  | 4.74538944518447 | 13.543894478907060 |
| H | 1.54150472794508  | 4.74020622843464  | 10.54912555326301 | H | 1.44091594786825  | 5.00248499889533 | 13.80800405148748  |
| H | -0.20269656065649 | 4.38305090292733  | 10.59331417449414 | H | -0.25720089339161 | 5.19138148538789 | 14.29396524286477  |
| C | 0.20494986539420  | 3.19880808974865  | 13.48108996106351 | H | 0.19857117143555  | 5.21898154102650 | 12.58314454747081  |
| C | 0.42128853101178  | 2.63991043361080  | 14.90017930671101 | C | 0.19209390639855  | 3.22847256439379 | 13.526458111665    |
| H | 1.42908092066366  | 2.84050439542838  | 15.28243549178856 | C | 0.39971115914331  | 2.65898037378662 | 14.92356649141921  |
| H | 0.25461946331068  | 1.55749405589170  | 14.93430509683854 | H | 0.21862868310762  | 1.57865867057708 | 14.95161892026136  |
| H | -0.28627262301081 | 3.11851459824261  | 15.59024980225689 | H | -0.30183934143990 | 3.14300806435138 | 15.61611594533937  |
| C | -1.24477814047665 | 2.88533278956822  | 13.08037314910501 | H | 1.40988906289069  | 2.84388398673778 | 12.30766733947697  |
| H | -1.42581070311994 | 1.850378728404755 | 13.01619575325435 | C | 5.68965476777728  | 7.69763509761864 | 15.53656833186539  |
| H | -1.51285648060473 | 3.33933435550271  | 12.12179381534840 | H | 5.41712351723170  | 8.47888517171558 | 11.83504076195186  |
| H | -1.92493516386193 | 3.29515436646769  | 13.83907737124859 | C | 6.95197826185677  | 7.06204175574682 | 12.56748285512191  |
| C | 0.40842320671809  | 4.71879981824404  | 13.50744648291025 | C | 6.89362359079947  | 6.08433278295754 | 13.62387097382295  |
| H | -0.26005152498781 | 5.16122385208268  | 14.25979811055329 | C | 7.850280444086623 | 5.12702822905691 | 14.10263141797880  |
| H | 0.18206923067435  | 5.18405974834976  | 12.54575790652187 | C | 3.83954996407651  | 5.24073766198700 | 15.92037672631003  |
| H | 1.43641726017204  | 4.98863092661594  | 13.76273341042332 | H | 3.03923439919964  | 4.99001901305169 | 15.21553359815337  |
| C | 4.24173345386717  | 0.65820806433563  | 12.76172487331449 | H | 3.59931021684486  | 6.22321830999248 | 16.34182482601413  |
| H | 3.38404424759233  | 0.16932917971552  | 13.21442215382837 | H | 3.81467561277314  | 4.50962817367119 | 16.73448006467196  |
| C | 5.38940456141086  | -0.05034982818509 | 12.40880030730675 | C | 4.81022414247687  | 7.14668915797676 | 13.49646833374805  |
| H | 5.44750503100556  | -1.11910370086302 | 12.60490196311352 | C | 7.44483121396687  | 4.27792854800858 | 15.11139058906313  |
| C | 6.45430389735013  | 0.59899113761294  | 11.78620029690977 | H | 8.15337302176162  | 3.54993979841340 | 15.50349338254289  |
| H | 7.34348472587120  | 0.06265334443898  | 11.46873539686528 | C | 3.42848061860940  | 7.69056861314598 | 13.79852590029979  |
| H | 7.09861825396628  | 2.50233804065685  | 7.92174390351755  | H | 2.81211693200925  | 6.87635458679864 | 14.19190681225928  |
| C | 7.15324532247028  | 3.95779574028389  | 7.44481886662670  | C | 6.14585647710346  | 4.32797467431767 | 15.67381243554588  |
| H | 6.40092723636778  | 4.10569824555109  | 6.65781734345118  | H | 5.90001729083381  | 3.63562054914442 | 16.47745905372102  |
| H | 8.12649926900144  | 4.20998548325879  | 7.01226771025834  | C | 9.25678753277114  | 5.03368599395256 | 13.57520931727511  |
| H | 6.93114799983901  | 4.65824080730636  | 8.25378378642750  | H | 9.27552989664897  | 4.73923380824430 | 12.52010259694230  |
| C | 7.46937103569325  | 1.56087914590968  | 6.76137584607085  | H | 9.82363240301049  | 4.28963487850815 | 14.14329735173582  |
| H | 6.77752852231714  | 1.73340149532997  | 5.92586827117109  | H | 9.78600883560110  | 5.99009748431817 | 13.65051107897113  |
| H | 7.38710492261019  | 0.50976524364713  | 7.06014373164622  | C | 5.55527427047017  | 6.13674151673355 | 14.20413221437060  |
| H | 8.48447333008285  | 1.72812536917685  | 6.38997898583711  | C | 8.14871168012181  | 7.50437196715673 | 11.74974192748191  |
| C | 5.66023938276412  | 2.16952412561607  | 8.34466234416571  | H | 8.80337361303027  | 6.64109964613559 | 11.59537903687701  |
| H | 5.28876436675705  | 2.87881353834596  | 9.08804271374472  | C | 5.18956686907586  | 5.22995451556275 | 15.25536817090272  |
| H | 5.57557861870290  | 1.15394923524043  | 8.75070580392274  | C | 2.71522870327068  | 8.23718068001547 | 12.55755975548509  |
| H | 5.00247387515522  | 2.23562379227876  | 7.46834965253502  | H | 3.23684945999973  | 9.10932632069692 | 12.14626054888975  |
| C | 9.85681919269390  | 2.93199675678442  | 9.30878072599204  | H | 1.70103953292116  | 8.55901839726125 | 12.81997049751194  |
| C | 9.82704193296057  | 4.45730085647008  | 9.46561156293449  | H | 2.63994628994930  | 7.48739746977787 | 11.76260025832878  |
| H | 9.30355801706652  | 4.76364160193104  | 10.37469990313550 | C | 7.76538749594625  | 8.03475123244748 | 10.36459000815372  |
| H | 9.33237885909386  | 4.95069675821765  | 8.62625986629410  | H | 7.19230036382519  | 7.30144708390851 | 9.78697911442008   |
| H | 10.85738248302408 | 4.83699551605914  | 9.51827782360841  | H | 8.66828198125245  | 8.28622361108525 | 9.79676249160921   |
| C | 10.54467551015661 | 2.56581788508866  | 7.98492335323897  | H | 7.16229618989021  | 8.94734451663144 | 10.43688342784151  |
| H | 10.05932661808284 | 3.03792040027242  | 7.12547620564272  | C | 3.51944734980840  | 8.78031056307944 | 14.88009304007615  |
| H | 10.56100814440147 | 1.48157414331956  | 7.82182725945753  | H | 4.02124186193623  | 8.41541058864425 | 15.78254734263968  |
| H | 11.58490252745527 | 9.1709695340765   | 8.00913738734451  | H | 2.52030722634248  | 9.13589592215444 | 9.13589592215444   |
| H | 8.25667662321497  | 2.84300814873843  | 11.61566829056252 | H | 4.09409846002839  | 9.63747872564856 | 14.50882338007411  |
| C | 10.69883542557404 | 2.32798452825553  | 10.44850840018729 | C | 8.94568748138230  | 8.56911710013430 | 12.52164214050153  |

|   |                   |                  |                   |   |                  |                  |                   |
|---|-------------------|------------------|-------------------|---|------------------|------------------|-------------------|
| H | 10.29857742148569 | 2.56805537398312 | 11.44059595359153 | H | 8.33946832610662 | 9.47290139178707 | 12.65801201590822 |
| H | 11.71657205859068 | 2.73816275570179 | 10.40428832398277 | H | 9.85434189274389 | 8.84849066855676 | 11.97468004210517 |
| H | 10.76502002910873 | 1.23755446098728 | 10.36401585823828 | H | 9.23628893324026 | 8.21555832229305 | 13.51672524795485 |

**Table S18.** Optimized Cartesian Coordinates for the models of **1** and **2**. Level of theory: ZORA-B3LYP/TZP.

| <b>1</b> |                   |                   |                   | <b>2</b> |                   |                   |                   |
|----------|-------------------|-------------------|-------------------|----------|-------------------|-------------------|-------------------|
| U        | 16.95568546509300 | 12.15218128094997 | 7.96248463518448  | Np       | 10.20309373181746 | 12.11050337775867 | 6.83106417855491  |
| P        | 14.54329022105435 | 12.22610845416566 | 12.04921158498539 | Cl       | 10.72283344689564 | 14.67597865138884 | 6.57778928945659  |
| Cl       | 16.34983070470081 | 9.55532581790773  | 8.07992350516939  | P        | 12.48030869643307 | 11.52341246688395 | 2.73759766021844  |
| P        | 13.02418438586717 | 12.27743666418135 | 5.32348956402616  | Cl       | 8.93159073218531  | 9.85037055875337  | 7.24262332320929  |
| H        | 20.80797748098690 | 11.35334946482486 | 1.69877380527564  | P        | 14.13059310548093 | 11.88386674259769 | 9.42580886523917  |
| H        | 22.34713786631551 | 10.52910628442701 | 1.36507979895060  | O        | 10.56829545128917 | 11.62591597737503 | 4.75846679524719  |
| H        | 22.25320462582659 | 11.75316735641830 | 2.65741817642355  | O        | 11.49415496898371 | 11.81079247038437 | 5.17928621649727  |
| Cl       | 18.02848958352567 | 14.55941368353404 | 7.75519803244715  | N        | 12.19939085130443 | 10.67103769049919 | 6.41205331276205  |
| O        | 15.65892324213949 | 12.46856827091107 | 6.27061738906955  | N        | 8.44723803339342  | 12.90805418313762 | 8.58549831373029  |
| C        | 14.49042429131227 | 13.23432099279084 | 6.10097142133032  | N        | 7.84937109483098  | 12.83741904304030 | 5.96680302779824  |
| H        | 14.67867557228291 | 14.05901008857563 | 5.38588587063137  | C        | 12.40819491259949 | 10.18974347467396 | 5.19728621649727  |
| C        | 12.94007189577803 | 10.84378243247627 | 6.49423796681300  | C        | 5.59699358984677  | 13.55641684824147 | 6.30532614152109  |
| H        | 22.48173533848632 | 8.39816935048767  | 11.20046809979138 | H        | 4.81939126876358  | 13.85587919334217 | 6.99670739813321  |
| C        | 21.51931590752812 | 10.61217995775786 | 8.52433971235481  | C        | 14.00845381550206 | 9.39102517264699  | 7.27750913692889  |
| H        | 22.26459416526258 | 10.20722569032820 | 7.84441206417831  | H        | 14.63161837546000 | 9.10855272037231  | 8.12134327646300  |
| C        | 20.79581454121751 | 10.39781879960347 | 5.61728619940081  | C        | 6.86445108082251  | 13.22003015667939 | 6.79445015137093  |
| H        | 21.74824250939576 | 9.98058390467381  | 5.93468437433332  | C        | 14.22604513071328 | 8.86822537603687  | 6.00322247041053  |
| C        | 20.45732459224525 | 10.39023617971002 | 4.26303392936889  | H        | 15.02871730937140 | 8.15180645899354  | 5.84137963128060  |
| C        | 21.36579336131888 | 9.81422808331210  | 3.17458031902758  | C        | 13.42791353386818 | 9.26987088727400  | 4.93283290996617  |
| C        | 18.38364654721153 | 11.44375936336253 | 4.92609545797442  | H        | 13.59402362022993 | 8.89254539904885  | 3.92775983872270  |
| C        | 13.92145190776056 | 11.50089491186344 | 3.87928297008089  | C        | 11.46432488646722 | 10.76136858008375 | 4.14627689869369  |
| H        | 23.26945559639260 | 10.02297476389080 | 4.25288613201238  | H        | 10.92581202824602 | 9.92479456106535  | 3.66480543571791  |
| H        | 23.28741733351447 | 8.85083607382203  | 2.92229682547499  | C        | 7.19645546542240  | 13.25979802140878 | 8.24803376595130  |
| H        | 22.49369418026527 | 8.42541349356124  | 4.45072849473755  | C        | 6.60524130728737  | 13.65473907050172 | 10.57368554846607 |
| C        | 23.84271617107943 | 11.61160253749034 | 11.07123217629039 | C        | 12.96950548007487 | 10.30682791021648 | 7.44604190775405  |
| C        | 14.07055137352583 | 13.81152273798867 | 7.43180108699004  | C        | 12.60036850152084 | 10.99766415775698 | 8.73865996894195  |
| C        | 12.99811525179878 | 14.67858414223130 | 7.64740757364620  | H        | 12.37679074222787 | 10.22444416018047 | 9.49601362864624  |
| H        | 12.37978082456691 | 15.00668263616673 | 6.81152809272599  | C        | 14.27197473392720 | 13.25128963245528 | 8.19742591938550  |
| C        | 12.74189096574081 | 15.10723055690491 | 8.95266005619774  | C        | 8.79408211895902  | 12.92133755735906 | 9.87642902477618  |
| H        | 11.91218691862452 | 15.78870076222890 | 9.14833870152751  | H        | 9.81889968520811  | 12.62089594299425 | 10.09088354159767 |
| C        | 13.54127894746069 | 14.66141732983820 | 10.00808698033525 | C        | 6.26259584963559  | 13.63613364699552 | 9.22011521328147  |
| H        | 13.35124047837738 | 14.97605728158829 | 11.03460729766099 | H        | 5.26046833397256  | 13.91441483041755 | 8.91860482072675  |
| C        | 14.59583619889202 | 13.79193587755521 | 9.72190060866691  | H        | 4.81296939964834  | 14.83611180422082 | 2.57770889281944  |
| N        | 14.84524230361625 | 13.39490576791116 | 8.45598821834082  | H        | 6.40400954215197  | 12.58450053933896 | 13.11223317479656 |
| C        | 15.54539988847262 | 13.18681809758359 | 10.72847851888137 | C        | 4.12040722783084  | 15.06179637461336 | 3.39492960296175  |
| H        | 16.03639639827442 | 13.9655414447078  | 11.30367274302560 | H        | 4.50155434361537  | 15.94025640755820 | 3.92727284211304  |
| C        | 15.96048970772336 | 11.40742976704754 | 12.91967590028445 | C        | 5.62107599252230  | 14.0509596743578  | 11.67638099617885 |
| H        | 23.22157335929117 | 12.06784257458277 | 11.85437635239273 | C        | 5.32123311833897  | 13.50789258659106 | 4.93728699527889  |
| C        | 20.61373139572605 | 8.67699202309025  | 2.44650698821987  | C        | 13.15469188943772 | 13.00252176832400 | 3.60680540280752  |
| C        | 22.67586423537146 | 9.24880383251377  | 3.74436508768353  | C        | 7.60404383140951  | 12.78540680636062 | 4.65390036987848  |
| H        | 24.81164545872703 | 11.34542982048193 | 11.51923822351426 | H        | 8.43801123899543  | 12.46088573659328 | 4.03327231365098  |
| H        | 17.40138898924335 | 11.85959655628672 | 4.69278284012148  | C        | 11.09231690752857 | 12.31271836157028 | 1.81285713437365  |
| C        | 19.20755872115537 | 10.94853082107615 | 3.92983780865172  | H        | 3.15197480818219  | 15.32264840672782 | 2.95276091397346  |
| H        | 18.86215785211155 | 10.99389650970524 | 2.89688875755503  | C        | 4.24236889855805  | 14.42304624341612 | 11.11829266690301 |
| H        | 24.01908460243980 | 12.36756938245163 | 10.29246013296268 | H        | 4.29558662523153  | 15.28223140861589 | 10.43950365267907 |
| C        | 13.93289254952234 | 10.81039635939892 | 11.02153958655733 | H        | 3.57839692380341  | 14.69749596647776 | 11.94478134785712 |
| H        | 20.36024956896611 | 7.86469714632105  | 3.14301090110704  | C        | 6.37314047798848  | 13.11013507988388 | 4.10233567498023  |
| H        | 21.24859255184921 | 8.26207802801495  | 1.64964082099477  | H        | 6.24844110013688  | 13.04514494014571 | 3.02521312617231  |
| H        | 19.68232972661430 | 9.03315397576615  | 1.98511049577530  | C        | 3.95409560451789  | 13.86490135612975 | 4.35066057082854  |
| C        | 21.70978073283858 | 10.93332213541197 | 2.16550975693319  | H        | 3.29278326844596  | 11.78320368398140 | 4.22630153817101  |
| O        | 16.50919508308349 | 12.41341479638995 | 10.05910993991121 | C        | 6.18561880228282  | 15.26470061195806 | 12.43920919697446 |
| N        | 18.71590180665991 | 11.44266958625508 | 6.23560915028693  | H        | 7.15645259604416  | 15.04395176965613 | 12.89415968666755 |
| C        | 19.92998894087231 | 10.93377061072754 | 6.58237793387168  | C        | 13.30701270319577 | 12.78947397872190 | 10.80608158505564 |
| C        | 20.27219889259523 | 11.00614449855595 | 8.01636320521701  | H        | 3.77761466030394  | 13.58423066393257 | 6.08715374828873  |
| N        | 19.31011100887395 | 11.51478492414167 | 8.83105224679476  | C        | 7.91831045380818  | 13.28324746304282 | 10.88984322192842 |
| C        | 19.59516458955300 | 11.64448590902471 | 10.14326690291157 | H        | 8.27158100238231  | 13.26891797902229 | 11.91698916482702 |
| H        | 18.79097090930626 | 12.05267371264929 | 10.75874307518957 | H        | 5.49667125144064  | 15.55293142700767 | 13.24147519717810 |
| C        | 20.81379500792890 | 11.28538638463560 | 10.69771108495170 | H        | 3.25565405495790  | 15.1238166436031  | 6.00316924277893  |
| H        | 20.96390176738135 | 11.43027249496636 | 11.76752834209171 | C        | 3.41102985638252  | 12.65256313020222 | 3.57008676715684  |
| C        | 21.82383356415205 | 10.74416126546164 | 9.88097774584409  | H        | 4.07406765544829  | 12.36693032233844 | 2.74728992568462  |

|   |                   |                   |                   |   |                   |                   |                   |
|---|-------------------|-------------------|-------------------|---|-------------------|-------------------|-------------------|
| C | 23.17781210588342 | 10.34925265210155 | 10.47609196730082 | H | 2.43154505737174  | 12.89485856289973 | 3.14240484322065  |
| C | 24.12333348619561 | 9.74353933040687  | 9.42723117589835  | H | 6.31327228894663  | 16.12421097427264 | 11.77177781692122 |
| H | 23.70444362747044 | 8.83081801232403  | 8.97776812069499  | C | 5.45443866749346  | 12.86437534709482 | 12.64489635526757 |
| H | 25.07267838297082 | 9.47005612113615  | 9.90900489436230  | H | 5.06232575936069  | 11.98373571054026 | 12.12433694611716 |
| H | 24.35508309518862 | 10.45720953375775 | 8.62280161550646  | H | 4.75273959000240  | 13.13137968180682 | 13.44345787688976 |
| C | 22.95579431680763 | 9.30808034148603  | 11.59624747237490 | C | 2.93791402284404  | 14.24164375693192 | 5.43537257249267  |
| H | 22.32016601089192 | 9.70141082995811  | 12.40146543159215 | H | 2.76553142314358  | 13.41661206924071 | 6.13632164871389  |
| H | 23.92336589922562 | 9.02763768827697  | 12.03796350985201 | H | 1.97780709607632  | 14.48194261582978 | 4.96639225048842  |
| H | 13.92899468848520 | 10.40560671658245 | 6.69015957966266  | H | 14.98718845519923 | 13.98874599802499 | 8.57785249840418  |
| H | 12.28148869163338 | 10.08260113816514 | 6.05267311089141  | H | 13.31070773794512 | 13.74365703452018 | 8.01126667854142  |
| H | 12.48836478143802 | 11.16918691389302 | 7.44186133741893  | H | 14.66802514805334 | 12.86044924709145 | 7.25384843118486  |
| H | 14.90274641961478 | 11.97345744227273 | 3.74017036947503  | H | 13.95567962489727 | 12.69640576986682 | 4.28834631336749  |
| H | 13.33068175714562 | 11.63025992951587 | 2.96328105697065  | H | 12.38409040922628 | 13.54045373165808 | 4.17069146370890  |
| H | 14.08097871013256 | 10.42886339013756 | 4.05428306722706  | H | 13.59247819072171 | 13.67547082276552 | 2.86161604295153  |
| H | 16.63010184443446 | 10.90189403419069 | 12.21017570270644 | H | 11.50873703574172 | 12.94678793345213 | 1.02304536648353  |
| H | 15.55373521678683 | 10.67257945828858 | 13.62847994558395 | H | 10.47051371365932 | 12.92189899422721 | 2.47761391649798  |
| H | 16.52429035614327 | 12.15738737049604 | 13.49209238243581 | H | 10.47809413429893 | 11.54049361086434 | 1.33739946665459  |
| H | 14.72709718500223 | 10.36966972883900 | 10.40204563929704 | H | 13.02175912927480 | 12.08239897755851 | 11.59250693924866 |
| H | 13.11065892742640 | 11.15078813044407 | 10.37687123998693 | H | 12.42042898869961 | 13.32706865587196 | 10.45334684215137 |
| H | 13.53065757922561 | 10.04427961727656 | 11.69960679760521 | H | 14.01809326971343 | 13.50296085299142 | 11.23574214555613 |

**Table S19.** NLMO/NPA bond orders for complexes 1 – 4.

| Bond                     | NLMO/NPA Bond Orders |      |      |      |
|--------------------------|----------------------|------|------|------|
|                          | 1                    | 2    | 3    | 4    |
| An – O1                  | 0.21                 | 0.22 | 0.21 | 0.20 |
| An – O2                  | 0.22                 | 0.23 | 0.22 | 0.20 |
| An – N <sub>ONO</sub>    | 0.12                 | 0.12 | 0.11 | 0.12 |
| An – N1 <sub>dtbpy</sub> | 0.11                 | 0.10 | -    | -    |
| An – N2 <sub>dtbpy</sub> | 0.11                 | 0.10 | -    | -    |
| An – C <sub>A</sub>      | -                    | -    | 0.21 | 0.20 |
| An – C <sub>B</sub>      | -                    | -    | 0.24 | 0.25 |
| An – C <sub>C</sub>      | -                    | -    | 0.26 | 0.32 |
| An – C <sub>D</sub>      | -                    | -    | 0.22 | 0.21 |
| An – C <sub>E</sub>      | -                    | -    | 0.21 | 0.22 |

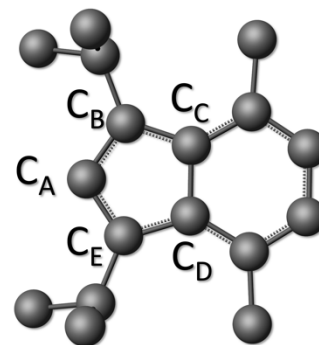



**Table S20.** Second-Order Perturbation Stabilization Energies [ $E(2)$ , kcal/mol] of Donor (D) – Acceptor (A) interactions in **1**. The total stabilization for each ligand is specified, along with the most important contributions (over 5 kcal/mol). LP = Lone pair.

| Ligand        | Total Stabilization Energy (kcal/mol)         | Most important interactions |                                                |       |
|---------------|-----------------------------------------------|-----------------------------|------------------------------------------------|-------|
|               |                                               | D→A                         | Composition of An Orbital                      | E(2)  |
| Cl            | 255                                           | Cl1 (LP1) → An              | <i>s</i> (30%), <i>f</i> (34%), <i>d</i> (36%) | 7.74  |
|               |                                               | Cl1 (LP2) → An              | <i>f</i> (81%), <i>d</i> (19%)                 | 11.68 |
|               |                                               | Cl1(LP3) → An               | <i>s</i> (22%), <i>f</i> (14%), <i>d</i> (64%) | 5.01  |
|               |                                               | Cl1 ( $\sigma$ ) → An       | <i>f</i> (92%), <i>d</i> (8%)                  | 11.23 |
|               |                                               | Cl1 ( $\sigma$ ) → An       | <i>s</i> (30%), <i>f</i> (34%), <i>d</i> (36%) | 40.69 |
|               |                                               | Cl2 (LP1) → An              | <i>s</i> (30%), <i>f</i> (34%), <i>d</i> (36%) | 6.15  |
|               |                                               | Cl2 (LP2) → An              | <i>s</i> (22%), <i>f</i> (14%), <i>d</i> (64%) | 5.84  |
|               |                                               | Cl2 (LP3) → An              | <i>f</i> (13%), <i>d</i> (87%)                 | 8.86  |
|               |                                               | Cl2 ( $\sigma$ ) → An       | <i>f</i> (92%), <i>d</i> (8%)                  | 19.86 |
|               |                                               | Cl2 ( $\sigma$ ) → An       | <i>s</i> (30%), <i>f</i> (34%), <i>d</i> (36%) | 31.39 |
|               |                                               | Cl2 ( $\sigma$ ) → An       | <i>s</i> (1%), <i>f</i> (51%), <i>d</i> (48%)  | 6.75  |
| ONO           | 228                                           | N → An                      | <i>s</i> (2%), <i>f</i> (67%), <i>d</i> (31%)  | 6.33  |
|               |                                               | N → An                      | <i>s</i> (1%), <i>f</i> (51%), <i>d</i> (48%)  | 16.28 |
|               |                                               | N → An                      | <i>s</i> (22%), <i>f</i> (14%), <i>d</i> (64%) | 5.41  |
|               |                                               | O1 (LP1) → An               | <i>s</i> (2%), <i>f</i> (67%), <i>d</i> (31%)  | 6.74  |
|               |                                               | O1 (LP1) → An               | <i>f</i> (13%), <i>d</i> (87%)                 | 5.45  |
|               |                                               | O1 (LP1) → An               | <i>s</i> (42%), <i>f</i> (9%), <i>d</i> (49%)  | 9.84  |
|               |                                               | O1 (LP2) → An               | <i>f</i> (81%), <i>d</i> (19%)                 | 7.76  |
|               |                                               | O1 (LP2) → An               | <i>s</i> (2%), <i>f</i> (67%), <i>d</i> (31%)  | 8.97  |
|               |                                               | O1 (LP2) → An               | <i>s</i> (42%), <i>f</i> (9%), <i>d</i> (49%)  | 6.97  |
|               |                                               | O1 (LP3) → An               | <i>f</i> (77%), <i>d</i> (23%)                 | 7.09  |
|               |                                               | O2 (LP1) → An               | <i>s</i> (2%), <i>f</i> (67%), <i>d</i> (31%)  | 6.82  |
|               |                                               | O2 (LP1) → An               | <i>s</i> (42%), <i>f</i> (9%), <i>d</i> (49%)  | 9.20  |
|               |                                               | O2 (LP1) → An               | <i>f</i> (21%), <i>d</i> (79%)                 | 6.96  |
|               |                                               | O2 (LP2) → An               | <i>f</i> (81%), <i>d</i> (19%)                 | 6.67  |
|               |                                               | O2 (LP2) → An               | <i>s</i> (2%), <i>f</i> (67%), <i>d</i> (31%)  | 10.43 |
| O2 (LP2) → An | <i>s</i> (42%), <i>f</i> (9%), <i>d</i> (49%) | 7.25                        |                                                |       |
| O2 (LP3) → An | <i>f</i> (77%), <i>d</i> (23%)                | 8.42                        |                                                |       |
| dtbpy         | 99                                            | N1 → An                     | <i>f</i> (77%), <i>d</i> (23%)                 | 6.98  |
|               |                                               | N1 → An                     | <i>f</i> (13%), <i>d</i> (87%)                 | 5.09  |
|               |                                               | N1 → An                     | <i>s</i> (42%), <i>f</i> (9%), <i>d</i> (49%)  | 6.78  |
|               |                                               | N2 → An                     | <i>f</i> (77%), <i>d</i> (23%)                 | 7.71  |
|               |                                               | N2 → An                     | <i>s</i> (42%), <i>f</i> (9%), <i>d</i> (49%)  | 6.74  |
|               |                                               | N2 → An                     | <i>f</i> (21%), <i>d</i> (79%)                 | 5.02  |

**Table S21.** Second-Order Perturbation Stabilization Energies [ $E(2)$ , kcal/mol] of Donor (D) – Acceptor (A) interactions in **2**. The total stabilization for each ligand is specified, along with the most important contributions (over 5 kcal/mol). LP = Lone pair, LV = Lone vacant.

| Ligand        | Total Stabilization Energy (kcal/mol)        | Most important interactions |                                                |       |
|---------------|----------------------------------------------|-----------------------------|------------------------------------------------|-------|
|               |                                              | D→A                         | Composition of An Orbital                      | E(2)  |
| Cl            | 241                                          | Cl1 (LP2) → An              | <i>f</i> (1%), <i>d</i> (99%)                  | 8.05  |
|               |                                              | Cl1 ( $\sigma$ ) → An       | <i>f</i> (92%), <i>d</i> (8%)                  | 22.20 |
|               |                                              | Cl1 ( $\sigma$ ) → An       | <i>s</i> (7%), <i>f</i> (86%), <i>d</i> (7%)   | 7.83  |
|               |                                              | Cl1 ( $\sigma$ ) → An       | <i>s</i> (26%), <i>f</i> (34%), <i>d</i> (40%) | 22.50 |
|               |                                              | Cl1 ( $\sigma$ ) → An       | <i>s</i> (2%), <i>f</i> (40%), <i>d</i> (58%)  | 11.75 |
|               |                                              | Cl2 (LP1) → An              | <i>s</i> (26%), <i>f</i> (34%), <i>d</i> (40%) | 6.10  |
|               |                                              | Cl2 (LP2) → An              | <i>f</i> (1%), <i>d</i> (99%)                  | 8.10  |
|               |                                              | Cl2 (LP3) → An              | <i>s</i> (7%), <i>f</i> (86%), <i>d</i> (7%)   | 5.48  |
|               |                                              | Cl2 ( $\sigma$ ) → An       | <i>s</i> (7%), <i>f</i> (86%), <i>d</i> (7%)   | 11.67 |
|               |                                              | Cl2 ( $\sigma$ ) → An       | <i>s</i> (26%), <i>f</i> (34%), <i>d</i> (40%) | 28.52 |
|               |                                              | Cl2 ( $\sigma$ ) → An       | <i>s</i> (2%), <i>f</i> (40%), <i>d</i> (58%)  | 12.62 |
| ONO           | 238                                          | N → An                      | <i>s</i> (26%), <i>f</i> (34%), <i>d</i> (40%) | 8.10  |
|               |                                              | N → An                      | <i>s</i> (2%), <i>f</i> (40%), <i>d</i> (58%)  | 7.22  |
|               |                                              | N → An                      | <i>s</i> (31%), <i>f</i> (5%), <i>d</i> (64%)  | 8.93  |
|               |                                              | O1 (LP1) → An               | <i>s</i> (7%), <i>f</i> (86%), <i>d</i> (7%)   | 8.21  |
|               |                                              | O1 (LP1) → An               | <i>s</i> (30%), <i>f</i> (19%), <i>d</i> (51%) | 9.95  |
|               |                                              | O1 (LP1) → An               | <i>f</i> (26%), <i>d</i> (74%)                 | 8.32  |
|               |                                              | O1 (LP3) → An               | <i>s</i> (7%), <i>f</i> (86%), <i>d</i> (7%)   | 9.36  |
|               |                                              | O1 (LP3) → An               | <i>f</i> (97%), <i>d</i> (3%)                  | 5.89  |
|               |                                              | O2 (LP1) → An               | <i>s</i> (7%), <i>f</i> (86%), <i>d</i> (7%)   | 8.47  |
|               |                                              | O2 (LP1) → An               | <i>s</i> (30%), <i>f</i> (19%), <i>d</i> (51%) | 5.12  |
|               |                                              | O2 (LP1) → An               | <i>s</i> (1%), <i>f</i> (3%), <i>d</i> (96%)   | 6.56  |
|               |                                              | O2 (LP1) → An               | <i>f</i> (26%), <i>d</i> (74%)                 | 8.20  |
|               |                                              | O2 (LP3) → An               | <i>s</i> (7%), <i>f</i> (86%), <i>d</i> (7%)   | 11.73 |
|               |                                              | O2 (LP3) → An               | <i>f</i> (97%), <i>d</i> (3%)                  | 5.11  |
| O2 (LP3) → An | <i>s</i> (1%), <i>f</i> (3%), <i>d</i> (96%) | 6.90                        |                                                |       |
| dtbpy         | 85                                           | N1 → An                     | <i>s</i> (31%), <i>f</i> (5%), <i>d</i> (64%)  | 5.35  |
|               |                                              | N1 → An                     | <i>s</i> (30%), <i>f</i> (19%), <i>d</i> (51%) | 7.49  |
|               |                                              | N1 → An                     | <i>s</i> (1%), <i>f</i> (3%), <i>d</i> (96%)   | 6.21  |
|               |                                              | N2 → An                     | <i>s</i> (31%), <i>f</i> (5%), <i>d</i> (64%)  | 6.11  |
|               |                                              | N2 → An                     | <i>f</i> (97%), <i>d</i> (3%)                  | 5.00  |
|               |                                              | N2 → An                     | <i>s</i> (1%), <i>f</i> (3%), <i>d</i> (96%)   | 9.88  |

**Table S22.** Second-Order Perturbation Stabilization Energies [ $E(2)$ , kcal/mol] of Donor (D) – Acceptor (A) interactions in **3**. The total stabilization for each ligand is specified, along with the most important contributions (over 5 kcal/mol). LP = Lone pair, LV = Lone vacant.

| Ligand        | Total Stabilization Energy (kcal/mol)        | Most important interactions |                                                |       |
|---------------|----------------------------------------------|-----------------------------|------------------------------------------------|-------|
|               |                                              | D→A                         | Composition of An Orbital                      | E(2)  |
| Cl            | 138                                          | Cl1 (LP2) → An              | <i>f</i> (44%), <i>d</i> (56%)                 | 15.65 |
|               |                                              | Cl1 (LP3) → An              | <i>s</i> (41%), <i>f</i> (33%), <i>d</i> (26%) | 12.80 |
|               |                                              | Cl1 (LP3) → An              | <i>f</i> (7%), <i>d</i> (93%)                  | 7.53  |
|               |                                              | Cl1 ( $\sigma$ ) → An       | <i>s</i> (9%), <i>f</i> (72%), <i>d</i> (19%)  | 23.79 |
|               |                                              | Cl1 ( $\sigma$ ) → An       | <i>s</i> (41%), <i>f</i> (33%), <i>d</i> (26%) | 33.56 |
| ONO           | 256                                          | N → An                      | <i>s</i> (2%), <i>f</i> (88%), <i>d</i> (10%)  | 5.01  |
|               |                                              | N → An                      | <i>f</i> (7%), <i>d</i> (93%)                  | 7.76  |
|               |                                              | N → An                      | <i>s</i> (30%), <i>f</i> (5%), <i>d</i> (65%)  | 6.30  |
|               |                                              | O1 (LP1) → An               | <i>s</i> (2%), <i>f</i> (88%), <i>d</i> (10%)  | 11.52 |
|               |                                              | O1 (LP1) → An               | <i>s</i> (30%), <i>f</i> (5%), <i>d</i> (65%)  | 5.60  |
|               |                                              | O1 (LP1) → An               | <i>s</i> (10%), <i>f</i> (11%), <i>d</i> (79%) | 12.43 |
|               |                                              | O1 (LP2) → An               | <i>s</i> (2%), <i>f</i> (88%), <i>d</i> (10%)  | 7.10  |
|               |                                              | O1 (LP2) → An               | <i>f</i> (44%), <i>d</i> (56%)                 | 6.20  |
|               |                                              | O1 (LP3) → An               | <i>s</i> (2%), <i>f</i> (88%), <i>d</i> (10%)  | 7.96  |
|               |                                              | O2 (LP1) → An               | <i>s</i> (2%), <i>f</i> (88%), <i>d</i> (10%)  | 11.06 |
|               |                                              | O2 (LP1) → An               | <i>s</i> (2%), <i>f</i> (6%), <i>d</i> (92%)   | 5.29  |
|               |                                              | O2 (LP1) → An               | <i>s</i> (10%), <i>f</i> (11%), <i>d</i> (79%) | 11.78 |
|               |                                              | O2 (LP2) → An               | <i>s</i> (2%), <i>f</i> (88%), <i>d</i> (10%)  | 8.35  |
|               |                                              | O2 (LP2) → An               | <i>f</i> (44%), <i>d</i> (56%)                 | 6.31  |
|               |                                              | O2 (LP3) → An               | <i>s</i> (2%), <i>f</i> (88%), <i>d</i> (10%)  | 6.76  |
| O2 (LP3) → An | <i>s</i> (2%), <i>f</i> (6%), <i>d</i> (92%) | 8.11                        |                                                |       |
| ind           | 131                                          | C <sub>A-E</sub> → An       | <i>f</i> (96%), <i>d</i> (4%)                  | 10.98 |
|               |                                              | C <sub>B-C</sub> → An       | <i>s</i> (9%), <i>f</i> (72%), <i>d</i> (19%)  | 5.55  |
|               |                                              | C <sub>D-E</sub> → An       | <i>s</i> (30%), <i>f</i> (5%), <i>d</i> (65%)  | 6.92  |

**Table S23.** Second-Order Perturbation Stabilization Energies [ $E(2)$ , kcal/mol] of Donor (D) – Acceptor (A) interactions in **4**. The total stabilization for each ligand is specified, along with the most important contributions (over 5 kcal/mol). LP = Lone pair, LV = Lone vacant.

| Ligand | Total Stabilization Energy (kcal/mol) | Most important interactions |                                                |       |
|--------|---------------------------------------|-----------------------------|------------------------------------------------|-------|
|        |                                       | D→A                         | Composition of An Orbital                      | E(2)  |
| Cl     | 119                                   | Cl1( $\sigma$ ) → An        | <i>f</i> (60%), <i>d</i> (40%)                 | 14.89 |
|        |                                       | Cl1 (LP2) → An              | <i>s</i> (56%), <i>f</i> (10%), <i>d</i> (34%) | 38.45 |
|        |                                       | Cl1 (LP3) → An              | <i>s</i> (2%), <i>f</i> (90%), <i>d</i> (8%)   | 6.58  |
|        |                                       | Cl1 (LP3) → An              | <i>s</i> (1%), <i>f</i> (93%), <i>d</i> (6%)   | 6.02  |
|        |                                       | Cl1 (LP3) → An              | <i>s</i> (56%), <i>f</i> (10%), <i>d</i> (34%) | 7.77  |

|                       |                            |                |                            |                       |
|-----------------------|----------------------------|----------------|----------------------------|-----------------------|
|                       |                            | Cl1 (LP3) → An | $f(4\%), d(96\%)$          | 6.41                  |
| ONO                   | 269                        | N → An         | $s(2\%), f(90\%), d(8\%)$  | 6.72                  |
|                       |                            | N → An         | $f(4\%), d(96\%)$          | 6.81                  |
|                       |                            | N → An         | $s(33\%), f(3\%), d(64\%)$ | 5.82                  |
|                       |                            | O1 (LP1) → An  | $s(1\%), f(93\%), d(6\%)$  | 5.93                  |
|                       |                            | O1 (LP1) → An  | $s(5\%), f(9\%), d(86\%)$  | 9.77                  |
|                       |                            | O1 (LP2) → An  | $s(1\%), f(93\%), d(6\%)$  | 12.64                 |
|                       |                            | O1 (LP2) → An  | $f(60\%), d(40\%)$         | 9.49                  |
|                       |                            | O1 (LP3) → An  | $f(5\%), d(95\%)$          | 5.51                  |
|                       |                            | O1 (LP1) → An  | $s(1\%), f(93\%), d(6\%)$  | 5.90                  |
|                       |                            | O1 (LP1) → An  | $s(5\%), f(9\%), d(86\%)$  | 9.78                  |
|                       |                            | O1 (LP2) → An  | $s(1\%), f(93\%), d(6\%)$  | 12.33                 |
|                       |                            | O1 (LP2) → An  | $f(60\%), d(40\%)$         | 9.03                  |
|                       |                            | O1 (LP3) → An  | $f(5\%), d(95\%)$          | 6.54                  |
|                       |                            | ind            | 133                        | C <sub>A-E</sub> → An |
| C <sub>B-C</sub> → An | $f(4\%), d(96\%)$          |                |                            | 5.83                  |
| C <sub>D-E</sub> → An | $s(33\%), f(3\%), d(64\%)$ |                |                            | 5.13                  |

## 2.2 Figures

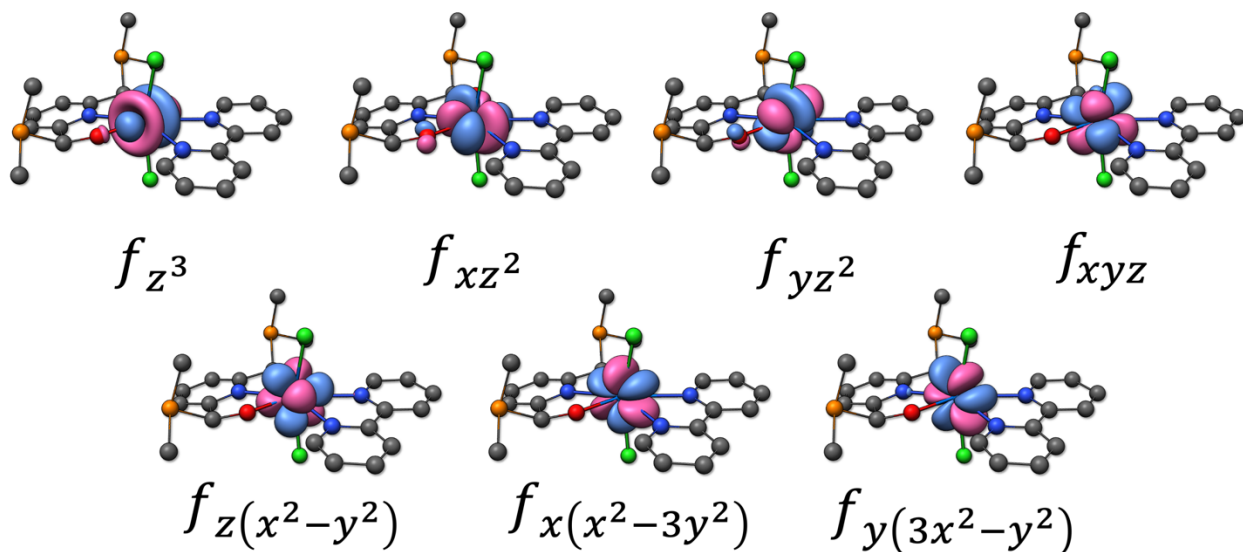

**Figure S1.** Active orbitals for **1** and **2**. The active space consisted of  $n$  electrons in 7 orbitals ( $n = 2,3$  for U, Np). Since the keyword “*actorbs forbs*” was employed in the calculation of this minimum active space, all the orbitals are  $> 99\%$   $f$  in nature. Isovalue = 0.03.

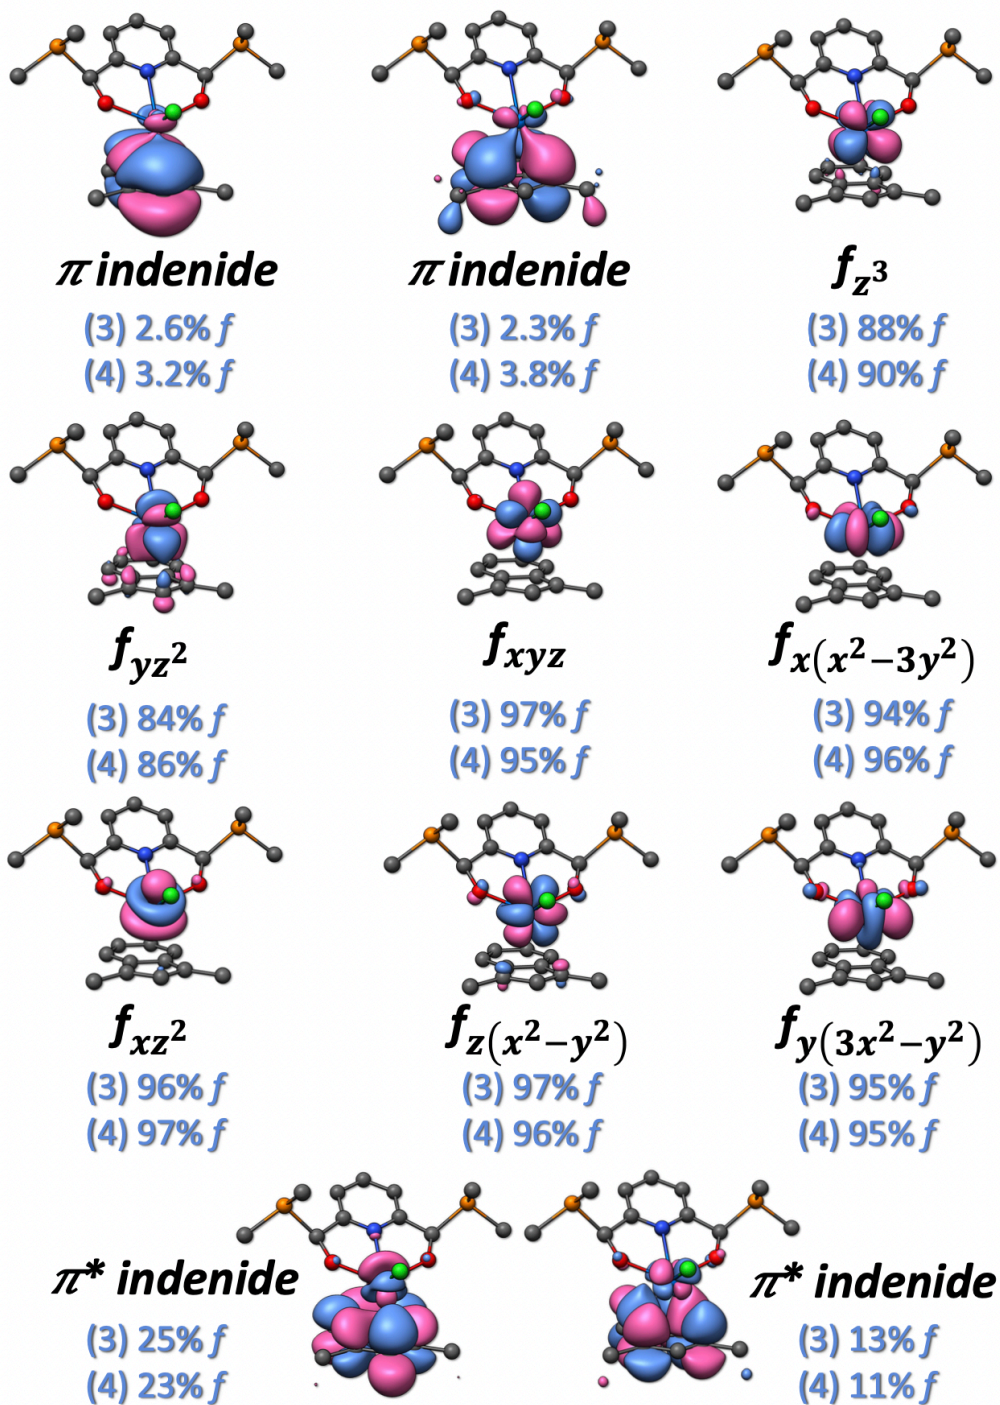

**Figure S2.** Active orbitals for **3** and **4**. The active space consisted of  $n + 2$  electrons in 11 orbitals ( $n = 2, 3$  for U, Np). Isovalue = 0.03.

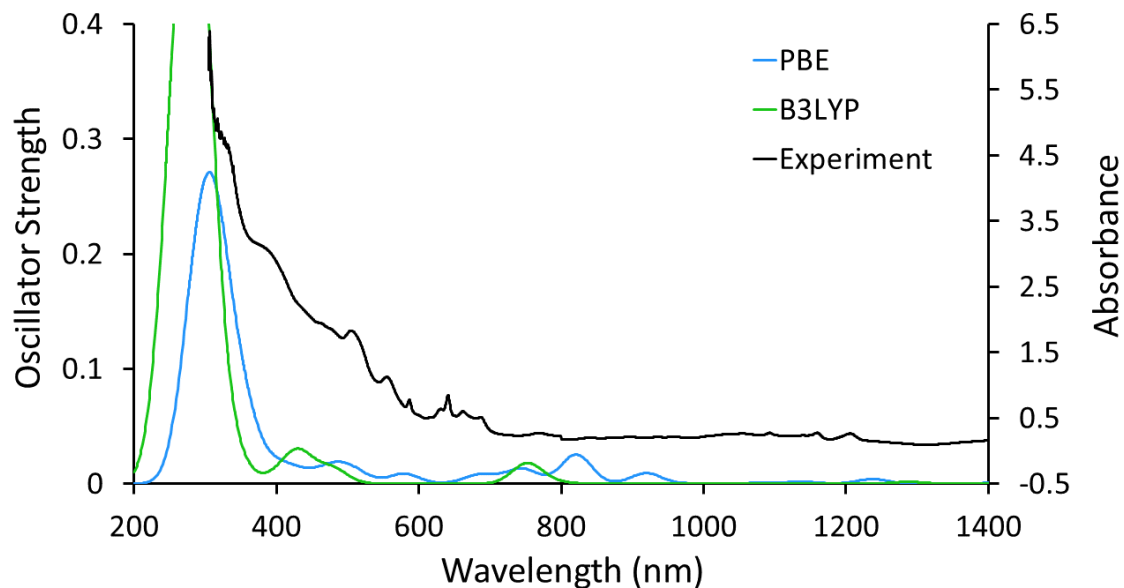

**Figure S3.** Comparison between experimental and theoretical UV/Vis/NIR spectra for **1**. The theoretical spectra were calculated using the TD-DFT approximation with the PBE and B3LYP functionals.

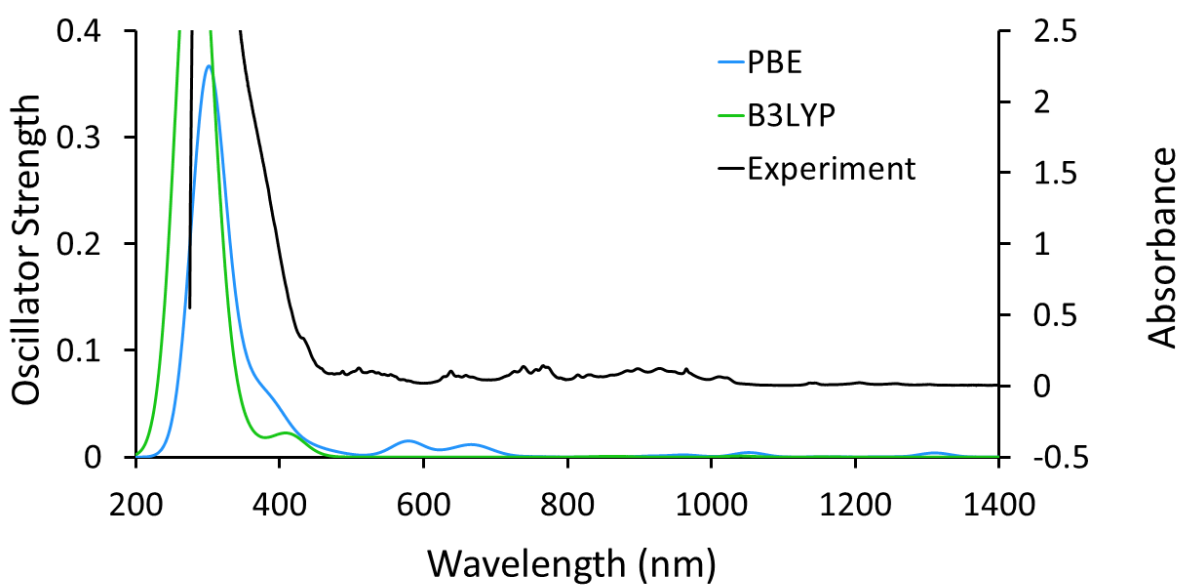

**Figure S4.** Comparison between experimental and theoretical UV/Vis/NIR spectra for **2**. The theoretical spectra were calculated using the TD-DFT approximation with the PBE and B3LYP functionals.

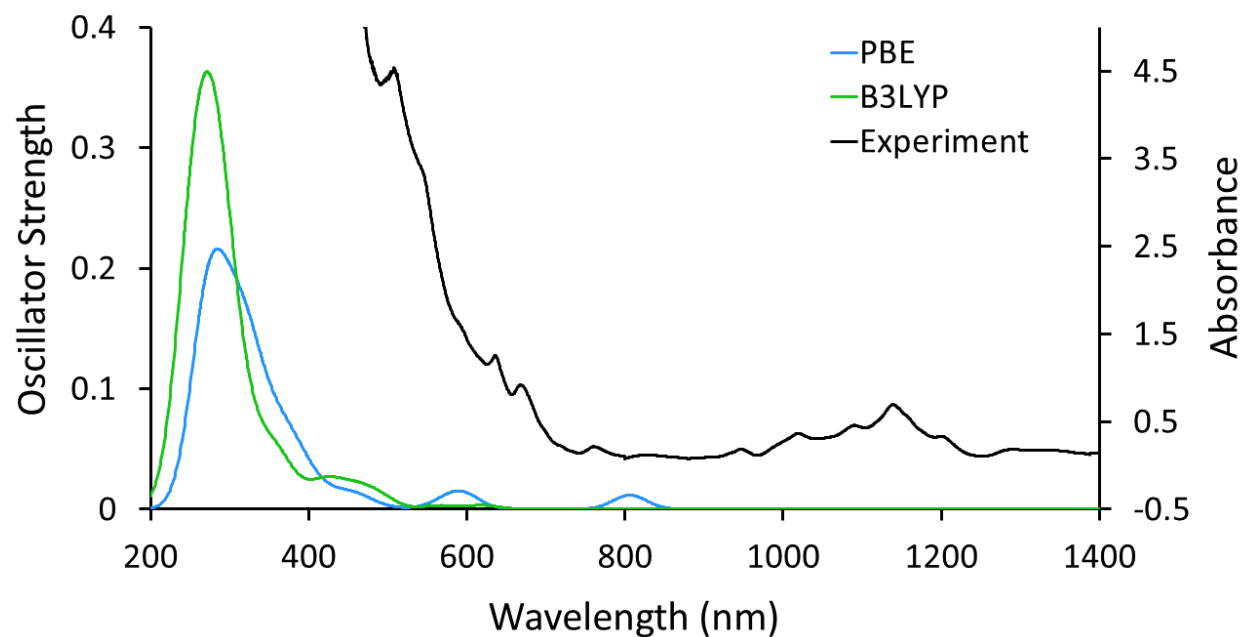

**Figure S5.** Comparison between experimental and theoretical UV/Vis/NIR spectra for **3**. The theoretical spectra were calculated using the TD-DFT approximation with the PBE and B3LYP functionals.

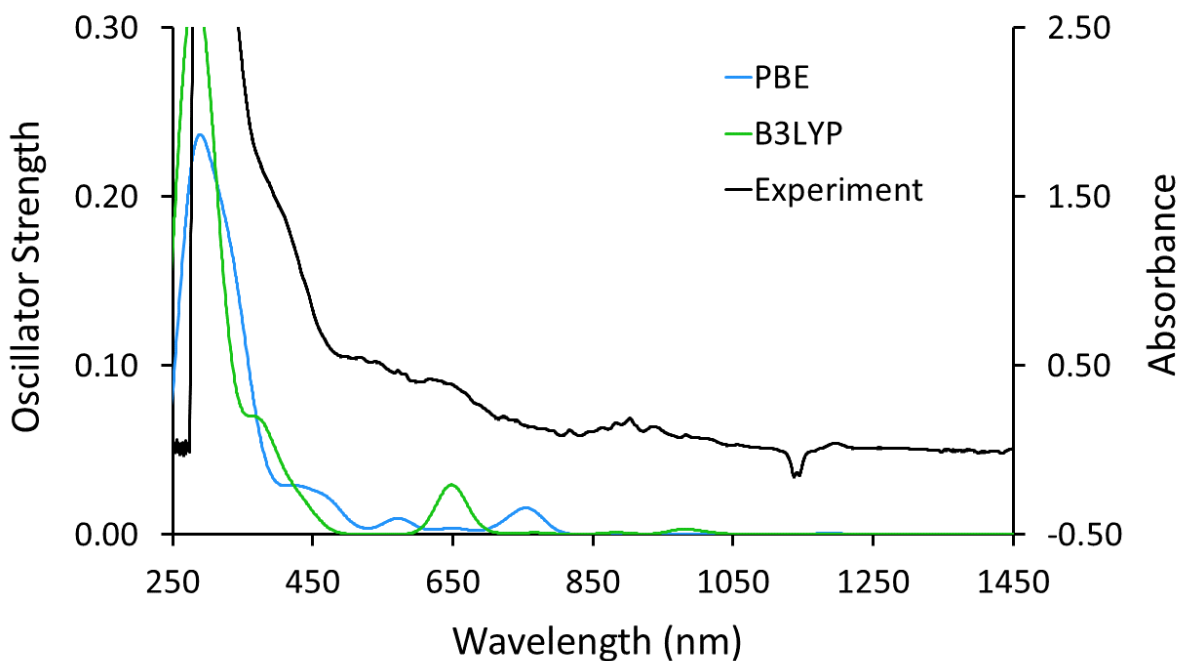

**Figure S6.** Comparison between experimental and theoretical UV/Vis/NIR spectra for **4**. The theoretical spectra were calculated using the TD-DFT approximation with the PBE and B3LYP functionals.

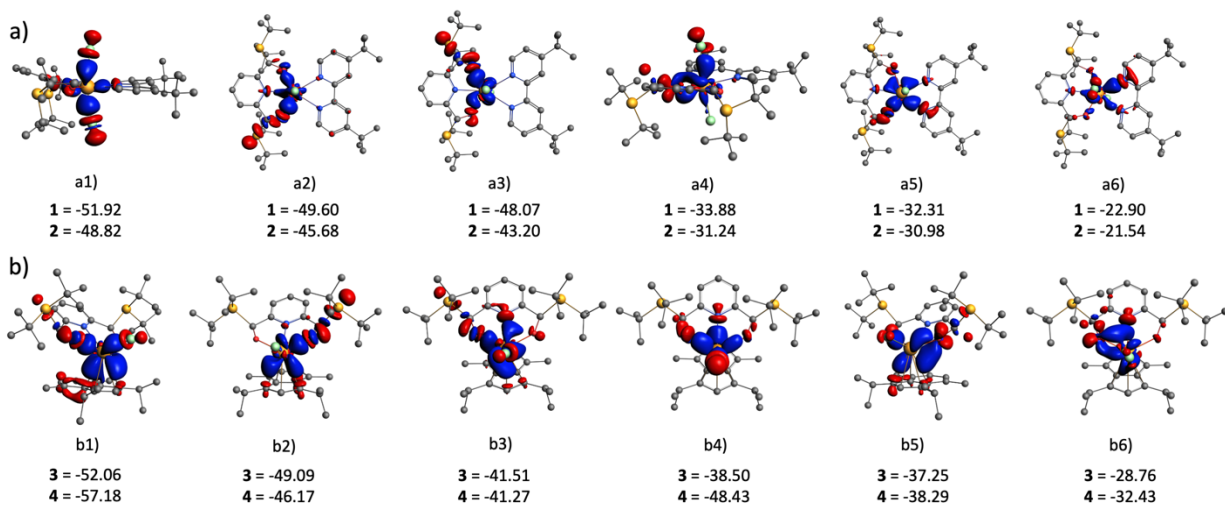

**Figure S7.** Deformation density plots from the ETS-NOCV analysis for a) dtbpy containing systems and b) indenide complexes. All the values are in kcal/mol.



### 3. Supplementary Data

#### 3.1 NMR Data

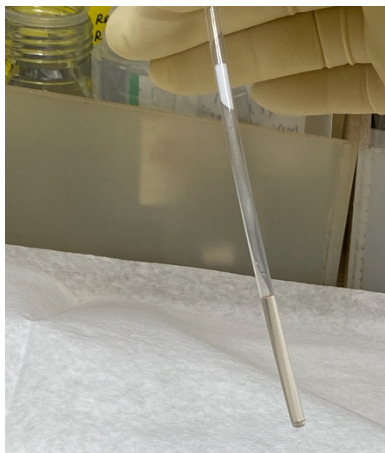

**Figure S8.** Picture of the NMR sample of  $((t\text{Bu}_2\text{P})\text{ONO})\text{NpCl}_2(\text{dtbpy})$ , **2**, taken in  $\text{C}_6\text{D}_6$ .

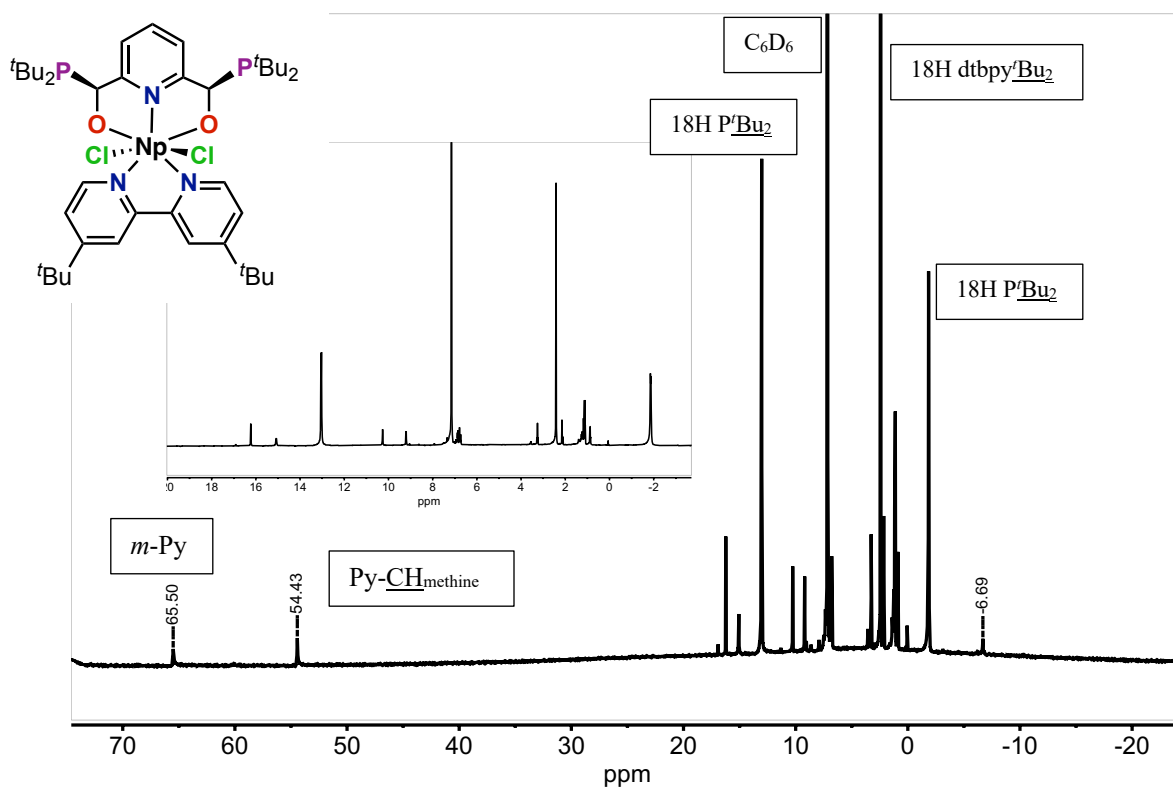

**Figure S9.**  $^1\text{H}$  NMR spectrum of  $((t\text{Bu}_2\text{P})\text{ONO})\text{NpCl}_2(\text{dtbpy})$ , **2**, obtained in  $\text{C}_6\text{D}_6$  (4.1 mM).

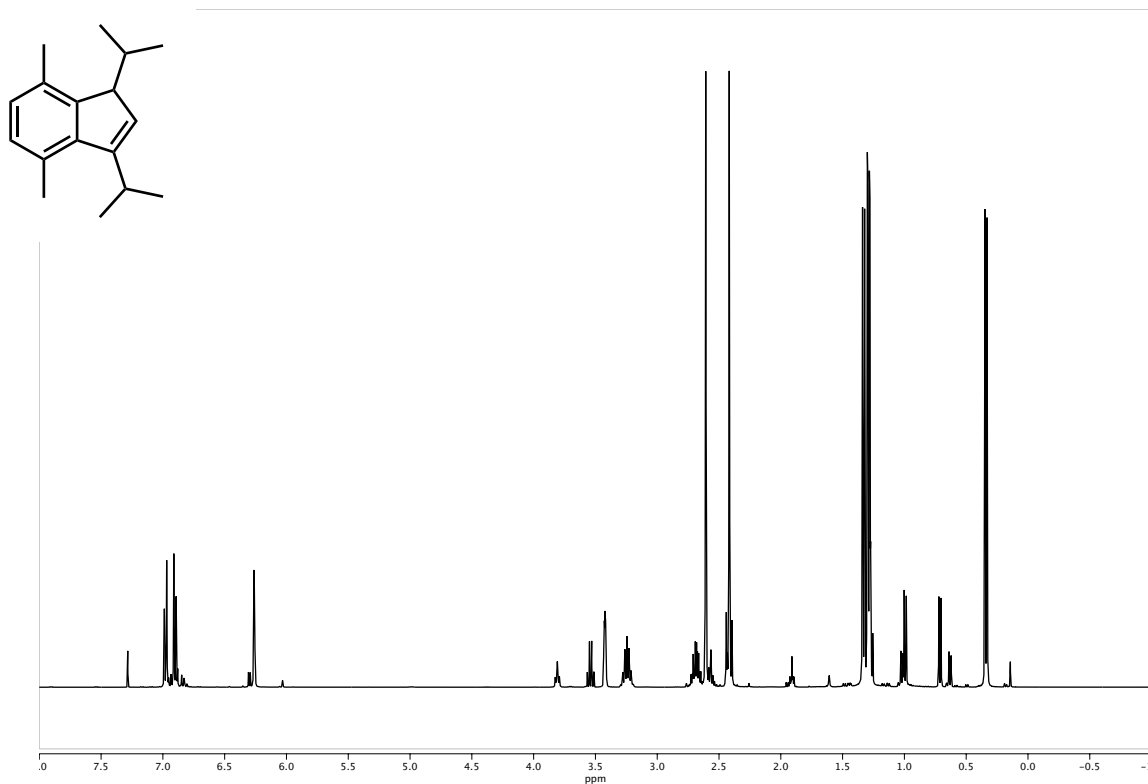

**Figure S10.**  $^1\text{H}$  NMR spectrum of 4,7-dimethyl-1,3-bis(1-methylethyl)-1*H*-indene obtained in  $\text{CDCl}_3$ . Note the multiple isomeric configurations observable by  $^1\text{H}$  NMR.

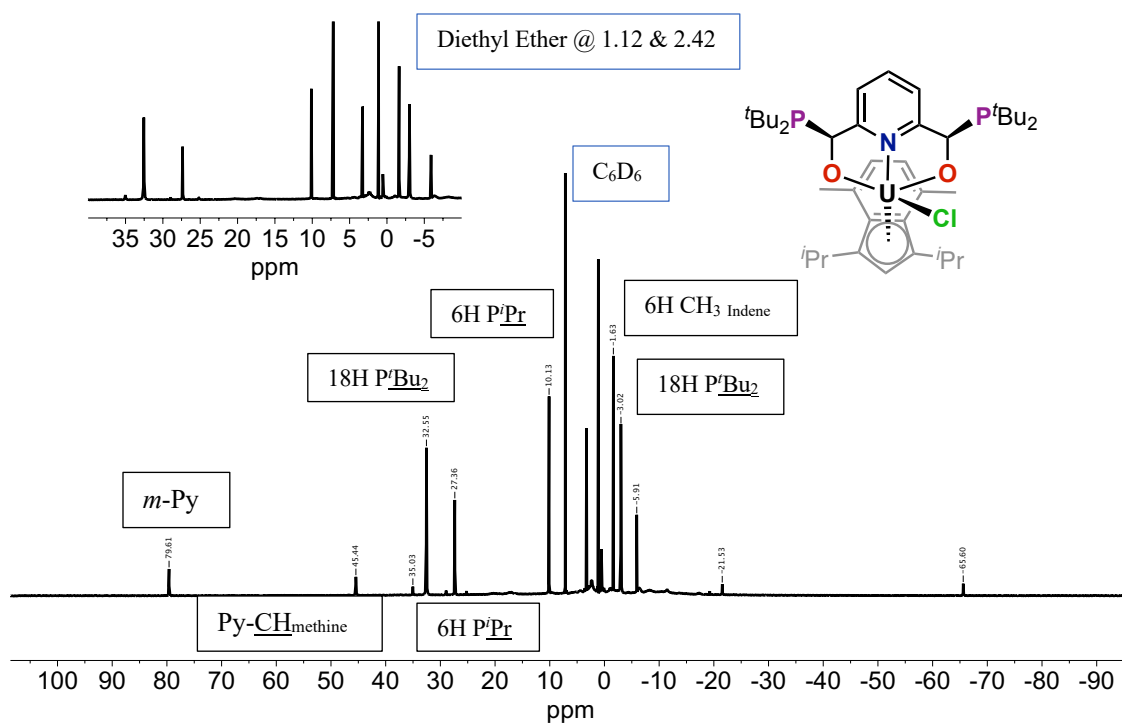

**Figure S11.**  $^1\text{H}$  NMR spectrum of  $(1,3\text{-iPr}_2\text{-}4,7\text{-Me}_2\text{-C}_9\text{H}_3)(^t\text{Bu}_2\text{P})_2\text{ONO)UCl}$ , **3**, obtained in  $\text{C}_6\text{D}_6$ .

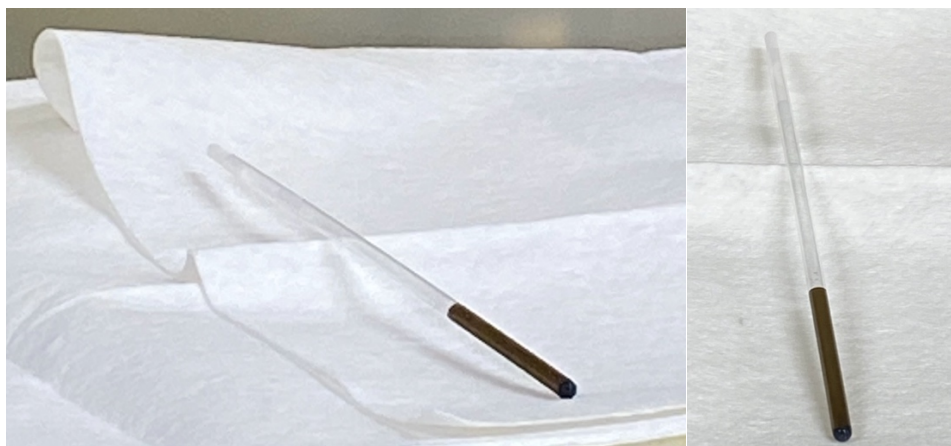

**Figure S12.** Pictures of the NMR sample of  $(1,3\text{-iPr}_2\text{-4,7-Me}_2\text{-C}_9\text{H}_3)(^t\text{Bu}_2\text{P})\text{ONO})\text{NpCl}$ , **4**, taken in  $\text{C}_6\text{D}_6$ .

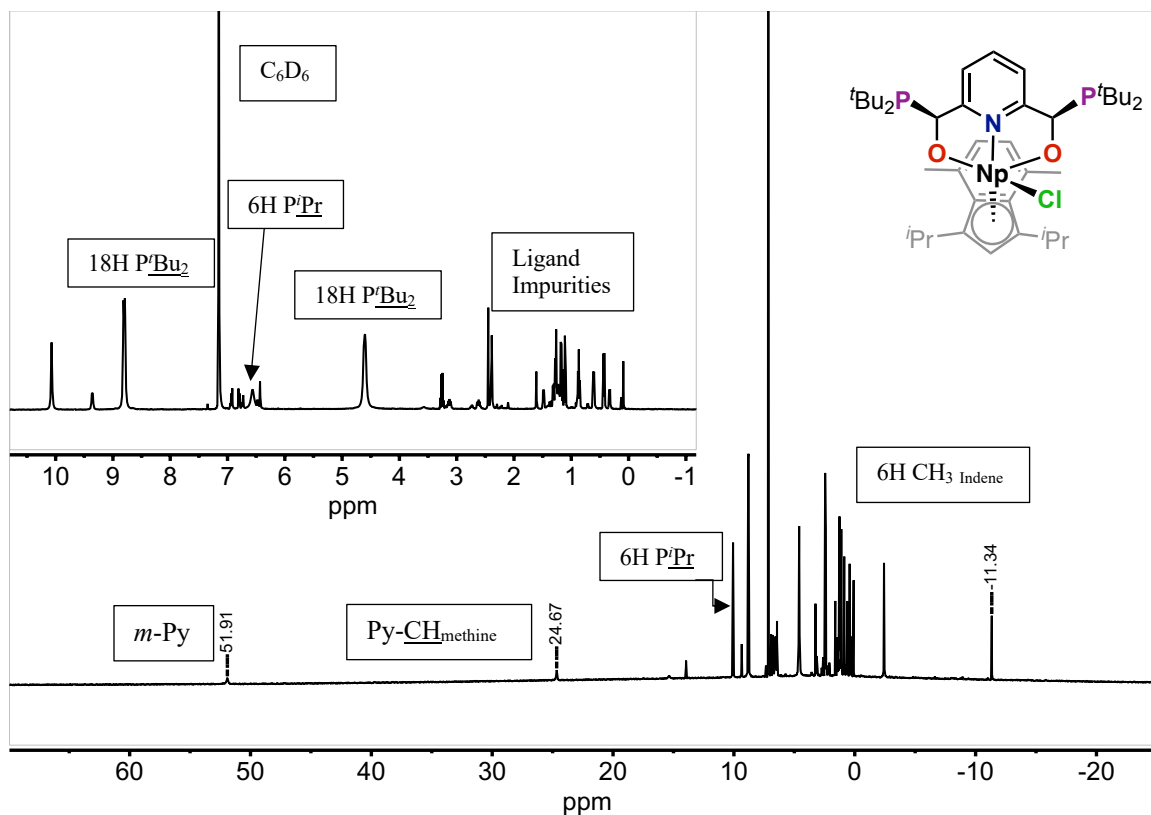

**Figure S13.**  $^1\text{H}$  NMR spectrum of  $(1,3\text{-iPr}_2\text{-4,7-Me}_2\text{-C}_9\text{H}_3)(^t\text{Bu}_2\text{P})\text{ONO})\text{NpCl}$ , **4**, obtained in  $\text{C}_6\text{D}_6$  (5.5 mM).

**Table S24.** Comparison of  $^{31}\text{P}$  NMR resonances.

| Complex                                                                                                           | NMR Shift ( $\delta$ , ppm) | Ref.      |
|-------------------------------------------------------------------------------------------------------------------|-----------------------------|-----------|
| $(^t\text{Bu}_2\text{P})\text{ONO})\text{UCl}_2(\text{dtbpy})$ , <b>1</b>                                         | 86.0                        | 4         |
| $(^t\text{Bu}_2\text{P})\text{ONO})\text{NpCl}_2(\text{dtbpy})$ , <b>2</b>                                        | 79.3                        | This work |
| $(1,3\text{-iPr}_2\text{-4,7-Me}_2\text{-C}_9\text{H}_3)(^t\text{Bu}_2\text{P})\text{ONO})\text{UCl}$ , <b>3</b>  | 81.8                        | This work |
| $(1,3\text{-iPr}_2\text{-4,7-Me}_2\text{-C}_9\text{H}_3)(^t\text{Bu}_2\text{P})\text{ONO})\text{NpCl}$ , <b>4</b> | 72.7                        | This work |

### 3.2 UV/Vis/NIR Data

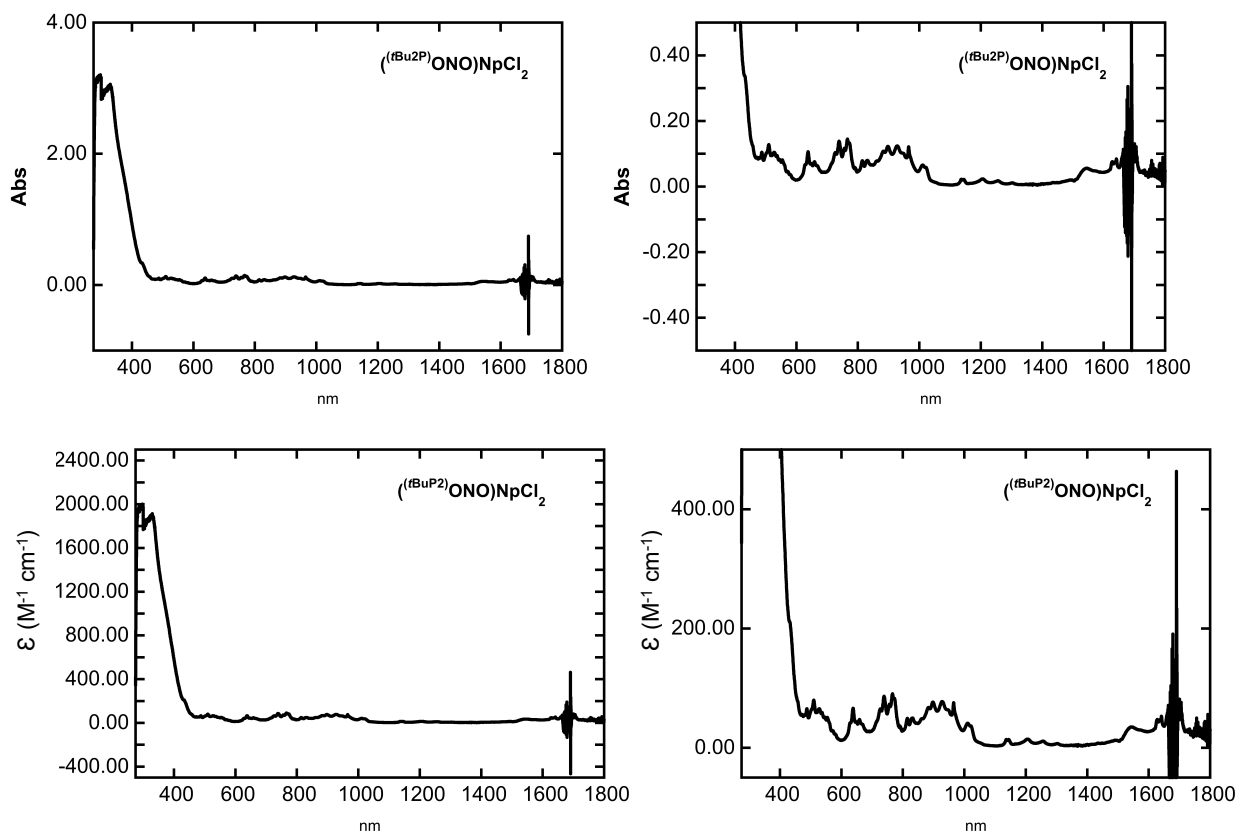

**Figure S14.** UV/Vis/NIR spectrum of  $(t\text{Bu}^2\text{P})\text{ONO})\text{NpCl}_2(\text{dtbpy})$ , **2**, taken in  $\text{C}_6\text{H}_6:\text{C}_6\text{D}_6$  60:40 (1.6 mM) in absorbance (top) and molar absorptivity (bottom).

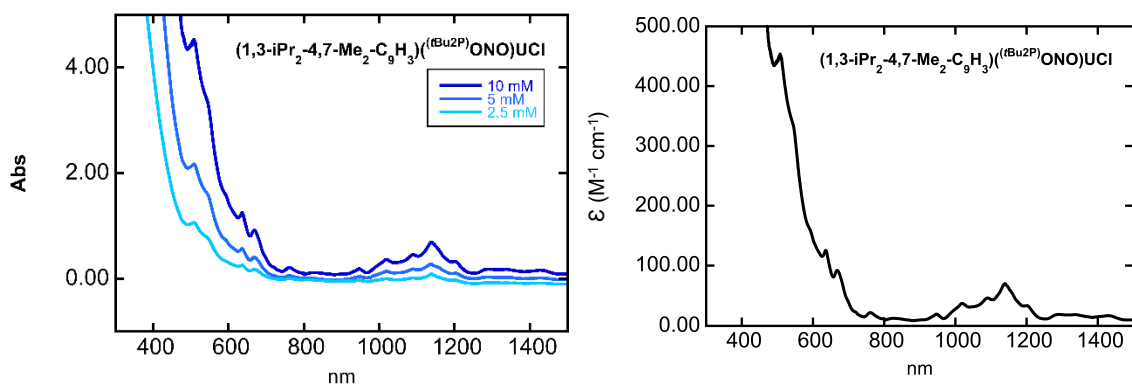

**Figure S15.** UV/Vis/NIR spectrum of  $(1,3\text{-iPr}_2\text{-}4,7\text{-Me}_2\text{-C}_9\text{H}_3)(t\text{Bu}^2\text{P})\text{ONO})\text{UCI}$ , **3**, in toluene at varying concentrations in absorbance (left) and molar absorptivity (right).

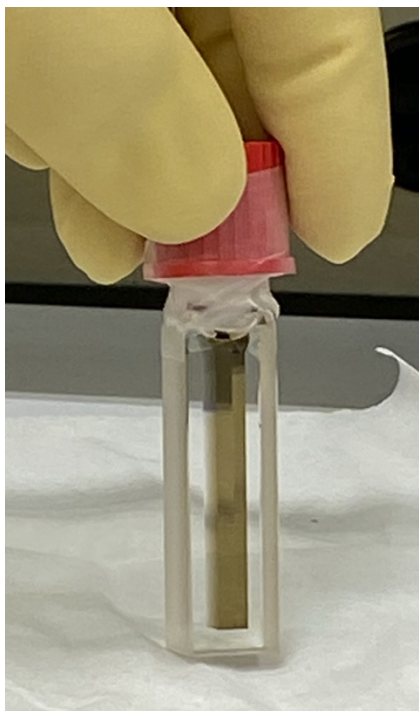

**Figure S16.** Picture of the UV/Vis/NIR sample of  $(1,3\text{-iPr}_2\text{-4,7-Me}_2\text{-C}_9\text{H}_3)(^t\text{Bu}_2\text{P})\text{ONO})\text{NpCl}$ , **4**, taken in  $\text{C}_6\text{H}_6\text{:C}_6\text{D}_6$  60:40 (1.2 mM).

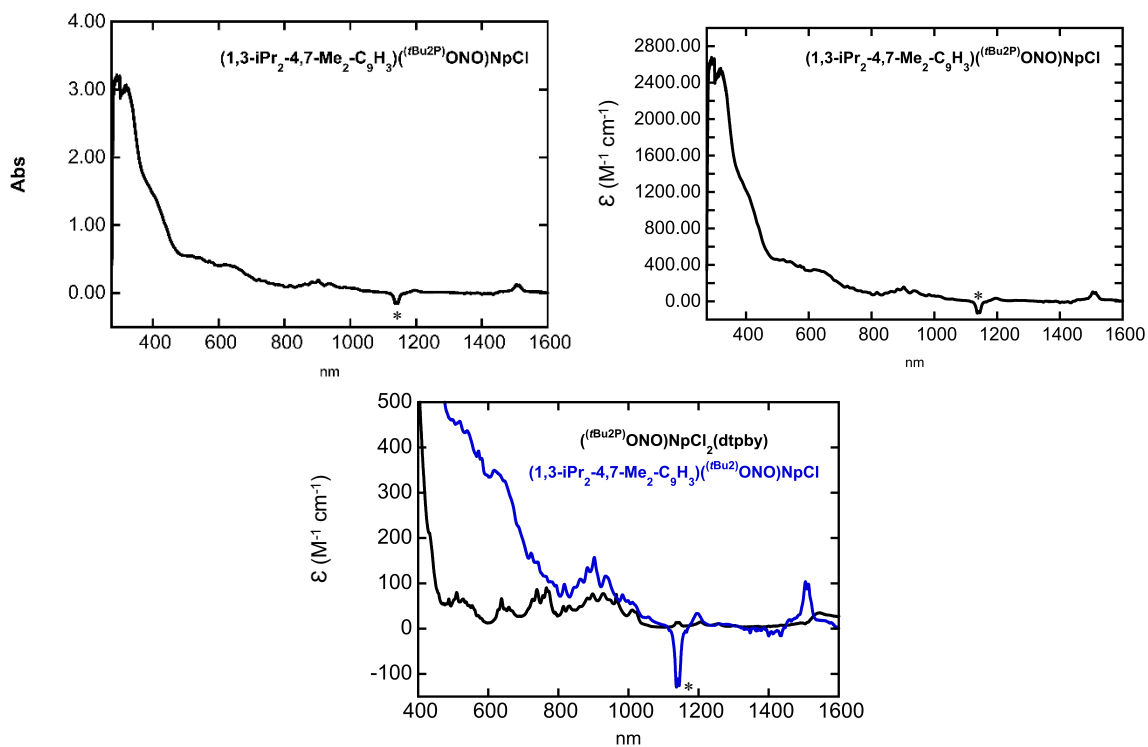

**Figure S17.** UV/Vis/NIR Spectrum of  $(1,3\text{-iPr}_2\text{-4,7-Me}_2\text{-C}_9\text{H}_3)(^t\text{Bu}_2\text{P})\text{ONO})\text{NpCl}$ , **4**, taken in  $\text{C}_6\text{H}_6\text{:C}_6\text{D}_6$  60:40 (1.2 mM) in absorbance (top left) and molar absorptivity (top right). Bottom is a comparison between complexes **2** and **4**. \*Indicates a known artefact of the instrument.

### 3.3 Pictures of Reactions and Crystalline Material of 1 and 4

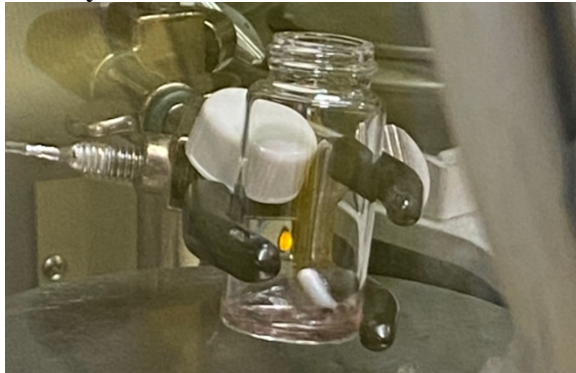

**Figure S18.** The mixture of  $(dme)_2NpCl_4$  and 2,6-pyridine dicarboxaldehyde in THF results in a pale pink solution.

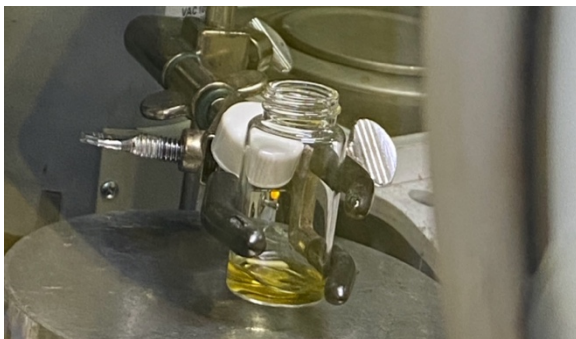

**Figure S19.** The addition of  $tBu_2PSiMe_3$  (2 equiv) to the pink solution shown in **Figure S18** results in an immediately color change to bright yellow.

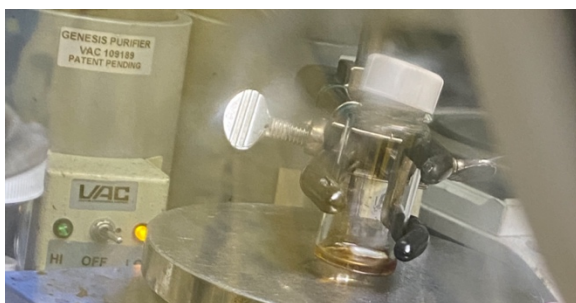

**Figure S20.** The resulting yellow powder from **Figure S19** was resuspended in fluorobenzene. The addition of dtbpy to this mixture results in a color change to peach, and from this solution crystalline material was collected (**Figure S21**).

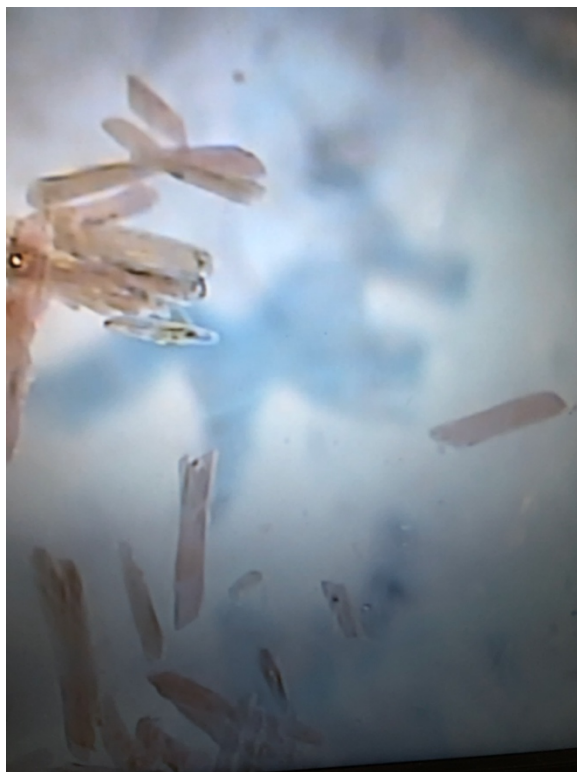

**Figure S21.** Pale peach crystals of  $({}^t\text{Bu}^{2\text{P}}\text{ONO})\text{NpCl}_2(\text{dtbpy})$ , **2**.

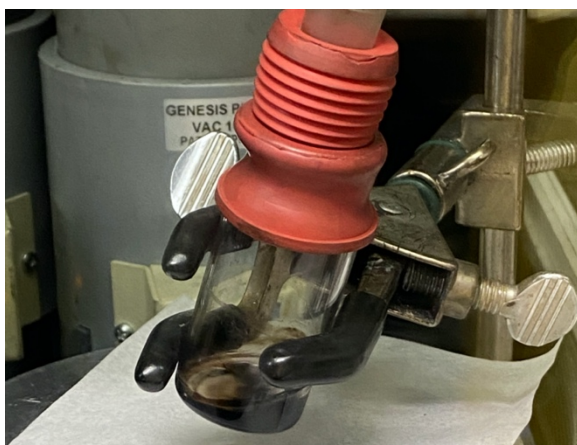

**Figure S22.** The initial steps in the synthesis of  $(1,3\text{-iPr}_2\text{-}4,7\text{-Me}_2\text{-C}_9\text{H}_3)({}^t\text{Bu}^{2\text{P}}\text{ONO})\text{NpCl}$ , **4**, are reminiscent of the reactions observed in **Figures S18, S19**. The addition of in-situ deprotonated  $1,3\text{-iPr}_2\text{-}4,7\text{-Me}_2\text{-C}_9\text{H}_3$  (using (trimethylsilyl)methyl sodium ( $\text{Na-CH}_2\text{Si}(\text{Me})_3$ )) to this yellow solution results in the formation of a dark solution.



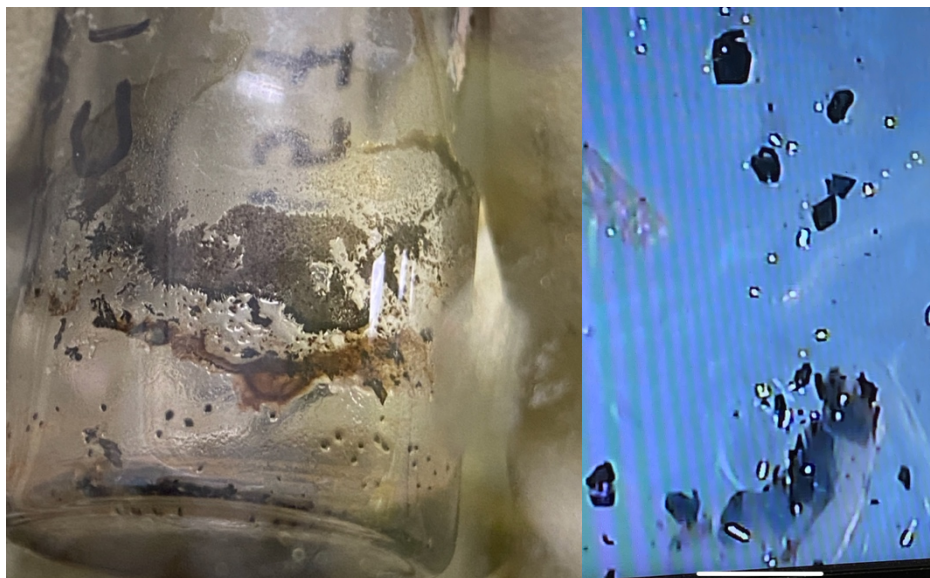

**Figure S23.** Dark crystalline material  $(1,3\text{-iPr}_2\text{-}4,7\text{-Me}_2\text{-C}_9\text{H}_3)(\text{tBu}_2\text{P})\text{ONO})\text{NpCl}$ , **4**, observed in a vial (left) and under a microscope (right).



## 4. Isolation of an Intermediate Product

Care must be taken to allow sufficient time for TMS-Cl generation and An-O bond formation to occur. An intermediate complex arising from incomplete formation of (*t*Bu<sup>2</sup>P)ONO forms, giving products from the loss of a single TMS-Cl. This intermediate was identified by SC-XRD as (<sup>OTMS</sup>PNO<sup>*t*Bu</sup>)UCl<sub>2</sub>(η<sup>5</sup>-C<sub>9</sub>H<sub>3</sub>-1,3-(*i*Pr<sub>2</sub>)-4,7-Me<sub>2</sub>) (**3b**, **Figure S24**, (<sup>OTMS</sup>PNO<sup>*t*Bu</sup>) = 2-((trimethylsiloxy)(*tert*-butylphosphino)-methyl-6-((*tert*-butylphosphino-methanolato)pyridine)). Complex **3b** is reminiscent of the previously reported (<sup>OTMS</sup>PNO<sup>*t*Bu</sup>)UCl<sub>3</sub>(dtbpy),<sup>4</sup> and is a rational intermediate in the formation of **3**. Efforts to isolate the pure complex of **3b** were unsuccessful as the isolation of this complex under normal reaction conditions was inconsistent. Further experiments to independently isolate **3b** led to the isolation of **3** instead. Due to this conditions, further characterization of **3b** beyond SC-XRD was not possible. The change in supporting ligand (indenide vs dtbpy) does not drastically alter the bond lengths and angles between **3b** and (<sup>OTMS</sup>PNO<sup>*t*Bu</sup>)UCl<sub>3</sub>(dtbpy) (**Table S25**), suggesting the change in supporting ligand does not significantly affect the electronic structure of these complexes. However, the intermediate, **3b**, has contracted U-O bonds distances and elongated U-N<sub>pyr</sub> and U-centroid bond distances when compared to **3**. As **3b** cannot be isolated consistently, focus was then shifted to adapting this chemistry to neptunium.

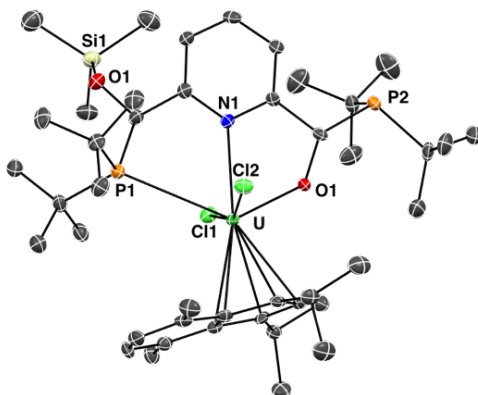

**Figure S24.** Solid-state structure of **3b**, a likely intermediate in the formation of **3**, presented at 50% probability ellipsoids.

**Table S25. Select shared bond distances (Å) and angles (°) for  $(^{OTMS})PNO^{tBu}UCl_2(\eta^5-C_9H_3-1,3-(iPr_2)-4,7-Me_2)$  in comparison to  $(^{OTMS})PNO^{tBu}U-Cl_3(dtbpv)$ .<sup>4</sup>**

| Å, ∠ (°)                    | $(^{OTMS})PNO^{tBu}U-Cl_3(dtbpv)$ <sup>4</sup> | $(^{OTMS})PNO^{tBu}UCl_2(\eta^5-C_9H_3-1,3-(iPr_2)-4,7-Me_2)$ (3b) |
|-----------------------------|------------------------------------------------|--------------------------------------------------------------------|
| <b>U-O1</b>                 | 2.069(5)                                       | 2.081(3)                                                           |
| <b>U-P1</b>                 | 3.220(3)                                       | 3.257(2)                                                           |
| <b>U-Cl1</b>                | 2.658(3)                                       | 2.646(2)                                                           |
| <b>U-Cl2</b>                | 2.663(3)                                       | 2.629(2)                                                           |
| <b>U-N<sub>pyr</sub></b>    | 2.648(6)                                       | 2.571(3)                                                           |
| <b>U-Centroid</b>           | N/A                                            | 2.501                                                              |
| <b>Cl1-U-Cl2</b>            | 144.21(6)                                      | 157.08(3)                                                          |
| <b>O1-U-P1</b>              | 127.46(14)                                     | 131.10(8)                                                          |
| <b>N<sub>pyr</sub>-U-O1</b> | 64.82(18)                                      | 66.25(11)                                                          |
| <b>N<sub>pyr</sub>-U-P1</b> | 62.92(13)                                      | 64.87(8)                                                           |

## 5. Single Crystal X-ray Diffraction Data

### 5.1 CCDC Deposition, 2297381-2297385.

$(^{t\text{Bu}2\text{P}}\text{ONO})\text{UCl}_2(\text{dtbpy})$ , **1**, (*P*-1 unit cell): 2297381

$(^{t\text{Bu}2\text{P}}\text{ONO})\text{NpCl}_2(\text{dtbpy})$ , **2**: 2297382

$(1,3\text{-iPr}_2\text{-}4,7\text{-Me}_2\text{-C}_9\text{H}_3)(^{t\text{Bu}2\text{P}}\text{ONO})\text{UCl}$ , **3**: 2297383

$(^{\text{OTMS}}\text{PNO}^{t\text{Bu}})\text{UCl}_2(\eta^5\text{-C}_9\text{H}_3\text{-}1,3\text{-(CHMe}_2)_2\text{-}4,7\text{-Me}_2)$ , **3b**: 2297384

$(1,3\text{-iPr}_2\text{-}4,7\text{-Me}_2\text{-C}_9\text{H}_3)(^{t\text{Bu}2\text{P}}\text{ONO})\text{NpCl}$ , **4**: 2297385

## 5.2 Crystallography Tables: Refinement Details, Bond Distances (Å), and Angles (°)

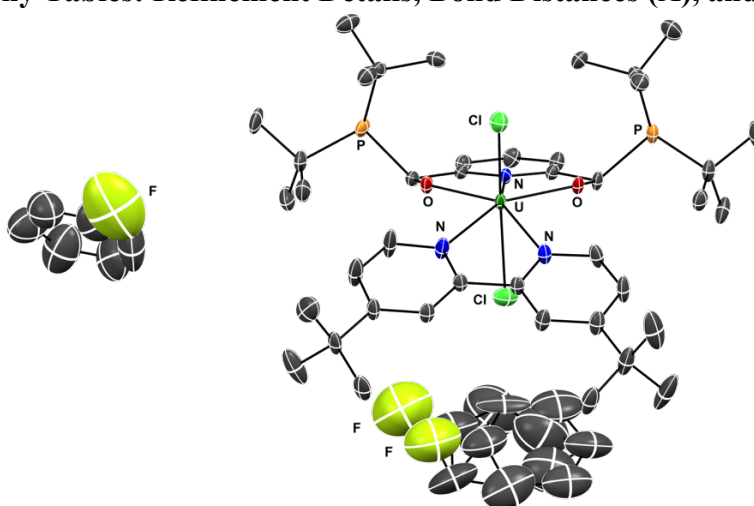

Figure S25. Crystal structure of  $(t\text{Bu}_2\text{P})\text{ONO})\text{UCl}_2(\text{dtbp})$ , **1**, (P-1 unit cell).

Table S26. Crystal data and structure refinement for  $(t\text{Bu}_2\text{P})\text{ONO})\text{UCl}_2(\text{dtbp})$ , **1**.

| Identification code                            | <b>mesoONOUBPYC12</b>                                                                   |
|------------------------------------------------|-----------------------------------------------------------------------------------------|
| Empirical formula                              | $\text{C}_{53}\text{H}_{75}\text{Cl}_2\text{F}_2\text{N}_3\text{O}_2\text{P}_2\text{U}$ |
| Formula weight                                 | 1195.03                                                                                 |
| Temperature/K                                  | 101.00                                                                                  |
| Crystal system                                 | triclinic                                                                               |
| Space group                                    | P-1                                                                                     |
| a/Å                                            | 14.7477(5)                                                                              |
| b/Å                                            | 14.9676(5)                                                                              |
| c/Å                                            | 15.9026(5)                                                                              |
| $\alpha/^\circ$                                | 76.1970(10)                                                                             |
| $\beta/^\circ$                                 | 69.6960(10)                                                                             |
| $\gamma/^\circ$                                | 73.7070(10)                                                                             |
| Volume/Å <sup>3</sup>                          | 3120.84(18)                                                                             |
| Z                                              | 2                                                                                       |
| $\rho_{\text{calc}}/\text{g/cm}^3$             | 1.272                                                                                   |
| $\mu/\text{mm}^{-1}$                           | 2.779                                                                                   |
| F(000)                                         | 1208.0                                                                                  |
| Crystal size/mm <sup>3</sup>                   | 0.22 × 0.17 × 0.14                                                                      |
| Radiation                                      | MoK $\alpha$ ( $\lambda = 0.71073$ )                                                    |
| 2 $\theta$ range for data collection/ $^\circ$ | 4.286 to 52.044                                                                         |
| Index ranges                                   | $-18 \leq h \leq 18, -18 \leq k \leq 18, -19 \leq l \leq 19$                            |
| Reflections collected                          | 43106                                                                                   |
| Independent reflections                        | 12283 [ $R_{\text{int}} = 0.0353, R_{\text{sigma}} = 0.0345$ ]                          |
| Data/restraints/parameters                     | 12283/240/619                                                                           |
| Goodness-of-fit on F <sup>2</sup>              | 1.106                                                                                   |
| Final R indexes [ $I \geq 2\sigma(I)$ ]        | $R_1 = 0.0356, wR_2 = 0.0848$                                                           |
| Final R indexes [all data]                     | $R_1 = 0.0395, wR_2 = 0.0861$                                                           |
| Largest diff. peak/hole / e Å <sup>-3</sup>    | 2.00/-0.95                                                                              |

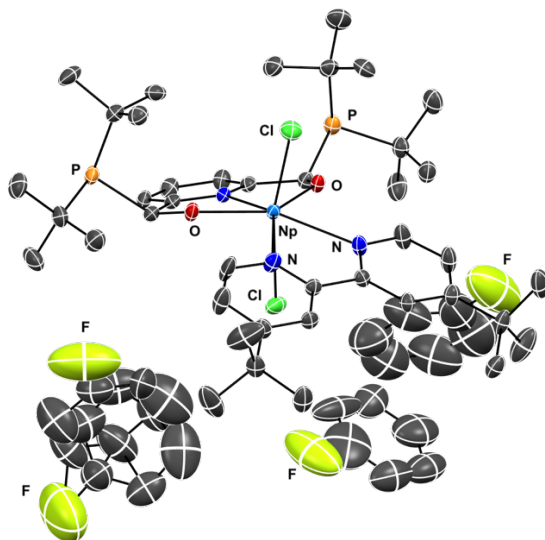

**Figure S26.** Crystal structure of  $(^{t\text{Bu}2\text{P}}\text{ONO})\text{NpCl}_2(\text{dtbp})$ , **2**.

**Table S27.** Crystal data and structure refinement for  $(^{t\text{Bu}2\text{P}}\text{ONO})\text{NpCl}_2(\text{dtbp})$ , **2**.

| Identification code                                                       | <b>NpTempint2</b>                                                                 |
|---------------------------------------------------------------------------|-----------------------------------------------------------------------------------|
| <b>Empirical formula</b>                                                  | $\text{C}_{59}\text{H}_{80}\text{Cl}_2\text{F}_2\text{N}_3\text{NpO}_2\text{P}_2$ |
| <b>Formula weight</b>                                                     | 1271.10                                                                           |
| <b>Temperature/K</b>                                                      | 100.0                                                                             |
| <b>Crystal system</b>                                                     | triclinic                                                                         |
| <b>Space group</b>                                                        | P-1                                                                               |
| <b>a/Å</b>                                                                | 14.7455(19)                                                                       |
| <b>b/Å</b>                                                                | 15.1440(18)                                                                       |
| <b>c/Å</b>                                                                | 15.9601(18)                                                                       |
| <b><math>\alpha/^\circ</math></b>                                         | 76.118(6)                                                                         |
| <b><math>\beta/^\circ</math></b>                                          | 69.493(6)                                                                         |
| <b><math>\gamma/^\circ</math></b>                                         | 72.912(6)                                                                         |
| <b>Volume/Å<sup>3</sup></b>                                               | 3153.2(7)                                                                         |
| <b>Z</b>                                                                  | 2                                                                                 |
| <b><math>\rho_{\text{calc}}/\text{g}/\text{cm}^3</math></b>               | 1.339                                                                             |
| <b><math>\mu/\text{mm}^{-1}</math></b>                                    | 1.829                                                                             |
| <b>F(000)</b>                                                             | 1292.0                                                                            |
| <b>Crystal size/mm<sup>3</sup></b>                                        | 0.31 × 0.2 × 0.09                                                                 |
| <b>Radiation</b>                                                          | MoK $\alpha$ ( $\lambda = 0.71073$ )                                              |
| <b>2<math>\theta</math> range for data collection/<math>^\circ</math></b> | 4.256 to 53.464                                                                   |
| <b>Index ranges</b>                                                       | $-15 \leq h \leq 18, -17 \leq k \leq 19, -19 \leq l \leq 20$                      |
| <b>Reflections collected</b>                                              | 35734                                                                             |
| <b>Independent reflections</b>                                            | 13247 [ $R_{\text{int}} = 0.0414, R_{\text{sigma}} = 0.0475$ ]                    |
| <b>Data/restraints/parameters</b>                                         | 13247/156/674                                                                     |
| <b>Goodness-of-fit on F<sup>2</sup></b>                                   | 1.100                                                                             |
| <b>Final R indexes [<math>I \geq 2\sigma(I)</math>]</b>                   | $R_1 = 0.0420, wR_2 = 0.1075$                                                     |
| <b>Final R indexes [all data]</b>                                         | $R_1 = 0.0481, wR_2 = 0.1097$                                                     |
| <b>Largest diff. peak/hole / e Å<sup>-3</sup></b>                         | 1.85/-1.48                                                                        |

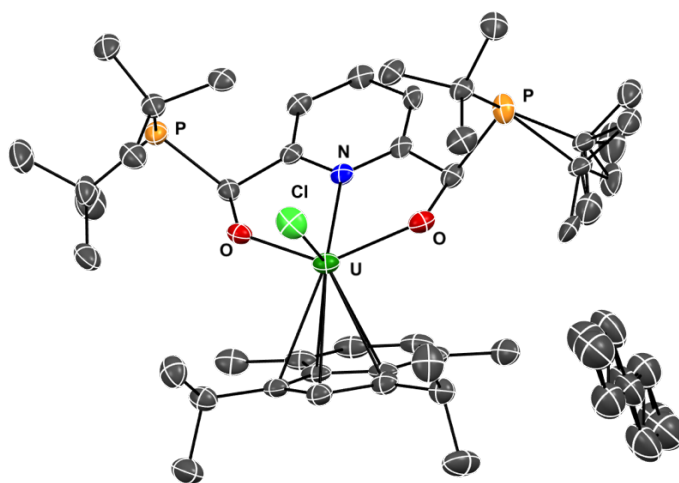

**Figure S27.** Crystal structure of  $(1,3\text{-iPr}_2\text{-4,7-Me}_2\text{-C}_9\text{H}_3)((t\text{Bu}_2\text{P})\text{ONO})\text{UCl}$ , **3**.

**Table S28.** Crystal data and structure refinement for  $(1,3\text{-iPr}_2\text{-4,7-Me}_2\text{-C}_9\text{H}_3)((t\text{Bu}_2\text{P})\text{ONO})\text{UCl}$ , **3**.

| Identification code                           | <b>mesoONOUIndCl</b>                                                             |
|-----------------------------------------------|----------------------------------------------------------------------------------|
| Empirical formula                             | $\text{C}_{85}\text{H}_{140}\text{Cl}_2\text{N}_2\text{O}_4\text{P}_4\text{U}_2$ |
| Formula weight                                | 1924.82                                                                          |
| Temperature/K                                 | 100.00                                                                           |
| Crystal system                                | monoclinic                                                                       |
| Space group                                   | $\text{P}2_1/\text{n}$                                                           |
| $a/\text{\AA}$                                | 14.5847(9)                                                                       |
| $b/\text{\AA}$                                | 15.9526(9)                                                                       |
| $c/\text{\AA}$                                | 20.0810(12)                                                                      |
| $\alpha/^\circ$                               | 90                                                                               |
| $\beta/^\circ$                                | 107.634(4)                                                                       |
| $\gamma/^\circ$                               | 90                                                                               |
| Volume/ $\text{\AA}^3$                        | 4452.6(5)                                                                        |
| $Z$                                           | 2                                                                                |
| $\rho_{\text{calc}}/\text{g cm}^{-3}$         | 1.436                                                                            |
| $\mu/\text{mm}^{-1}$                          | 3.810                                                                            |
| $F(000)$                                      | 1948.0                                                                           |
| Crystal size/ $\text{mm}^3$                   | $0.15 \times 0.15 \times 0.1$                                                    |
| Radiation                                     | $\text{MoK}\alpha$ ( $\lambda = 0.71073$ )                                       |
| $2\theta$ range for data collection/ $^\circ$ | 3.982 to 55.4                                                                    |
| Index ranges                                  | $-15 \leq h \leq 18, -20 \leq k \leq 20, -26 \leq l \leq 26$                     |
| Reflections collected                         | 48044                                                                            |
| Independent reflections                       | 10273 [ $R_{\text{int}} = 0.0847, R_{\text{sigma}} = 0.0640$ ]                   |
| Data/restraints/parameters                    | 10273/9/515                                                                      |
| Goodness-of-fit on $F^2$                      | 1.016                                                                            |
| Final R indexes [ $I \geq 2\sigma(I)$ ]       | $R_1 = 0.0362, wR_2 = 0.0781$                                                    |
| Final R indexes [all data]                    | $R_1 = 0.0681, wR_2 = 0.0877$                                                    |
| Largest diff. peak/hole / $e \text{\AA}^{-3}$ | 2.52/-1.03                                                                       |

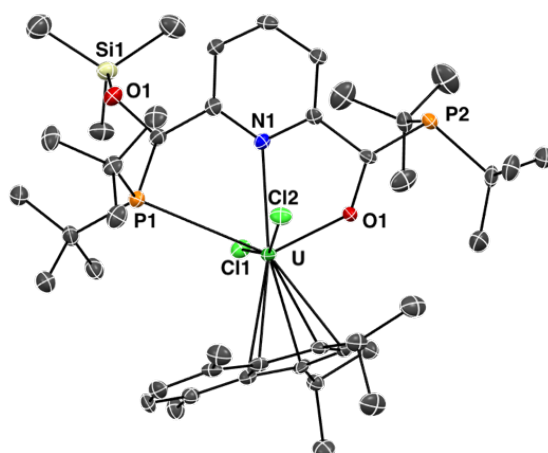

**Figure S28.** Crystal structure of  $(^{(OTMS)PNO}tBu)UCl_2(\eta^5-C_9H_3-1,3-(CHMe_2)_2-4,7-Me_2)$ , **3b**.

**Table S29.** Crystal data and structure refinement for  $(^{(OTMS)PNO}tBu)UCl_2(\eta^5-C_9H_3-1,3-(CHMe_2)_2-4,7-Me_2)$ , **3b**.

| Identification code                         | IndTempIntermediate_a                                                              |
|---------------------------------------------|------------------------------------------------------------------------------------|
| Empirical formula                           | C <sub>48</sub> H <sub>85</sub> Cl <sub>2</sub> NO <sub>2</sub> P <sub>2</sub> SiU |
| Formula weight                              | 1107.12                                                                            |
| Temperature/K                               | 100.0                                                                              |
| Crystal system                              | monoclinic                                                                         |
| Space group                                 | P2 <sub>1</sub> /n                                                                 |
| a/Å                                         | 13.7880(7)                                                                         |
| b/Å                                         | 18.7203(10)                                                                        |
| c/Å                                         | 20.9908(11)                                                                        |
| α/°                                         | 90                                                                                 |
| β/°                                         | 103.403(3)                                                                         |
| γ/°                                         | 90                                                                                 |
| Volume/Å <sup>3</sup>                       | 5270.5(5)                                                                          |
| Z                                           | 4                                                                                  |
| ρ <sub>calc</sub> /cm <sup>3</sup>          | 1.395                                                                              |
| μ/mm <sup>-1</sup>                          | 3.300                                                                              |
| F(000)                                      | 2264.0                                                                             |
| Crystal size/mm <sup>3</sup>                | 0.35 × 0.15 × 0.12                                                                 |
| Radiation                                   | MoKα (λ = 0.71073)                                                                 |
| 2θ range for data collection/°              | 4.002 to 53.462                                                                    |
| Index ranges                                | -17 ≤ h ≤ 17, -20 ≤ k ≤ 23, -26 ≤ l ≤ 26                                           |
| Reflections collected                       | 59036                                                                              |
| Independent reflections                     | 11192 [R <sub>int</sub> = 0.0984, R <sub>sigma</sub> = 0.0755]                     |
| Data/restraints/parameters                  | 11192/0/537                                                                        |
| Goodness-of-fit on F <sup>2</sup>           | 1.041                                                                              |
| Final R indexes [I ≥ 2σ (I)]                | R <sub>1</sub> = 0.0360, wR <sub>2</sub> = 0.0733                                  |
| Final R indexes [all data]                  | R <sub>1</sub> = 0.0607, wR <sub>2</sub> = 0.0798                                  |
| Largest diff. peak/hole / e Å <sup>-3</sup> | 1.19/-0.73                                                                         |

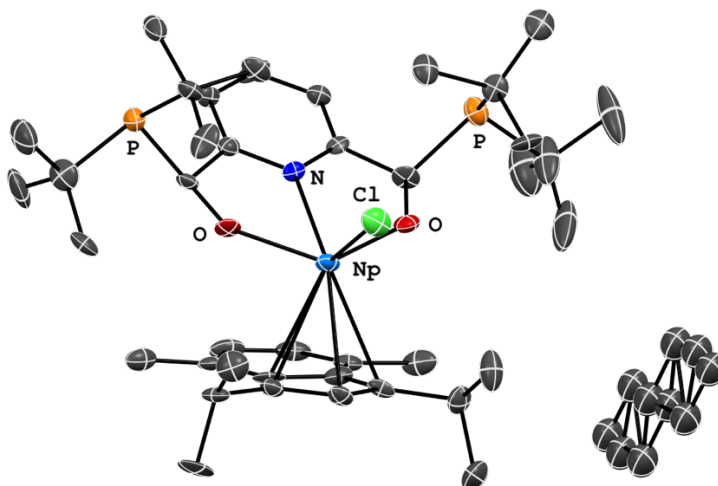

**Figure S29.** Crystal structure of  $(1,3\text{-iPr}_2\text{-4,7-Me}_2\text{-C}_9\text{H}_3)(^t\text{Bu}_2\text{P})\text{ONO})\text{NpCl}$ , **4**.

**Table S30.** Crystal data and structure refinement for  $(1,3\text{-iPr}_2\text{-4,7-Me}_2\text{-C}_9\text{H}_3)(^t\text{Bu}_2\text{P})\text{ONO})\text{NpCl}$ , **4**.

| Identification code                            | <b>mesoONONpInd_5</b>                                       |
|------------------------------------------------|-------------------------------------------------------------|
| Empirical formula                              | $\text{C}_{42.5}\text{H}_{70}\text{ClNnP}_2\text{O}_2$      |
| Formula weight                                 | 961.38                                                      |
| Temperature/K                                  | 100.00                                                      |
| Crystal system                                 | monoclinic                                                  |
| Space group                                    | $P2_1/n$                                                    |
| a/Å                                            | 14.5847(9)                                                  |
| b/Å                                            | 15.9526(9)                                                  |
| c/Å                                            | 20.0810(12)                                                 |
| $\alpha/^\circ$                                | 90                                                          |
| $\beta/^\circ$                                 | 107.634(4)                                                  |
| $\gamma/^\circ$                                | 90                                                          |
| Volume/Å <sup>3</sup>                          | 4452.6(5)                                                   |
| Z                                              | 4                                                           |
| $\rho_{\text{calc}}/\text{cm}^3$               | 1.434                                                       |
| $\mu/\text{mm}^{-1}$                           | 2.499                                                       |
| F(000)                                         | 1952.0                                                      |
| Crystal size/mm <sup>3</sup>                   | 0.15 × 0.15 × 0.1                                           |
| Radiation                                      | MoK $\alpha$ ( $\lambda = 0.71073$ )                        |
| 2 $\theta$ range for data collection/ $^\circ$ | 4.84 to 52.042                                              |
| Index ranges                                   | $-18 \leq h \leq 17, 0 \leq k \leq 19, 0 \leq l \leq 24$    |
| Reflections collected                          | 8432                                                        |
| Independent reflections                        | 8432 [ $R_{\text{int}} = ?$ , $R_{\text{sigma}} = 0.0619$ ] |
| Data/restraints/parameters                     | 8432/87/464                                                 |
| Goodness-of-fit on F <sup>2</sup>              | 1.176                                                       |
| Final R indexes [ $I \geq 2\sigma(I)$ ]        | $R_1 = 0.0604$ , $wR_2 = 0.1144$                            |
| Final R indexes [all data]                     | $R_1 = 0.0919$ , $wR_2 = 0.1325$                            |
| Largest diff. peak/hole / e Å <sup>-3</sup>    | 1.88/-1.70                                                  |



## 6. References

1. J. L. Kiplinger, D. E. Morris, B. L. Scott and C. J. Burns, *Organometallics*, 2002, **21**, 5978-5982.
2. S. D. Reilly, J. L. Brown, B. L. Scott and A. J. Gaunt, *Dalton Trans.*, 2014, **43**, 1498-1501.
3. G. P. McGovern, F. Hung-Low, J. W. Tye and C. A. Bradley, *Organometallics*, 2012, **31**, 3865-3879.
4. S. H. Carpenter, B. S. Billow and A. M. Tondreau, *Organometallics*, 2021, **40**, 2389-2393.
5. J. E. Radcliffe, A. S. Batsanov, D. M. Smith, J. A. Scott, P. W. Dyer and M. J. Hanton, *ACS Catal.*, 2015, **5**, 7095-7098.
6. C. A. P. Goodwin, M. T. Janicke, B. L. Scott and A. J. Gaunt, *J. Am. Chem. Soc.*, 2021, **143**, 20680-20696.
7. Service, B. I. *Version 2010.1.0.0*, Bruker AXS Inc.: Madison, WI, 2010.
8. *SAINTE Plus, Data Reduction Software. Version 7.68A*, Bruker AXS Inc.: Madison, WI, 2009.
9. G. M. Sheldrick, *Acta Crystallogr., Sect. A: Found. Crystallogr.*, 2008, **64**, 112-122.
10. Sheldrick, G. M. *SADABS*, University of Göttingen: Germany, 2005.
11. G. M. Sheldrick, *Acta Crystallogr., Sect. C: Struct. Chem.*, 2015, **71**, 3-8.
12. *APEX2, Data Refinement Software. Version 2010.1-2*, Bruker AXS Inc.: Madison, WI, 2010.
13. Olex2 1.2 (compiled 2014.06.27 svn.r2953 for OlexSys, GUI svn.r4855).
14. O. V. Dolomanov, L. J. Bourhis, R. J. Gildea, J. A. K. Howard and H. Puschmann, *J. Appl. Crystallogr.*, 2009, **42**, 339-341.
15. R. F. Rüger, M.; Trnka, T.; Yakovlev, A.; van Lenthe, E.; Philipsen, P.; van Vuren, T.; Klumpers, B.; Soini, T., *AMS, SCM, Theoretical Chemistry; Vrije Universiteit: Amsterdam, The Netherlands, 2021*.
16. J. P. Perdew, K. Burke and M. Ernzerhof, *Phys. Rev. Lett.*, 1996, **77**, 3865-3868.
17. A. D. Becke, *J. Chem. Phys.*, 1993, **98**, 5648.
18. C. Lee, W. Yang and R. G. Parr, *Phys. Rev. B: Condens. Matter*, 1988, **37**, 785.
19. E. van Lenthe, J. G. Snijders and E. J. Baerends, *J. Chem. Phys.*, 1996, **105**, 6505-6516.
20. E. D. B. Glendening, J. K.; Reed, A. E.; Carpenter, J. E.; Bohmann, J. A.; Morales, C. M.; Karafiloglou, P.; Landis, C. R.; Weinhold, F. , *Journal*, 2018.
21. M. P. Mitoraj, A. Michalak and T. Ziegler, *J. Chem. Theory Comput.*, 2009, **5**, 962-975.
22. F. Neese, *WIREs Computational Molecular Science*, 2022, **12**, e1606.
23. F. Weigend and R. Ahlrichs, *Phys. Chem. Chem. Phys.*, 2005, **7**, 3297-3305.
24. D. A. Pantazis and F. Neese, *J. Chem. Theory Comput.*, 2011, **7**, 677-684.
25. B. A. Hess, *Phys. Rev. A: Gen. Phys.*, 1986, **33**, 3742.
26. B. O. Roos, P. R. Taylor and E. M. Siegbahn, *Chem. Phys.*, 1980, **48**, 157.
27. C. Angeli, R. Cimraglia and J.-P. Malrieu, *J. Chem. Phys.*, 2002, **117**, 9138-9153.
